# Supplementary material for: A Quartet of PIF bHLH Factors Provides a Transcriptionally Centered Signaling Hub That Regulates Seedling Morphogenesis through Differential Expression-Patterning of Shared Target Genes in Arabidopsis
Source: PLoS Genet. 2013 Jan 31;9(1):e1003244. doi: 10.1371/journal.pgen.1003244 (PMC3561105; doi:10.1371/journal.pgen.1003244)
Supplement: Table S3 — List of PIF3-bound genes. (XLS) [file pgen.1003244.s010.xls]

## Sheet: Table_S3
Table S3. List of PIF3-bound genes.
Peak ID	Locus	Distance to TSS (bp)	Strand	Description
1	AT1G01260	-745	+	basic helix-loop-helix (bHLH) DNA-binding superfamily protein
1	AT1G01250	-2958	−	Integrase-type DNA-binding superfamily protein
2	AT1G01650	-2011	−	SIGNAL PEPTIDE PEPTIDASE-LIKE 4 (SPPL4)
3	AT1G01720	-95	+	ATAF1
5	AT1G02230	-263	−	NAC domain containing protein 4 (NAC004)
6	AT1G02340	-1459	−	LONG HYPOCOTYL IN FAR-RED (HFR1)
6	AT1G02350	-516	+	protoporphyrinogen oxidase-related
7	AT1G02400	-1026	+	gibberellin 2-oxidase 6 (GA2OX6)
7	AT1G02391	-1857	−	unknown protein
8	AT1G02660	-627	−	alpha/beta-Hydrolases superfamily protein
8	AT1G02670	-439	+	P-loop containing nucleoside triphosphate hydrolases superfamily protein
10	AT1G04171	-2750	−	unknown protein
10	AT1G04180	-1266	+	YUCCA 9 (YUC9)
12	AT1G04370	-810	+	Ethylene-responsive element binding factor 14 (ERF14)
15	AT1G07090	-181	−	LIGHT SENSITIVE HYPOCOTYLS 6 (LSH6)
15	AT1G07100	-2811	+	tRNA-Ile (anticodon: TAT)
16	AT1G07200	-2476	−	Double Clp-N motif-containing P-loop nucleoside triphosphate hydrolases superfamily protein
16	AT1G07210	-202	+	Ribosomal protein S18
17	AT1G07420	-154	+	sterol 4-alpha-methyl-oxidase 2-1 (SMO2-1)
19	AT1G07670	-401	−	endomembrane-type CA-ATPase 4 (ECA4)
19	AT1G07680	-1067	+	unknown protein
20	AT1G08570	-658	+	atypical CYS HIS rich thioredoxin 4 (ACHT4)
20	AT1G08560	-1323	−	syntaxin of plants 111 (SYP111)
22	AT1G09260	-2880	+	Chaperone DnaJ-domain superfamily protein
23	AT1G09350	-193	+	galactinol synthase 3 (GolS3)
24	AT1G10560	-221	+	plant U-box 18 (PUB18)
24	AT1G10550	-3372	−	xyloglucan:xyloglucosyl transferase 33 (XTH33)
25	AT1G11960	-510	−	ERD (early-responsive to dehydration stress) family protein
25	AT1G11980	-1230	+	ubiquitin-related protein 3 (RUB3)
26	AT1G12070	-2539	−	Immunoglobulin E-set superfamily protein
26	AT1G12080	-1518	+	Vacuolar calcium-binding protein-related
27	AT1G13240	-1383	−	tRNA-Ile (anticodon: AAT)
29	AT1G13740	-492	+	ABI five binding protein 2 (AFP2)
31	AT1G14910	-4338	−	ENTH/ANTH/VHS superfamily protein
31	AT1G14920	-1200	+	GIBBERELLIC ACID INSENSITIVE (GAI)
32	AT1G15750	-873	−	TOPLESS (TPL)
33	AT1G16858	-1547	+	conserved peptide upstream open reading frame 55 (CPuORF55)
33	AT1G16860	-1547	+	Ubiquitin-specific protease family C19-related protein
33	AT1G16850	-103	−	unknown protein
35	AT1G18075	-1135	+	MIR159/MIR159B
35	AT1G18070	-1179	−	Translation elongation factor EF1A/initiation factor IF2gamma family protein
37	AT1G19110	-318	+	inter-alpha-trypsin inhibitor heavy chain-related
38	AT1G19180	-1016	+	jasmonate-zim-domain protein 1 (JAZ1)
39	AT1G19320	-1523	+	Pathogenesis-related thaumatin superfamily protein
39	AT1G19310	-86	−	RING/U-box superfamily protein
40	AT1G19790	-4783	−	SHI-related sequence 7 (SRS7)
40	AT1G19800	-1299	+	trigalactosyldiacylglycerol 1 (TGD1)
42	AT1G20450	-544	−	EARLY RESPONSIVE TO DEHYDRATION 10 (ERD10)
42	AT1G20460	-1212	+	unknown protein
44	AT1G20870	-848	−	HSP20-like chaperones superfamily protein
46	AT1G20900	-2030	+	ESCAROLA (ESC)
46	AT1G20890	-3204	−	unknown protein
48	AT1G21040	-2855	−	Mutator-like transposase family, has a 3.3e-87 P-value blast match to Q9SLM0 /314-478 Pfam PF03108 MuDR family transposase (MuDr-element domain)
48	AT1G21050	-587	+	Protein of unknown function, DUF617
49	AT1G21060	-2526	+	Protein of unknown function, DUF547
50	AT1G21590	-1044	−	Protein kinase protein with adenine nucleotide alpha hydrolases-like domain
51	AT1G21973	-1252	−	Encodes a Plant thionin family protein [pseudogene]
51	AT1G21980	-2344	+	phosphatidylinositol-4-phosphate 5-kinase 1 (PIP5K1)
52	AT1G22060	-1905	−	LOCATED IN: vacuole
52	AT1G22065	-3286	+	unknown protein
53	AT1G22190	-1104	+	Integrase-type DNA-binding superfamily protein
53	AT1G22180	-4287	−	Sec14p-like phosphatidylinositol transfer family protein
54	AT1G22770	-1142	+	GIGANTEA (GI)
55	AT1G23030	-2865	+	ARM repeat superfamily protein
55	AT1G23020	-425	−	ferric reduction oxidase 3 (FRO3)
58	AT1G25440	-2824	−	B-box type zinc finger protein with CCT domain
59	AT1G26916	-1136	+	unknown protein
63	AT1G29290	-1879	+	unknown protein
66	AT1G30270	-1115	+	CBL-interacting protein kinase 23 (CIPK23)
70	AT1G31420	-68	+	FEI 1 (FEI1)
70	AT1G31410	-192	−	putrescine-binding periplasmic protein-related
71	AT1G33070	-4167	+	MADS-box family protein
71	AT1G33060	-202	−	NAC 014 (NAC014)
72	AT1G33450	-528	+	similar to unknown protein [Arabidopsis thaliana] (TAIR:AT4G04780.2)
73	AT1G34630	-148	+	BEST Arabidopsis thaliana protein match is: Mitochondrial import inner membrane translocase subunit Tim17/Tim22/Tim23 family protein (TAIR:AT5G51150.1)
73	AT1G34620	-506	−	Mutator-like transposase family, has a 8.5e-75 P-value blast match to Q9SJR8 /172-333 Pfam PF03108 MuDR family transposase (MuDr-element domain)
74	AT1G35900	-2377	−	unknown protein
75	AT1G45130	-2722	+	beta-galactosidase 5 (BGAL5)
78	AT1G49610	-1505	−	F-box family protein
80	AT1G51790	-883	−	Leucine-rich repeat protein kinase family protein
80	AT1G51800	-1849	+	Leucine-rich repeat protein kinase family protein
81	AT1G52347	-335	+	other RNA
81	AT1G52343	-454	−	unknown protein
82	AT1G52700	-1726	−	alpha/beta-Hydrolases superfamily protein
83	AT1G53170	-3345	−	ethylene response factor 8 (ERF8)
85	AT1G54210	-1491	+	AUTOPHAGY 12 A (ATG12A)
87	AT1G56010	-698	−	NAC domain containing protein 1 (NAC1)
87	AT1G56020	-2166	+	unknown protein
89	AT1G60010	-3423	−	unknown protein
90	AT1G60150	-1603	−	pseudogene, similar to putative AP endonuclease/reverse transcriptase, blastp match of 28% identity and 3.6e-07 P-value to GP|21952510|gb|AAM82604.1|AF525305_2|AF525305 putative AP endonuclease/reverse transcriptase {Brassica napus}
91	AT1G60190	-223	+	ARM repeat superfamily protein
91	AT1G60180	-1496	−	similar to unknown protein [Arabidopsis thaliana] (TAIR:AT3G18150.1)
92	AT1G62480	-2067	+	Vacuolar calcium-binding protein-related
93	AT1G63090	-2645	−	phloem protein 2-A11 (PP2-A11)
95	AT1G64980	-130	−	Nucleotide-diphospho-sugar transferases superfamily protein
97	AT1G67050	-180	−	unknown protein
99	AT1G67265	-2085	−	ROTUNDIFOLIA like 21 (RTFL21)
100	AT1G67590	-512	−	Remorin family protein
101	AT1G68020	-554	+	ATTPS6
102	AT1G68552	-3102	−	conserved peptide upstream open reading frame 53 (CPuORF53)
102	AT1G68550	-3102	−	Integrase-type DNA-binding superfamily protein
104	AT1G68560	-3105	−	alpha-xylosidase 1 (XYL1)
105	AT1G68670	-711	+	myb-like transcription factor family protein
105	AT1G68660	-2158	−	Ribosomal protein L12/ ATP-dependent Clp protease adaptor protein ClpS family protein
106	AT1G69010	-133	+	BES1-interacting Myc-like protein 2 (BIM2)
107	AT1G69270	-479	−	receptor-like protein kinase 1 (RPK1)
108	AT1G69295	-575	−	plasmodesmata callose-binding protein 4 (PDCB4)
109	AT1G69570	-953	−	Dof-type zinc finger DNA-binding family protein
111	AT1G69690	-2515	+	TCP family transcription factor
113	AT1G70430	-4211	+	Protein kinase superfamily protein
113	AT1G70420	-617	−	Protein of unknown function (DUF1645)
114	AT1G70940	-582	+	PIN-FORMED 3 (PIN3)
115	AT1G72470	-744	+	exocyst subunit exo70 family protein D1 (EXO70D1)
116	AT1G72490	-1710	−	unknown protein
117	AT1G73120	-177	−	unknown protein
117	AT1G73130	-909	+	unknown protein
118	AT1G73660	-1893	−	protein tyrosine kinase family protein
119	AT1G73670	-218	+	MAP kinase 15 (MPK15)
121	AT1G74450	-285	+	FUNCTIONS IN: molecular_function unknown
121	AT1G74440	-1821	−	Protein of unknown function (DUF962)
122	AT1G74840	-19	−	Homeodomain-like superfamily protein
123	AT1G75240	-1345	+	homeobox protein 33 (HB33)
124	AT1G75390	-1371	+	basic leucine-zipper 44 (bZIP44)
124	AT1G75388	-1371	+	conserved peptide upstream open reading frame 5 (CPuORF5)
125	AT1G75450	-649	−	cytokinin oxidase 5 (CKX5)
126	AT1G75540	-2382	+	salt tolerance homolog2 (STH2)
130	AT1G76500	-3895	+	SUPPRESSOR OF PHYB-4#3 (SOB3)
132	AT1G77740	-2656	−	phosphatidylinositol-4-phosphate 5-kinase 2 (PIP5K2)
133	AT1G78080	-3152	+	related to AP2 4 (RAP2.4)
134	AT1G78700	-334	+	BES1/BZR1 homolog 4 (BEH4)
135	AT1G79370	-571	+	cytochrome P450, family 79, subfamily C, polypeptide 1 (CYP79C1)
135	AT1G79360	-1543	−	organic cation/carnitine transporter 2 (2-Oct)
136	AT1G79580	-1853	−	SOMBRERO (SMB)
136	AT1G79590	-1002	+	syntaxin of plants 52 (SYP52)
139	AT2G01140	-3920	−	Aldolase superfamily protein
139	AT2G01150	-75	+	RING-H2 finger protein 2B (RHA2B)
140	AT2G01420	-167	−	PIN-FORMED 4 (PIN4)
142	AT2G01570	-1577	−	REPRESSOR OF GA1-3 1 (RGA1)
144	AT2G03120	-98	+	signal peptide peptidase (SPP)
145	AT2G03730	-1950	−	ACT domain repeat 5 (ACR5)
147	AT2G10611	-3602	+	gypsy-like retrotransposon family, has a 4.3e-12 P-value blast match to GB:BAA84458 GAG-POL precursor (gypsy_Ty3-element) (Oryza sativa)gi|5902445|dbj|BAA84458.1| GAG-POL precursor (Oryza sativa (japonica cultivar-group)) (RIRE2) (Gypsy_Ty3-family)
148	AT2G14890	-143	+	arabinogalactan protein 9 (AGP9)
148	AT2G14880	-4541	−	SWIB/MDM2 domain superfamily protein
149	AT2G14960	-977	−	GH3.1
152	AT2G17290	-615	+	calcium dependent protein kinase 6 (CPK6)
153	AT2G18090	-37	+	PHD finger family protein / SWIB complex BAF60b domain-containing protein / GYF domain-containing protein
155	AT2G18300	-694	−	basic helix-loop-helix (bHLH) DNA-binding superfamily protein
157	AT2G18700	-1191	+	trehalose phosphatase/synthase 11 (TPS11)
161	AT2G23170	-185	−	GH3.3
165	AT2G27060	-2245	+	Leucine-rich repeat protein kinase family protein
166	AT2G27505	-1824	+	FBD-like domain family protein
166	AT2G27500	-895	−	Glycosyl hydrolase superfamily protein
167	AT2G28056	-3892	−	MIR172/MIR172A
169	AT2G28400	-3374	−	Protein of unknown function, DUF584
171	AT2G30150	-74	+	UDP-Glycosyltransferase superfamily protein
173	AT2G30770	-3758	−	cytochrome P450, family 71, subfamily A, polypeptide 13 (CYP71A13)
173	AT2G30780	-706	+	Tetratricopeptide repeat (TPR)-like superfamily protein
174	AT2G30980	-538	−	SHAGGY-related protein kinase dZeta (SKdZeta)
175	AT2G31980	-110	−	PHYTOCYSTATIN 2 (CYS2)
176	AT2G34020	-1081	−	Calcium-binding EF-hand family protein
177	AT2G34180	-588	−	CBL-interacting protein kinase 13 (CIPK13)
177	AT2G34185	-1483	+	unknown protein
178	AT2G35880	-412	−	TPX2 (targeting protein for Xklp2) protein family
181	AT2G40008	-2012	+	other RNA
183	AT2G40270	-741	−	Protein kinase family protein
184	AT2G40300	-117	−	ferritin 4 (FER4)
184	AT2G40310	-669	+	Pectin lyase-like superfamily protein
185	AT2G40540	-44	+	potassium transporter 2 (KT2)
186	AT2G40610	-552	−	expansin A8 (EXPA8)
187	AT2G40970	-709	−	MYBC1
187	AT2G40980	-2687	+	Protein kinase superfamily protein
188	AT2G41310	-1320	+	response regulator 3 (RR3)
188	AT2G41300	-4322	−	strictosidine synthase-like 1 (SSL1)
189	AT2G41850	-1157	−	polygalacturonase abscission zone A. thaliana (PGAZAT)
190	AT2G42280	-2321	−	basic helix-loop-helix (bHLH) DNA-binding superfamily protein
192	AT2G42620	-57	+	MORE AXILLARY BRANCHES 2 (MAX2)
193	AT2G42870	-3022	−	PHY RAPIDLY REGULATED 1 (PAR1)
194	AT2G43060	-1925	+	ILI1 binding bHLH 1 (IBH1)
196	AT2G43340	-177	+	Protein of unknown function (DUF1685)
197	AT2G44910	-2052	−	homeobox-leucine zipper protein 4 (HB4)
197	AT2G44920	-2811	+	Tetratricopeptide repeat (TPR)-like superfamily protein
200	AT2G45730	-234	−	eukaryotic initiation factor 3 gamma subunit family protein
200	AT2G45740	-323	+	peroxin 11D (PEX11D)
201	AT2G46225	-533	+	ABI-1-like 1 (ABIL1)
202	AT2G46330	-700	−	arabinogalactan protein 16 (AGP16)
203	AT2G46530	-4042	+	auxin response factor 11 (ARF11)
204	AT2G46970	-1255	−	phytochrome interacting factor 3-like 1 (PIL1)
205	AT2G47170	-3689	+	ARF1A1C
205	AT2G47160	-1788	−	REQUIRES HIGH BORON 1 (BOR1)
206	AT2G47500	-1741	+	P-loop nucleoside triphosphate hydrolases superfamily protein with CH (Calponin Homology) domain
207	AT3G02150	-4078	+	plastid transcription factor 1 (PTF1)
207	AT3G02140	-442	−	TWO OR MORE ABRES-CONTAINING GENE 2 (TMAC2)
209	AT3G02570	-176	−	MATERNAL EFFECT EMBRYO ARREST 31 (MEE31)
209	AT3G02580	-1133	+	sterol 1 (STE1)
210	AT3G02990	-228	+	heat shock transcription factor A1E (HSFA1E)
210	AT3G02980	-1030	−	MEIOTIC CONTROL OF CROSSOVERS1 (MCC1)
215	AT3G04920	-2289	+	Ribosomal protein S24e family protein
216	AT3G05905	-1217	+	other RNA
216	AT3G05890	-1197	−	RARE-COLD-INDUCIBLE 2B (RCI2B)
217	AT3G06580	-1546	−	GALK
218	AT3G06760	-1672	+	Drought-responsive family protein
218	AT3G06750	-772	−	hydroxyproline-rich glycoprotein family protein
221	AT3G11590	-2297	+	unknown protein
223	AT3G12120	-689	−	fatty acid desaturase 2 (FAD2)
224	AT3G12600	-112	+	nudix hydrolase homolog 16 (NUDT16)
224	AT3G12590	-744	−	unknown protein
227	AT3G12930	-3978	+	Lojap-related protein
227	AT3G12920	-922	−	SBP (S-ribonuclease binding protein) family protein
228	AT3G13810	-2813	+	indeterminate(ID)-domain 11 (IDD11)
229	AT3G14205	-2958	−	Phosphoinositide phosphatase family protein
230	AT3G14370	-1238	−	WAG2
231	AT3G14440	-88	−	nine-cis-epoxycarotenoid dioxygenase 3 (NCED3)
235	AT3G15540	-184	+	indole-3-acetic acid inducible 19 (IAA19)
236	AT3G17100	-64	+	sequence-specific DNA binding transcription factors
237	AT3G17510	-2706	−	CBL-interacting protein kinase 1 (CIPK1)
238	AT3G18250	-749	−	Putative membrane lipoprotein
239	AT3G18485	-3141	−	IAA-LEUCINE RESISTANT 2 (ILR2)
240	AT3G18710	-337	−	plant U-box 29 (PUB29)
241	AT3G18780	-1126	+	actin 2 (ACT2)
242	AT3G19590	-302	+	BUB (BUDDING UNINHIBITED BY BENZYMIDAZOL) 3.1 (BUB3.1)
242	AT3G19580	-1097	−	zinc-finger protein 2 (ZF2)
244	AT3G20250	-369	−	pumilio 5 (PUM5)
245	AT3G20640	-806	−	basic helix-loop-helix (bHLH) DNA-binding superfamily protein
246	AT3G21330	-3838	+	basic helix-loop-helix (bHLH) DNA-binding superfamily protein
246	AT3G21320	-1562	−	BEST Arabidopsis thaliana protein match is: hydroxyproline-rich glycoprotein family protein (TAIR:AT2G25930.1)
249	AT3G23030	-1057	−	indole-3-acetic acid inducible 2 (IAA2)
249	AT3G23040	-3224	+	unknown protein
250	AT3G23637	-741	−	DEVIL 21 (DVL21)
250	AT3G23640	-1185	+	heteroglycan glucosidase 1 (HGL1)
251	AT3G24503	-95	−	aldehyde dehydrogenase 2C4 (ALDH2C4)
252	AT3G24840	-532	+	Sec14p-like phosphatidylinositol transfer family protein
255	AT3G25727	-1500	−	BEST Arabidopsis thaliana protein match is: RNA-directed DNA polymerase (reverse transcriptase)-related family protein (TAIR:AT2G02520.1)
255	AT3G25730	-587	+	ethylene response DNA binding factor 3 (EDF3)
257	AT3G26210	-712	−	cytochrome P450, family 71, subfamily B, polypeptide 23 (CYP71B23)
258	AT3G26511	-935	−	unknown protein
260	AT3G26530	-2020	−	similar to Ulp1 protease family protein [Arabidopsis thaliana] (TAIR:AT1G08740.1)
261	AT3G27210	-130	−	unknown protein
262	AT3G27960	-1111	−	Tetratricopeptide repeat (TPR)-like superfamily protein
263	AT3G29370	-1575	+	unknown protein
264	AT3G29575	-157	−	ABI five binding protein 3 (AFP3)
269	AT3G45600	-24	−	tetraspanin3 (TET3)
270	AT3G46620	-140	−	zinc finger (C3HC4-type RING finger) family protein
271	AT3G47430	-2067	+	peroxin 11B (PEX11B)
271	AT3G47420	-3279	−	phosphate starvation-induced gene 3 (PS3)
273	AT3G47620	-742	+	TEOSINTE BRANCHED, cycloidea and PCF (TCP) 14 (TCP14)
275	AT3G50800	-408	−	unknown protein
276	AT3G51670	-2377	+	SEC14 cytosolic factor family protein / phosphoglyceride transfer family protein
276	AT3G51660	-1227	−	Tautomerase/MIF superfamily protein
278	AT3G53668	-114	+	conserved peptide upstream open reading frame 51 (CPuORF51)
278	AT3G53670	-114	+	unknown protein
279	AT3G54030	-2364	+	Protein kinase protein with tetratricopeptide repeat domain
280	AT3G54200	-551	+	Late embryogenesis abundant (LEA) hydroxyproline-rich glycoprotein family
280	AT3G54190	-961	−	Transducin/WD40 repeat-like superfamily protein
281	AT3G54500	-1301	−	BEST Arabidopsis thaliana protein match is: dentin sialophosphoprotein-related (TAIR:AT5G64170.1)
281	AT3G54510	-10	+	Early-responsive to dehydration stress protein (ERD4)
282	AT3G54804	-240	−	unknown protein
283	AT3G54810	-31	+	BLUE MICROPYLAR END 3 (BME3)
284	AT3G54960	-154	−	PDI-like 1-3 (PDIL1-3)
287	AT3G57800	-2121	−	basic helix-loop-helix (bHLH) DNA-binding superfamily protein
287	AT3G57810	-2052	+	Cysteine proteinases superfamily protein
288	AT3G57870	-342	−	sumo conjugation enzyme 1 (SCE1)
289	AT3G58640	-78	−	Mitogen activated protein kinase kinase kinase-related
291	AT3G60190	-872	−	DYNAMIN-like 1E (DL1E)
291	AT3G60200	-553	+	unknown protein
292	AT3G60220	-1195	−	TOXICOS EN LEVADURA 4 (ATL4)
293	AT3G60390	-3641	−	homeobox-leucine zipper protein 3 (HAT3)
294	AT3G60400	-1070	+	Mitochondrial transcription termination factor family protein
295	AT3G60690	-2802	+	SAUR-like auxin-responsive protein family
296	AT3G61830	-1201	+	auxin response factor 18 (ARF18)
297	AT3G61960	-780	−	Protein kinase superfamily protein
298	AT3G62100	-4439	+	indole-3-acetic acid inducible 30 (IAA30)
300	AT3G62630	-954	−	Protein of unknown function (DUF1645)
301	AT3G62640	-893	−	Protein of unknown function (DUF3511)
301	AT3G62650	-269	+	unknown protein
304	AT4G00810	-272	−	60S acidic ribosomal protein family
304	AT4G00820	-1661	+	IQ-domain 17 (iqd17)
305	AT4G01245	-949	+	FUNCTIONS IN: molecular_function unknown
305	AT4G01250	-2427	−	WRKY22
306	AT4G03010	-570	+	RNI-like superfamily protein
307	AT4G03390	-460	−	STRUBBELIG-receptor family 3 (SRF3)
308	AT4G05010	-271	+	F-box family protein
310	AT4G05190	-1731	+	kinesin 5 (ATK5)
310	AT4G05180	-128	−	photosystem II subunit Q-2 (PSBQ-2)
316	AT4G11050	-1738	−	glycosyl hydrolase 9C3 (GH9C3)
317	AT4G12432	-977	−	conserved peptide upstream open reading frame 26 (CPuORF26)
317	AT4G12430	-977	−	Haloacid dehalogenase-like hydrolase (HAD) superfamily protein
318	AT4G14135	-2654	+	Pseudogene of AT3G29785
318	AT4G14130	-1878	−	xyloglucan endotransglucosylase/hydrolase 15 (XTH15)
321	AT4G15233	-528	+	ABC-2 and Plant PDR ABC-type transporter family protein
322	AT4G15300	-3149	−	cytochrome P450, family 702, subfamily A, polypeptide 2 (CYP702A2)
322	AT4G15310	-825	+	cytochrome P450, family 702, subfamily A, polypeptide 3 (CYP702A3)
323	AT4G16770	-3627	−	2-oxoglutarate (2OG) and Fe(II)-dependent oxygenase superfamily protein
327	AT4G16780	-3055	+	homeobox protein 2 (HB-2)
328	AT4G17420	-39	−	Tryptophan RNA-binding attenuator protein-like
329	AT4G17450	-883	−	copia-like retrotransposon family, has a 1.4e-306 P-value blast match to GB:CAA72989 open reading frame 1 (Ty1_Copia-element) (Brassica oleracea)
329	AT4G17460	-1465	+	HAT1
331	AT4G17810	-2366	+	C2H2 and C2HC zinc fingers superfamily protein
333	AT4G19395	-377	+	MIR168/MIR168A
333	AT4G19390	-1848	−	Uncharacterised protein family (UPF0114)
336	AT4G22010	-850	+	SKU5 similar 4 (sks4)
336	AT4G22000	-1569	−	unknown protein
337	AT4G22190	-2169	−	unknown protein
339	AT4G23060	-385	+	IQ-domain 22 (IQD22)
342	AT4G24240	-54	+	WRKY DNA-binding protein 7 (WRKY7)
343	AT4G25390	-315	+	Protein kinase superfamily protein
343	AT4G25380	-699	−	stress-associated protein 10 (SAP10)
345	AT4G26700	-2540	+	fimbrin 1 (FIM1)
345	AT4G26690	-945	−	SHAVEN 3 (SHV3)
347	AT4G27310	-606	+	B-box type zinc finger family protein
347	AT4G27300	-2685	−	S-locus lectin protein kinase family protein
348	AT4G27950	-606	−	cytokinin response factor 4 (CRF4)
349	AT4G28650	-2137	−	Leucine-rich repeat transmembrane protein kinase family protein
349	AT4G28660	-243	+	photosystem II reaction center PSB28 protein (PSB28)
350	AT4G28720	-487	+	YUCCA 8 (YUC8)
351	AT4G29090	-2040	+	Ribonuclease H-like superfamily protein
352	AT4G29130	-3822	−	hexokinase 1 (HXK1)
353	AT4G29230	-1345	+	NAC domain containing protein 75 (NAC075)
353	AT4G29220	-2402	−	phosphofructokinase 1 (PFK1)
354	AT4G30420	-4817	+	nodulin MtN21 /EamA-like transporter family protein
354	AT4G30410	-77	−	sequence-specific DNA binding transcription factors
356	AT4G31390	-1631	+	Protein kinase superfamily protein
358	AT4G32020	-1934	+	unknown protein
359	AT4G32280	-2209	+	indole-3-acetic acid inducible 29 (IAA29)
359	AT4G32272	-1299	−	Nucleotide/sugar transporter family protein
360	AT4G32480	-1105	+	Protein of unknown function (DUF506)
361	AT4G34000	-891	+	abscisic acid responsive elements-binding factor 3 (ABF3)
361	AT4G33990	-2056	−	embryo defective 2758 (EMB2758)
363	AT4G35090	-936	−	catalase 2 (CAT2)
363	AT4G35100	-4338	+	plasma membrane intrinsic protein 3 (PIP3)
364	AT4G35470	-880	+	plant intracellular ras group-related LRR 4 (PIRL4)
365	AT4G35720	-156	+	Arabidopsis protein of unknown function (DUF241)
366	AT4G35850	-205	+	Pentatricopeptide repeat (PPR) superfamily protein
368	AT4G36530	-1509	−	alpha/beta-Hydrolases superfamily protein
368	AT4G36540	-138	+	BR enhanced expression 2 (BEE2)
369	AT4G36770	-557	−	UDP-Glycosyltransferase superfamily protein
370	AT4G36860	-1738	−	LIM domain-containing protein
372	AT4G37390	-74	+	BRU6
373	AT4G37470	-718	−	alpha/beta-Hydrolases superfamily protein
373	AT4G37480	-71	+	Chaperone DnaJ-domain superfamily protein
375	AT4G38470	-1603	+	ACT-like protein tyrosine kinase family protein
377	AT4G39400	-3091	+	BRASSINOSTEROID INSENSITIVE 1 (BRI1)
378	AT4G39404	-1934	−	other RNA
381	AT5G02540	-2407	+	NAD(P)-binding Rossmann-fold superfamily protein
381	AT5G02530	-255	−	RNA-binding (RRM/RBD/RNP motifs) family protein
382	AT5G02570	-2198	−	Histone superfamily protein
382	AT5G02580	-515	+	Plant protein 1589 of unknown function
383	AT5G02590	-1807	+	Tetratricopeptide repeat (TPR)-like superfamily protein
384	AT5G03210	-3719	−	unknown protein
388	AT5G04110	-3525	−	DNA GYRASE B3 (GYRB3)
388	AT5G04120	-1612	+	Phosphoglycerate mutase family protein
389	AT5G05970	-2587	+	NEURAL PRECURSOR CELL EXPRESSED, DEVELOPMENTALLY DOWN-REGULATED GENE 1 (NEDD1)
389	AT5G05965	-74	−	unknown protein
390	AT5G06530	-3897	−	ABC-2 type transporter family protein
392	AT5G07010	-2201	−	sulfotransferase 2A (ST2A)
393	AT5G07920	-166	−	diacylglycerol kinase1 (DGK1)
393	AT5G07930	-1370	+	MEI2 C-terminal RRM only like 2 (MCT2)
394	AT5G08130	-2846	−	basic helix-loop-helix (bHLH) DNA-binding superfamily protein
395	AT5G08139	-1661	+	RING/U-box superfamily protein
396	AT5G08330	-47	+	TCP family transcription factor
397	AT5G09350	-111	−	phosphatidylinositol 4-OH kinase beta2 (PI-4KBETA2)
399	AT5G09810	-2489	+	actin 7 (ACT7)
401	AT5G10740	-105	−	Protein phosphatase 2C family protein
401	AT5G10745	-171	+	unknown protein
403	AT5G11940	-2257	+	Subtilase family protein
403	AT5G11930	-1382	−	Thioredoxin superfamily protein
404	AT5G13090	-1601	−	unknown protein
404	AT5G13100	-388	+	unknown protein
405	AT5G13730	-425	−	sigma factor 4 (SIG4)
405	AT5G13740	-1045	+	zinc induced facilitator 1 (ZIF1)
406	AT5G14690	-856	−	unknown protein
407	AT5G15580	-4846	−	LONGIFOLIA1 (LNG1)
407	AT5G15600	-863	+	SPIRAL1-like4 (SP1L4)
408	AT5G16210	-91	−	HEAT repeat-containing protein
409	AT5G16840	-473	+	binding partner of acd11 1 (BPA1)
409	AT5G16830	-145	−	syntaxin of plants 21 (SYP21)
410	AT5G18650	-1102	+	CHY-type/CTCHY-type/RING-type Zinc finger protein
412	AT5G19100	-355	−	Eukaryotic aspartyl protease family protein
417	AT5G23280	-65	+	TCP family transcription factor
420	AT5G24600	-2064	−	Protein of unknown function, DUF599
420	AT5G24610	-2535	+	unknown protein
422	AT5G25460	-93	+	Protein of unknown function, DUF642
422	AT5G25451	-4320	−	Pseudogene of AT5G25440
423	AT5G26146	-2576	+	other RNA
424	AT5G27925	-4670	+	copia-like retrotransposon family, has a 9.0e-249 P-value blast match to GB:AAC02666 polyprotein (Ty1_Copia-element) (Arabidopsis thaliana)
424	AT5G27920	-239	−	F-box family protein
425	AT5G28300	-1817	−	Duplicated homeodomain-like superfamily protein
426	AT5G39570	-121	+	FUNCTIONS IN: molecular_function unknown
426	AT5G39560	-670	−	Galactose oxidase/kelch repeat superfamily protein
429	AT5G41130	-1719	−	Esterase/lipase/thioesterase family protein
429	AT5G41140	-3457	+	Myosin heavy chain-related protein
430	AT5G41905	-725	−	MIR166/MIR166E
430	AT5G41908	-901	+	unknown protein
431	AT5G43060	-677	−	Granulin repeat cysteine protease family protein
435	AT5G45580	-1463	−	Homeodomain-like superfamily protein
439	AT5G47370	-3052	−	HAT2
440	AT5G47820	-1386	+	FRAGILE FIBER 1 (FRA1)
440	AT5G47818	-419	−	unknown pseudogene
441	AT5G48250	-28	−	B-box type zinc finger protein with CCT domain
442	AT5G48543	-4095	+	low-molecular-weight cysteine-rich 1 (LCR1)
442	AT5G48540	-378	−	receptor-like protein kinase-related family protein
443	AT5G48900	-2421	+	Pectin lyase-like superfamily protein
444	AT5G51210	-234	+	oleosin3 (OLEO3)
445	AT5G51460	-1836	+	ATTPPA
447	AT5G53220	-97	+	unknown protein
449	AT5G53540	-984	−	P-loop containing nucleoside triphosphate hydrolases superfamily protein
449	AT5G53550	-3818	+	YELLOW STRIPE like 3 (YSL3)
450	AT5G53588	-1945	+	conserved peptide upstream open reading frame 50 (CPuORF50)
450	AT5G53580	-2867	−	NAD(P)-linked oxidoreductase superfamily protein
450	AT5G53590	-1945	+	SAUR-like auxin-responsive protein family
451	AT5G53760	-3004	+	MILDEW RESISTANCE LOCUS O 11 (MLO11)
452	AT5G53980	-837	+	homeobox protein 52 (HB52)
453	AT5G54470	-540	−	B-box type zinc finger family protein
453	AT5G54480	-1993	+	Protein of unknown function (DUF630 and DUF632)
454	AT5G54510	-2909	−	DWARF IN LIGHT 1 (DFL1)
455	AT5G54530	-1585	+	Protein of unknown function, DUF538
455	AT5G54520	-2021	−	Transducin/WD40 repeat-like superfamily protein
456	AT5G54590	-2763	+	Protein kinase superfamily protein
458	AT5G56980	-1770	−	unknown protein
460	AT5G57780	-96	−	EXPRESSED IN: 18 plant structures
462	AT5G58600	-96	−	POWDERY MILDEW RESISTANT 5 (PMR5)
463	AT5G58660	-1016	+	2-oxoglutarate (2OG) and Fe(II)-dependent oxygenase superfamily protein
463	AT5G58650	-226	−	plant peptide containing sulfated tyrosine 1 (PSY1)
464	AT5G59220	-2141	−	highly ABA-induced PP2C gene 1 (HAI1)
464	AT5G59230	-2796	+	transcription factor-related
465	AT5G59790	-1897	+	CONTAINS InterPro DOMAIN/s: Protein of unknown function DUF966 (InterPro:IPR010369), Uncharacterised conserved protein UCP031043 (InterPro:IPR021182)
466	AT5G60680	-1635	+	Protein of unknown function, DUF584
466	AT5G60670	-2918	−	Ribosomal protein L11 family protein
467	AT5G60840	-2463	−	unknown protein
468	AT5G61960	-2429	−	MEI2-like protein 1 (ML1)
468	AT5G61970	-1469	+	signal recognition particle-related / SRP-related
469	AT5G62000	-1996	+	auxin response factor 2 (ARF2)
471	AT5G62660	-1271	−	F-box and associated interaction domains-containing protein
471	AT5G62670	-495	+	H(+)-ATPase 11 (HA11)
475	AT5G63800	-1881	+	MUCILAGE-MODIFIED 2 (MUM2)
475	AT5G63790	-162	−	NAC domain containing protein 102 (NAC102)
476	AT5G64250	-2034	−	Aldolase-type TIM barrel family protein
476	AT5G64260	-2684	+	EXORDIUM like 2 (EXL2)
477	AT5G64310	-323	+	arabinogalactan protein 1 (AGP1)
478	AT5G65300	-97	−	unknown protein
479	AT5G65305	-3027	−	tRNA-Met (anticodon: CAT)
480	AT5G65640	-3106	+	beta HLH protein 93 (bHLH093)
482	AT5G66320	-1292	−	GATA transcription factor 5 (GATA5)
483	AT5G66580	-331	+	unknown protein
484	AT5G67411	-2238	−	GRAS family transcription factor
485	AT1G01100	-310	−	60S acidic ribosomal protein family
485	AT1G01110	-822	+	IQ-domain 18 (IQD18)
487	AT1G01830	-1883	−	ARM repeat superfamily protein
487	AT1G01840	-809	+	unknown protein
489	AT1G02990	-119	−	BEST Arabidopsis thaliana protein match is: CW-type Zinc Finger (TAIR:AT3G62900.1)
490	AT1G03180	-1961	+	unknown protein
492	AT1G03470	-494	−	Kinase interacting (KIP1-like) family protein
494	AT1G04360	-1881	−	RING/U-box superfamily protein
498	AT1G06850	-107	+	basic leucine-zipper 52 (bZIP52)
498	AT1G06840	-1463	−	Leucine-rich repeat protein kinase family protein
500	AT1G07135	-480	−	glycine-rich protein
503	AT1G10682	-2566	−	other RNA
504	AT1G11210	-232	−	Protein of unknown function (DUF761)
505	AT1G12110	-1905	+	nitrate transporter 1.1 (NRT1.1)
507	AT1G13245	-183	−	ROTUNDIFOLIA like 17 (RTFL17)
510	AT1G13260	-330	+	related to ABI3/VP1 1 (RAV1)
514	AT1G15550	-3582	−	gibberellin 3-oxidase 1 (GA3OX1)
519	AT1G18400	-172	+	BR enhanced expression 1 (BEE1)
524	AT1G19220	-627	−	auxin response factor 19 (ARF19)
525	AT1G19300	-1019	−	PARVUS (PARVUS)
529	AT1G23100	-3751	+	GroES-like family protein
529	AT1G23090	-2962	−	sulfate transporter 91 (AST91)
532	AT1G24590	-4134	−	DORNROSCHEN-like (DRNL)
532	AT1G24600	-867	+	unknown protein
533	AT1G24640	-2054	+	non-LTR retrotransposon family (LINE), has a 4.3e-37 P-value blast match to GB:NP_038602 L1 repeat, Tf subfamily, member 18 (LINE-element) (Mus musculus)
533	AT1G24625	-15	−	zinc finger protein 7 (ZFP7)
536	AT1G28480	-124	−	GRX480
536	AT1G28490	-1723	+	syntaxin of plants 61 (SYP61)
546	AT1G31950	-2536	+	Terpenoid cyclases/Protein prenyltransferases superfamily protein
546	AT1G31940	-1932	−	unknown protein
547	AT1G32060	-444	+	phosphoribulokinase (PRK)
549	AT1G33240	-383	−	GT-2-like 1 (GTL1)
554	AT1G50460	-2856	+	hexokinase-like 1 (HKL1)
554	AT1G50450	-458	−	Saccharopine dehydrogenase
555	AT1G50630	-498	−	Protein of unknown function (DUF3537)
556	AT1G53180	-73	+	unknown protein
558	AT1G53750	-91	−	regulatory particle triple-A 1A (RPT1A)
559	AT1G55020	-2348	+	lipoxygenase 1 (LOX1)
562	AT1G56600	-468	+	galactinol synthase 2 (GolS2)
562	AT1G56590	-2328	−	ZIG SUPPRESSOR 4 (ZIP4)
563	AT1G60050	-3964	−	Nodulin MtN21 /EamA-like transporter family protein
564	AT1G62430	-1683	−	CDP-diacylglycerol synthase 1 (CDS1)
564	AT1G62440	-660	+	leucine-rich repeat/extensin 2 (LRX2)
565	AT1G64090	-1970	+	Reticulan like protein B3 (RTNLB3)
565	AT1G64080	-540	−	unknown protein
566	AT1G66145	-2534	−	CLAVATA3/ESR-RELATED 18 (CLE18)
566	AT1G66150	-41	+	transmembrane kinase 1 (TMK1)
568	AT1G66560	-2221	+	WRKY DNA-binding protein 64 (WRKY64)
571	AT1G68120	-3561	−	basic pentacysteine 3 (BPC3)
571	AT1G68130	-1150	+	indeterminate(ID)-domain 14 (IDD14)
572	AT1G68190	-176	+	B-box zinc finger family protein
573	AT1G68490	-2103	+	unknown protein
575	AT1G68620	-595	+	alpha/beta-Hydrolases superfamily protein
577	AT1G68840	-1247	+	related to ABI3/VP1 2 (RAV2)
577	AT1G68830	-3531	−	STT7 homolog STN7 (STN7)
578	AT1G69030	-2847	−	BSD domain-containing protein
579	AT1G69260	-546	+	ABI five binding protein (AFP1)
581	AT1G69760	-161	−	unknown protein
582	AT1G70760	-3182	+	CHLORORESPIRATORY REDUCTION 23 (CRR23)
582	AT1G70750	-845	−	Protein of unknown function, DUF593
586	AT1G71520	-404	+	Integrase-type DNA-binding superfamily protein
587	AT1G72990	-214	−	beta-galactosidase 17 (BGAL17)
587	AT1G73000	-393	+	PYR1-like 3 (PYL3)
591	AT1G74088	-1549	+	FUNCTIONS IN: molecular_function unknown
592	AT1G74740	-1691	−	calcium-dependent protein kinase 30 (CPK30)
592	AT1G74750	-2466	+	Pentatricopeptide repeat (PPR) superfamily protein
593	AT1G74780	-197	+	Nodulin-like / Major Facilitator Superfamily protein
593	AT1G74770	-785	−	zinc ion binding
594	AT1G75170	-73	+	Sec14p-like phosphatidylinositol transfer family protein
596	AT1G75600	-4814	+	Histone superfamily protein
596	AT1G75590	-2084	−	SAUR-like auxin-responsive protein family
598	AT1G76600	-1007	+	unknown protein
601	AT1G77000	-540	+	SKP2B
602	AT1G77200	-1226	−	Integrase-type DNA-binding superfamily protein
604	AT1G78220	-2342	−	general regulatory factor 13 (GRF13)
604	AT1G78230	-703	+	Outer arm dynein light chain 1 protein
605	AT1G78850	-904	−	D-mannose binding lectin protein with Apple-like carbohydrate-binding domain
606	AT1G80460	-62	−	nonhost resistance to P. s. phaseolicola 1 (NHO1)
612	AT2G03710	-4964	+	SEPALLATA 4 (SEP4)
612	AT2G03700	-844	−	tRNA-Thr (anticodon: CGT)
614	AT2G04350	-64	+	long-chain acyl-CoA synthetase 8 (LACS8)
615	AT2G04680	-226	+	Cysteine/Histidine-rich C1 domain family protein
615	AT2G04675	-1268	−	unknown protein
617	AT2G17500	-2579	+	Auxin efflux carrier family protein
617	AT2G17490	-2058	−	copia-like retrotransposon family, has a 9.3e-199 P-value blast match to gb|AAO73521.1| gag-pol polyprotein (Glycine max) (SIRE1) (Ty1_Copia-family)
619	AT2G18160	-2172	−	basic leucine-zipper 2 (bZIP2)
619	AT2G18162	-2172	−	conserved peptide upstream open reading frame 1 (CPuORF1)
620	AT2G18170	-406	−	MAP kinase 7 (MPK7)
621	AT2G19460	-953	+	Protein of unknown function (DUF3511)
625	AT2G24570	-1243	−	WRKY DNA-binding protein 17 (WRKY17)
626	AT2G25460	-761	−	CONTAINS InterPro DOMAIN/s: C2 calcium-dependent membrane targeting (InterPro:IPR000008)
626	AT2G25470	-2177	+	receptor like protein 21 (RLP21)
627	AT2G25530	-565	+	AFG1-like ATPase family protein
628	AT2G26260	-2297	+	3beta-hydroxysteroid-dehydrogenase/decarboxylase isoform 2 (3BETAHSD/D2)
628	AT2G26250	-2662	−	3-ketoacyl-CoA synthase 10 (KCS10)
631	AT2G31220	-558	+	basic helix-loop-helix (bHLH) DNA-binding superfamily protein
633	AT2G32930	-3472	−	zinc finger nuclease 2 (ZFN2)
635	AT2G33380	-244	−	RESPONSIVE TO DESSICATION 20 (RD20)
636	AT2G34186	-82	−	unknown protein
636	AT2G34190	-779	+	Xanthine/uracil permease family protein
637	AT2G35710	-465	−	Nucleotide-diphospho-sugar transferases superfamily protein
637	AT2G35720	-1922	+	ORIENTATION UNDER VERY LOW FLUENCES OF LIGHT 1 (OWL1)
641	AT2G36080	-3634	−	AP2/B3-like transcriptional factor family protein
641	AT2G36090	-3353	+	F-box family protein
645	AT2G39450	-170	−	MTP11
645	AT2G39460	-936	+	ribosomal protein L23AA (RPL23AA)
650	AT2G41745	-2060	−	pseudogene, similar to putative reverse transcriptase, blastp match of 28% identity and 4.7e-24 P-value to GP|20279456|gb|AAM18736.1|AC092548_14|AC092548 putative reverse transcriptase {Oryza sativa (japonica cultivar-group)}
653	AT2G43610	-1431	−	Chitinase family protein
655	AT2G44450	-1487	+	beta glucosidase 15 (BGLU15)
655	AT2G44440	-221	−	Emsy N Terminus (ENT) domain-containing protein
656	AT2G44500	-1553	+	O-fucosyltransferase family protein
657	AT2G44740	-1594	−	cyclin p4
658	AT2G45050	-2571	+	GATA transcription factor 2 (GATA2)
662	AT2G46270	-889	+	G-box binding factor 3 (GBF3)
663	AT2G46300	-363	+	Late embryogenesis abundant (LEA) hydroxyproline-rich glycoprotein family
663	AT2G46290	-50	−	Transducin/WD40 repeat-like superfamily protein
664	AT2G46535	-369	+	unknown protein
665	AT2G46590	-1873	+	DOF AFFECTING GERMINATION 2 (DAG2)
665	AT2G46580	-573	−	Pyridoxamine 5'-phosphate oxidase family protein
667	AT2G46790	-231	+	pseudo-response regulator 9 (PRR9)
669	AT2G47430	-4069	−	CYTOKININ-INDEPENDENT 1 (CKI1)
669	AT2G47440	-1564	+	Tetratricopeptide repeat (TPR)-like superfamily protein
671	AT3G03790	-125	+	ankyrin repeat family protein / regulator of chromosome condensation (RCC1) family protein
672	AT3G04855	-12	−	unknown protein
673	AT3G06125	-130	+	other RNA
674	AT3G06770	-1053	−	Pectin lyase-like superfamily protein
675	AT3G06868	-60	+	unknown protein
678	AT3G07360	-1789	+	plant U-box 9 (PUB9)
679	AT3G07390	-1165	+	Auxin-Induced in Root cultures 12 (AIR12)
679	AT3G07380	-2123	−	Domain of unknown function (DUF23)
680	AT3G08020	-1149	−	PHD finger family protein
680	AT3G08030	-1083	+	Protein of unknown function, DUF642
681	AT3G10980	-729	+	PLAC8 family protein
683	AT3G13370	-1148	+	unknown protein
683	AT3G13360	-105	−	WPP domain interacting protein 3 (WIP3)
686	AT3G14590	-109	−	NTMC2T6.2
686	AT3G14595	-848	+	Ribosomal protein L18ae family
688	AT3G15210	-1382	+	ethylene responsive element binding factor 4 (ERF4)
688	AT3G15200	-981	−	Tetratricopeptide repeat (TPR)-like superfamily protein
691	AT3G15510	-1143	+	NAC domain containing protein 2 (NAC2)
695	AT3G16850	-1050	+	Pectin lyase-like superfamily protein
695	AT3G16840	-4377	−	P-loop containing nucleoside triphosphate hydrolases superfamily protein
696	AT3G17110	-1173	+	pseudogene, glycine-rich protein
698	AT3G17580	-959	+	unknown protein
699	AT3G17860	-180	+	jasmonate-zim-domain protein 3 (JAZ3)
699	AT3G17850	-3130	−	Protein kinase superfamily protein
700	AT3G18750	-170	−	with no lysine (K) kinase 6 (WNK6)
701	AT3G19390	-2948	+	Granulin repeat cysteine protease family protein
701	AT3G19380	-3943	−	plant U-box 25 (PUB25)
703	AT3G19820	-2719	−	DWARF 1 (DWF1)
704	AT3G20300	-708	−	Protein of unknown function (DUF3537)
705	AT3G20340	-2657	−	FUNCTIONS IN: molecular_function unknown
705	AT3G20350	-191	+	unknown protein
706	AT3G20820	-577	+	Leucine-rich repeat (LRR) family protein
707	AT3G23060	-2880	+	RING/U-box superfamily protein
708	AT3G23230	-149	−	Integrase-type DNA-binding superfamily protein
710	AT3G23820	-1202	+	UDP-D-glucuronate 4-epimerase 6 (GAE6)
711	AT3G23880	-104	−	F-box and associated interaction domains-containing protein
711	AT3G23890	-1485	+	topoisomerase II (TOPII)
712	AT3G23910	-898	−	BEST Arabidopsis thaliana protein match is: RNA-directed DNA polymerase (reverse transcriptase)-related family protein (TAIR:AT3G24255.2)
712	AT3G23920	-1230	+	beta-amylase 1 (BAM1)
713	AT3G23930	-335	+	unknown protein
715	AT3G25590	-2201	+	unknown protein
719	AT3G44310	-126	+	nitrilase 1 (NIT1)
720	AT3G45230	-290	+	hydroxyproline-rich glycoprotein family protein
720	AT3G45220	-2432	−	Serine protease inhibitor (SERPIN) family protein
721	AT3G45775	-1335	−	copia-like retrotransposon family, has a 9.5e-189 P-value blast match to GB:AAA57005 Hopscotch polyprotein (Ty1_Copia-element) (Zea mays)
721	AT3G45780	-1661	+	phototropin 1 (PHOT1)
723	AT3G46700	-2228	−	UDP-Glycosyltransferase superfamily protein
725	AT3G47630	-2085	−	CONTAINS InterPro DOMAIN/s: Mitochondrial matrix Mmp37 (InterPro:IPR015222)
725	AT3G47640	-84	+	POPEYE (PYE)
727	AT3G48060	-2146	−	BAH domain
727	AT3G48070	-72	+	RING/U-box superfamily protein
728	AT3G48270	-1074	+	cytochrome P450, family 71, subfamily A, polypeptide 26 (CYP71A26)
728	AT3G48260	-278	−	with no lysine (K) kinase 3 (WNK3)
729	AT3G49120	-1751	+	peroxidase CB (PRXCB)
730	AT3G49810	-227	−	ARM repeat superfamily protein
730	AT3G49820	-4177	+	unknown protein
732	AT3G49950	-4034	+	GRAS family transcription factor
734	AT3G50660	-3865	−	DWARF 4 (DWF4)
734	AT3G50665	-4932	+	tRNA-Glu (anticodon: TTC)
740	AT3G53380	-127	−	Concanavalin A-like lectin protein kinase family protein
741	AT3G53390	-215	+	Transducin/WD40 repeat-like superfamily protein
742	AT3G53820	-2252	+	C2H2 and C2HC zinc fingers superfamily protein
742	AT3G53810	-1221	−	Concanavalin A-like lectin protein kinase family protein
748	AT3G55240	-151	−	FUNCTIONS IN: molecular_function unknown
748	AT3G55250	-4376	+	unknown protein
749	AT3G55610	-1025	−	delta 1-pyrroline-5-carboxylate synthase 2 (P5CS2)
749	AT3G55620	-4085	+	embryo defective 1624 (emb1624)
750	AT3G56275	-233	+	expressed protein
752	AT3G58060	-358	−	Cation efflux family protein
753	AT3G58620	-1392	+	tetratricopetide-repeat thioredoxin-like 4 (TTL4)
756	AT3G59930	-1896	−	FUNCTIONS IN: molecular_function unknown
756	AT3G59940	-685	+	Galactose oxidase/kelch repeat superfamily protein
759	AT3G61460	-263	−	brassinosteroid-responsive RING-H2 (BRH1)
759	AT3G61470	-3107	+	photosystem I light harvesting complex gene 2 (LHCA2)
760	AT3G61640	-754	−	arabinogalactan protein 20 (AGP20)
761	AT3G62090	-485	−	phytochrome interacting factor 3-like 2 (PIL2)
774	AT4G11600	-141	−	glutathione peroxidase 6 (GPX6)
776	AT4G12130	-45	+	Glycine cleavage T-protein family
776	AT4G12120	-2375	−	SEC1B
782	AT4G18150	-595	+	Kinase-related protein of unknown function (DUF1296)
782	AT4G18140	-223	−	SCP1-like small phosphatase 4b (SSP4b)
783	AT4G18230	-41	−	FUNCTIONS IN: molecular_function unknown
783	AT4G18240	-129	+	starch synthase 4 (SS4)
784	AT4G18630	-1342	+	Protein of unknown function (DUF688)
786	AT4G18890	-529	+	BES1/BZR1 homolog 3 (BEH3)
786	AT4G18880	-2532	−	heat shock transcription factor A4A (HSF A4A)
787	AT4G19040	-414	−	ENHANCED DISEASE RESISTANCE 2 (EDR2)
794	AT4G23440	-4469	+	Disease resistance protein (TIR-NBS class)
797	AT4G25470	-151	−	C-repeat/DRE binding factor 2 (CBF2)
798	AT4G25480	-2207	−	dehydration response element B1A (DREB1A)
799	AT4G25530	-1728	+	FLOWERING WAGENINGEN (FWA)
799	AT4G25520	-420	−	SEUSS-like 1 (SLK1)
802	AT4G28630	-555	−	ABC transporter of the mitochondrion 1 (ATM1)
802	AT4G28640	-623	+	indole-3-acetic acid inducible 11 (IAA11)
804	AT4G29150	-4275	+	IQ-domain 25 (IQD25)
806	AT4G30074	-1127	−	low-molecular-weight cysteine-rich 19 (LCR19)
807	AT4G31080	-13	+	Protein of unknown function (DUF2296)
812	AT4G34530	-641	+	cryptochrome-interacting basic-helix-loop-helix 1 (CIB1)
812	AT4G34540	-641	+	NmrA-like negative transcriptional regulator family protein
815	AT4G36010	-66	−	Pathogenesis-related thaumatin superfamily protein
817	AT4G36670	-692	−	Major facilitator superfamily protein
818	AT4G36730	-49	−	G-box binding factor 1 (GBF1)
819	AT4G36740	-2785	−	homeobox protein 40 (HB40)
820	AT4G36780	-141	−	BES1/BZR1 homolog 2 (BEH2)
820	AT4G36790	-1683	+	Major facilitator superfamily protein
821	AT4G36880	-2404	−	cysteine proteinase1 (CP1)
822	AT4G37250	-4751	−	Leucine-rich repeat protein kinase family protein
823	AT4G37550	-2301	+	Acetamidase/Formamidase family protein
823	AT4G37540	-616	−	LOB domain-containing protein 39 (LBD39)
825	AT4G37790	-824	+	HAT22
826	AT4G37940	-1627	−	AGAMOUS-like 21 (AGL21)
826	AT4G37950	-4183	+	Rhamnogalacturonate lyase family protein
827	AT4G38860	-563	+	SAUR-like auxin-responsive protein family
829	AT4G39770	-237	−	Haloacid dehalogenase-like hydrolase (HAD) superfamily protein
830	AT5G01380	-1765	−	Homeodomain-like superfamily protein
833	AT5G03140	-133	−	Concanavalin A-like lectin protein kinase family protein
837	AT5G04090	-124	−	Plant protein 1589 of unknown function
838	AT5G04840	-1352	+	bZIP protein
838	AT5G04830	-98	−	Nuclear transport factor 2 (NTF2) family protein
839	AT5G05250	-391	−	unknown protein
840	AT5G05440	-768	+	PYRABACTIN RESISTANCE 1-LIKE 5 (PYL5)
841	AT5G07070	-1650	−	CBL-interacting protein kinase 2 (CIPK2)
841	AT5G07080	-569	+	HXXXD-type acyl-transferase family protein
843	AT5G13260	-1798	+	unknown protein
846	AT5G13820	-348	+	telomeric DNA binding protein 1 (TBP1)
849	AT5G16120	-203	+	alpha/beta-Hydrolases superfamily protein
849	AT5G16110	-2591	−	unknown protein
850	AT5G16270	-84	+	sister chromatid cohesion 1 protein 4 (SYN4)
851	AT5G17230	-1410	−	PHYTOENE SYNTHASE (PSY)
851	AT5G17240	-2578	+	SET domain group 40 (SDG40)
853	AT5G17640	-1387	−	Protein of unknown function (DUF1005)
854	AT5G17760	-857	−	P-loop containing nucleoside triphosphate hydrolases superfamily protein
855	AT5G17800	-2066	+	myb domain protein 56 (MYB56)
855	AT5G17790	-2406	−	VARIEGATED 3 (VAR3)
856	AT5G18030	-210	+	SAUR-like auxin-responsive protein family
856	AT5G18020	-1549	−	SAUR-like auxin-responsive protein family
857	AT5G18270	-3344	−	Arabidopsis NAC domain containing protein 87 (ANAC087)
860	AT5G18610	-3142	+	Protein kinase superfamily protein
861	AT5G18860	-1334	+	inosine-uridine preferring nucleoside hydrolase family protein
862	AT5G18920	-220	+	Cox19-like CHCH family protein
862	AT5G18910	-426	−	Protein kinase superfamily protein
867	AT5G20630	-125	−	germin 3 (GER3)
869	AT5G21990	-1776	+	Tetratricopeptide repeat (TPR)-like superfamily protein
872	AT5G26190	-1705	−	Cysteine/Histidine-rich C1 domain family protein
872	AT5G26200	-140	+	Mitochondrial substrate carrier family protein
873	AT5G26340	-130	−	MSS1
873	AT5G26345	-2262	+	Mutator-like transposase family, has a 1.9e-43 P-value blast match to GB:AAA21566 mudrA of transposon="MuDR" (MuDr-element) (Zea mays)
875	AT5G28145	-752	+	copia-like retrotransposon family, has a 4.1e-195 P-value blast match to GB:AAA57005 Hopscotch polyprotein (Ty1_Copia-element) (Zea mays)
875	AT5G28143	-3702	−	pseudogene, hypothetical protein
877	AT5G28622	-2678	+	non-LTR retrotransposon family (LINE), has a 1.1e-21 P-value blast match to GB:NP_038602 L1 repeat, Tf subfamily, member 18 (LINE-element) (Mus musculus)
877	AT5G28620	-913	−	protein kinase C-related
879	AT5G36250	-528	+	Protein phosphatase 2C family protein
879	AT5G36240	-2652	−	zinc knuckle (CCHC-type) family protein
880	AT5G37260	-156	−	REVEILLE 2 (RVE2)
882	AT5G40630	-1220	−	Ubiquitin-like superfamily protein
882	AT5G40640	-3353	+	unknown protein
883	AT5G40855	-869	−	unknown protein
883	AT5G40860	-150	+	unknown protein
885	AT5G42677	-767	+	Pseudogene of AT5G19630
886	AT5G43150	-1063	+	unknown protein
887	AT5G43745	-1021	−	Protein of unknown function (DUF1012)
889	AT5G45340	-92	−	cytochrome P450, family 707, subfamily A, polypeptide 3 (CYP707A3)
890	AT5G47040	-924	−	lon protease 2 (LON2)
891	AT5G47180	-315	−	Plant VAMP (vesicle-associated membrane protein) family protein
892	AT5G47390	-1260	+	myb-like transcription factor family protein
892	AT5G47380	-940	−	Protein of unknown function, DUF547
893	AT5G47420	-55	+	Tryptophan RNA-binding attenuator protein-like
895	AT5G48545	-39	+	histidine triad nucleotide-binding 3 (HINT3)
899	AT5G52570	-250	−	beta-carotene hydroxylase 2 (BETA-OHASE 2)
899	AT5G52580	-801	+	RabGAP/TBC domain-containing protein
904	AT5G54390	-3342	+	HAL2-like (HL)
904	AT5G54380	-2777	−	THESEUS1 (THE1)
906	AT5G54800	-2447	+	glucose 6-phosphate/phosphate translocator 1 (GPT1)
906	AT5G54790	-3162	−	unknown protein
907	AT5G54960	-260	−	pyruvate decarboxylase-2 (PDC2)
907	AT5G54970	-190	+	unknown protein
910	AT5G59480	-12	−	Haloacid dehalogenase-like hydrolase (HAD) superfamily protein
912	AT5G60850	-1549	+	OBF binding protein 4 (OBP4)
915	AT5G62500	-343	+	end binding protein 1B (EB1B)
916	AT5G63520	-2485	−	CONTAINS InterPro DOMAIN/s: F-box domain, Skp2-like (InterPro:IPR022364), FIST C domain (InterPro:IPR019494), FIST domain, N-terminal (InterPro:IPR013702)
916	AT5G63530	-1558	+	farnesylated protein 3 (FP3)
917	AT5G63660	-1111	+	PDF2.5
917	AT5G63650	-863	−	SNF1-related protein kinase 2.5 (SNRK2.5)
918	AT5G63970	-43	−	Copine (Calcium-dependent phospholipid-binding protein) family
918	AT5G63980	-523	+	SAL1
919	AT5G64210	-305	−	alternative oxidase 2 (AOX2)
919	AT5G64220	-278	+	Calmodulin-binding transcription activator protein with CG-1 and Ankyrin domains
922	AT5G64530	-1305	+	xylem NAC domain 1 (XND1)
926	AT5G65460	-3044	−	kinesin like protein for actin based chloroplast movement 2 (KAC2)
926	AT5G65470	-87	+	O-fucosyltransferase family protein
928	AT5G66590	-113	+	CAP (Cysteine-rich secretory proteins, Antigen 5, and Pathogenesis-related 1 protein) superfamily protein
929	AT5G66700	-2012	+	homeobox 53 (HB53)
934	AT1G08880	-493	−	H2AXA
934	AT1G08890	-56	+	Major facilitator superfamily protein
940	AT1G15670	-1361	+	Galactose oxidase/kelch repeat superfamily protein
941	AT1G16160	-320	+	wall associated kinase-like 5 (WAKL5)
943	AT1G21835	-666	+	Plant thionin family protein
943	AT1G21830	-2391	−	unknown protein
944	AT1G22360	-104	−	UDP-glucosyl transferase 85A2 (UGT85A2)
946	AT1G28130	-115	+	GH3.17
947	AT1G29500	-124	+	SAUR-like auxin-responsive protein family
949	AT1G32660	-998	+	F-box and associated interaction domains-containing protein
952	AT1G49780	-2666	−	plant U-box 26 (PUB26)
956	AT1G65840	-2556	+	polyamine oxidase 4 (PAO4)
956	AT1G65830	-152	−	tRNA-Ser (anticodon: AGA)
959	AT1G70300	-3344	−	K+ uptake permease 6 (KUP6)
960	AT1G76890	-892	−	GT2
963	AT2G01680	-1893	+	Ankyrin repeat family protein
968	AT2G16365	-272	+	F-box family protein
971	AT2G18780	-1505	−	F-box and associated interaction domains-containing protein
971	AT2G18790	-259	+	phytochrome B (PHYB)
972	AT2G19806	-1420	+	Mariner-like transposase family, has a 1.2e-19 P-value blast match to GB:AAC28384 mariner transposase (Mariner_TC1-element) (Glycine max)
973	AT2G21510	-1591	−	DNAJ heat shock N-terminal domain-containing protein
973	AT2G21520	-1268	+	Sec14p-like phosphatidylinositol transfer family protein
974	AT2G22795	-2932	−	unknown protein
977	AT2G31010	-31	+	Protein kinase superfamily protein
978	AT2G31740	-1215	−	S-adenosyl-L-methionine-dependent methyltransferases superfamily protein
978	AT2G31750	-909	+	UDP-glucosyl transferase 74D1 (UGT74D1)
981	AT2G34650	-193	−	PINOID (PID)
981	AT2G34655	-4651	+	unknown protein
982	AT2G39200	-2136	−	MILDEW RESISTANCE LOCUS O 12 (MLO12)
983	AT2G41070	-522	+	ENHANCED EM LEVEL (EEL)
986	AT2G42660	-1909	−	Homeodomain-like superfamily protein
988	AT2G46770	-4903	−	EMBRYO DEFECTIVE 2301 (EMB2301)
988	AT2G46780	-1475	+	RNA-binding (RRM/RBD/RNP motifs) family protein
990	AT3G06060	-649	−	NAD(P)-binding Rossmann-fold superfamily protein
992	AT3G10960	-1980	−	AZA-guanine resistant1 (AZG1)
993	AT3G11920	-1712	+	glutaredoxin-related
993	AT3G11910	-187	−	ubiquitin-specific protease 13 (UBP13)
996	AT3G14450	-3622	+	CTC-interacting domain 9 (CID9)
997	AT3G18830	-356	−	polyol/monosaccharide transporter 5 (PMT5)
997	AT3G18840	-4570	+	Tetratricopeptide repeat (TPR)-like superfamily protein
999	AT3G20910	-112	+	nuclear factor Y, subunit A9 (NF-YA9)
999	AT3G20900	-1601	−	unknown protein
1000	AT3G21700	-632	+	SGP2
1001	AT3G23050	-46	+	indole-3-acetic acid 7 (IAA7)
1003	AT3G30775	-2719	−	EARLY RESPONSIVE TO DEHYDRATION 5 (ERD5)
1004	AT3G43431	-1190	−	unknown protein
1009	AT3G50060	-4231	−	myb domain protein 77 (MYB77)
1013	AT3G58120	-180	−	BZIP61
1013	AT3G58130	-4134	+	N-acetylglucosaminylphosphatidylinositol de-N-acetylase family protein
1017	AT4G14470	-3683	+	non-LTR retrotransposon family (LINE), has a 2.1e-25 P-value blast match to GB:AAB41224 ORF2 (LINE-element) (Rattus norvegicus)
1019	AT4G14560	-2832	+	indole-3-acetic acid inducible (IAA1)
1020	AT4G15000	-1131	+	Ribosomal L27e protein family
1020	AT4G14990	-889	−	Topoisomerase II-associated protein PAT1
1021	AT4G15230	-43	+	pleiotropic drug resistance 2 (PDR2)
1023	AT4G16760	-953	−	acyl-CoA oxidase 1 (ACX1)
1028	AT4G20240	-4635	−	cytochrome P450, family 71, subfamily A, polypeptide 27 (CYP71A27)
1028	AT4G20260	-1893	+	plasma-membrane associated cation-binding protein 1 (PCAP1)
1030	AT4G25630	-863	+	fibrillarin 2 (FIB2)
1030	AT4G25620	-3592	−	hydroxyproline-rich glycoprotein family protein
1043	AT4G39640	-32	+	gamma-glutamyl transpeptidase 1 (GGT1)
1043	AT4G39630	-537	−	unknown protein
1044	AT5G03330	-890	+	Cysteine proteinases superfamily protein
1047	AT5G16023	-1234	−	ROTUNDIFOLIA like 18 (RTFL18)
1047	AT5G16030	-4059	+	unknown protein
1050	AT5G21940	-1624	−	unknown protein
1051	AT5G25190	-3441	−	Integrase-type DNA-binding superfamily protein
1055	AT5G42900	-54	−	cold regulated gene 27
1057	AT5G45100	-2893	+	SBP (S-ribonuclease binding protein) family protein
1061	AT5G58320	-197	+	Kinase interacting (KIP1-like) family protein
1061	AT5G58310	-1159	−	methyl esterase 18 (MES18)
