# Supplementary material for: A Quartet of PIF bHLH Factors Provides a Transcriptionally Centered Signaling Hub That Regulates Seedling Morphogenesis through Differential Expression-Patterning of Shared Target Genes in Arabidopsis
Source: PLoS Genet. 2013 Jan 31;9(1):e1003244. doi: 10.1371/journal.pgen.1003244 (PMC3561105; doi:10.1371/journal.pgen.1003244)
Supplement: Table S8 — List of SSTF genes from pifq/pif3 comparison (PIF1/4/5-trio-regulated genes (gain-of-function)). (XLS) [file pgen.1003244.s015.xls]

## Sheet: Table_S8
Table S8. List of SSTF genes from pifq/pif3 comparison (PIF1/4/5-trio-regulated genes (gain-of-function)).
Locus	logFC (pifq/pif3)	P value	FDR	Description
AT1G01120	-1.30314	1.01928e-05	0.000443288	3-ketoacyl-CoA synthase 1 (KCS1)
AT1G01390	-1.01613	0.00177588	0.0295613	UDP-Glycosyltransferase superfamily protein
AT1G01470	-1.02149	0.00056709	0.0121395	LATE EMBRYOGENESIS ABUNDANT 14 (LEA14)
AT1G01520	-2.89979	0.000268603	0.00677075	Homeodomain-like superfamily protein
AT1G01600	-1.10008	0.000780921	0.0156227	cytochrome P450, family 86, subfamily A, polypeptide 4 (CYP86A4)
AT1G01620	-1.01636	0.000518092	0.0112771	plasma membrane intrinsic protein 1C (PIP1C)
AT1G01780	-1.30156	2.22457e-05	0.000872618	GATA type zinc finger transcription factor family protein
AT1G02190	-3.6499	0.00195167	0.0314872	Fatty acid hydroxylase superfamily
AT1G02205	-1.22188	3.95201e-05	0.00142337	ECERIFERUM 1 (CER1)
AT1G02340	-4.1697	2.83766e-34	6.24456e-31	LONG HYPOCOTYL IN FAR-RED (HFR1)
AT1G02400	-1.04401	0.000422034	0.00958439	gibberellin 2-oxidase 6 (GA2OX6)
AT1G02610	-1.11615	0.00192457	0.0312331	RING/FYVE/PHD zinc finger superfamily protein
AT1G02700	-1.39753	1.74762e-05	0.000709561	unknown protein
AT1G02730	1.22801	0.000118146	0.00351817	cellulose synthase-like D5 (CSLD5)
AT1G02800	-1.57126	2.01338e-07	1.45267e-05	cellulase 2 (CEL2)
AT1G02820	2.16058	0.00116769	0.021184	Late embryogenesis abundant 3 (LEA3) family protein
AT1G03090	-1.95444	1.60914e-10	2.2271e-08	MCCA
AT1G03106	-1.47999	6.4691e-07	4.13835e-05	unknown protein
AT1G03120	-1.634	5.44439e-05	0.00182081	responsive to abscisic acid 28 (RAB28)
AT1G03130	1.21766	3.50754e-05	0.00128287	photosystem I subunit D-2 (PSAD-2)
AT1G03170	-4.96335	6.06255e-11	9.39525e-09	Protein of unknown function (DUF3049)
AT1G03780	1.23227	0.000951145	0.0182441	targeting protein for XKLP2 (TPX2)
AT1G03790	-1.527	3.07828e-07	2.14369e-05	SOMNUS (SOM)
AT1G03800	-2.43183	1.28549e-08	1.24072e-06	ERF domain protein 10 (ERF10)
AT1G04220	-1.11951	0.000227888	0.00597012	3-ketoacyl-CoA synthase 2 (KCS2)
AT1G04240	-1.27748	1.5825e-05	0.000652689	SHORT HYPOCOTYL 2 (SHY2)
AT1G04310	-1.20388	6.59883e-05	0.00216737	ethylene response sensor 2 (ERS2)
AT1G04635	1.00146	0.00126061	0.0223898	EMBRYO DEFECTIVE 1687 (EMB1687)
AT1G04660	1.78516	7.85811e-09	7.96892e-07	glycine-rich protein
AT1G04800	1.12087	0.000144009	0.00412101	glycine-rich protein
AT1G05440	1.06248	0.00224424	0.0349764	C-8 sterol isomerases
AT1G05490	-1.49937	3.11672e-06	0.000162527	chromatin remodeling 31 (chr31)
AT1G05560	-1.42786	1.93124e-06	0.000106247	UDP-glucosyltransferase 75B1 (UGT75B1)
AT1G05650	2.10618	0.000320621	0.00785677	Pectin lyase-like superfamily protein
AT1G05835	-1.32401	9.65425e-06	0.000424055	PHD finger protein
AT1G05990	1.55157	0.0018772	0.0306451	EF hand calcium-binding protein family
AT1G06160	1.50129	2.74606e-05	0.00103476	octadecanoid-responsive Arabidopsis AP2/ERF 59 (ORA59)
AT1G06320	-2.50387	6.78757e-05	0.00221285	unknown protein
AT1G06570	-2.03221	3.82709e-11	6.1489e-09	phytoene desaturation 1 (PDS1)
AT1G06680	1.09853	0.00018208	0.00497746	photosystem II subunit P-1 (PSBP-1)
AT1G06830	2.9025	2.87166e-15	8.53969e-13	Glutaredoxin family protein
AT1G06980	-1.54931	2.58913e-07	1.83795e-05	unknown protein
AT1G07150	-1.04907	0.00130948	0.0230715	mitogen-activated protein kinase kinase kinase 13 (MAPKKK13)
AT1G07645	-1.40099	0.000514242	0.0112155	dessication-induced 1VOC superfamily protein (DSI-1VOC)
AT1G07880	1.49004	0.000162623	0.00459394	ATMPK13
AT1G07985	-1.03894	0.000400843	0.00924124	Expressed protein
AT1G08090	-2.95944	0.000174577	0.00482632	nitrate transporter 2:1 (NRT2:1)
AT1G08380	1.58156	9.93127e-08	7.74991e-06	photosystem I subunit O (PSAO)
AT1G08500	-1.04132	0.000413352	0.00946424	early nodulin-like protein 18 (ENODL18)
AT1G08560	1.00866	0.000886864	0.0172406	syntaxin of plants 111 (SYP111)
AT1G08630	-2.99393	5.02744e-16	1.72866e-13	threonine aldolase 1 (THA1)
AT1G09570	-1.00666	0.000591889	0.0125483	phytochrome A (PHYA)
AT1G09610	1.35987	0.00278205	0.0414221	Protein of unknown function (DUF579)
AT1G10070	-3.57952	1.10112e-27	1.61542e-24	branched-chain amino acid transaminase 2 (BCAT-2)
AT1G10550	-1.11377	0.000271824	0.00684293	xyloglucan:xyloglucosyl transferase 33 (XTH33)
AT1G10657	2.96966	1.15217e-13	2.72632e-11	Plant protein 1589 of unknown function
AT1G10810	1.03484	0.00106932	0.0198579	NAD(P)-linked oxidoreductase superfamily protein
AT1G11112	1.62081	1.39966e-06	8.14837e-05	unknown protein
AT1G11160	1.54633	0.000204814	0.00548314	Transducin/WD40 repeat-like superfamily protein
AT1G11260	-1.20149	4.42742e-05	0.00155143	sugar transporter 1 (STP1)
AT1G11300	1.76921	0.000411948	0.00945289	protein serine/threonine kinases
AT1G11330	1.53883	7.80044e-06	0.000358364	S-locus lectin protein kinase family protein
AT1G11700	1.13751	0.000194182	0.00526253	Protein of unknown function, DUF584
AT1G11960	-1.27639	0.000376994	0.00883506	ERD (early-responsive to dehydration stress) family protein
AT1G12080	-1.86296	4.8873e-10	6.2529e-08	Vacuolar calcium-binding protein-related
AT1G12420	-1.02376	0.00102218	0.0192258	ACT domain repeat 8 (ACR8)
AT1G12610	-2.14425	0.000535262	0.011574	DWARF AND DELAYED FLOWERING 1 (DDF1)
AT1G12805	1.24155	2.71493e-05	0.00103186	nucleotide binding
AT1G12900	1.30905	9.07515e-06	0.000404267	glyceraldehyde 3-phosphate dehydrogenase A subunit 2 (GAPA-2)
AT1G13340	-1.62522	8.68274e-06	0.000389149	Regulator of Vps4 activity in the MVB pathway protein
AT1G13420	1.28424	1.983e-05	0.000790543	sulfotransferase 4B (ST4B)
AT1G13448	1.35478	0.000263488	0.0066801	other RNA
AT1G13700	1.03652	0.00111912	0.0204735	6-phosphogluconolactonase 1 (PGL1)
AT1G13790	1.10294	0.00237866	0.036656	XH/XS domain-containing protein
AT1G14345	1.28031	1.58679e-05	0.000652689	NAD(P)-linked oxidoreductase superfamily protein
AT1G14350	-1.64597	1.49001e-07	1.10031e-05	FOUR LIPS (FLP)
AT1G14430	1.27247	8.73868e-05	0.00275902	glyoxal oxidase-related protein
AT1G14860	-1.14189	0.000203682	0.00545947	nudix hydrolase homolog 18 (NUDT18)
AT1G14890	-1.03802	0.000425047	0.00962302	Plant invertase/pectin methylesterase inhibitor superfamily protein
AT1G14930	-2.76668	5.82376e-15	1.66438e-12	Polyketide cyclase/dehydrase and lipid transport superfamily protein
AT1G14950	-1.52075	8.05916e-07	5.00988e-05	Polyketide cyclase/dehydrase and lipid transport superfamily protein
AT1G14960	1.03488	0.000806519	0.0160038	Polyketide cyclase/dehydrase and lipid transport superfamily protein
AT1G14980	1.0004	0.000638008	0.013397	chaperonin 10 (CPN10)
AT1G15010	-1.54757	2.25024e-06	0.000121668	unknown protein
AT1G15040	-2.0054	3.82805e-11	6.1489e-09	Class I glutamine amidotransferase-like superfamily protein
AT1G15175	1.01021	0.00121707	0.0218814	other RNA
AT1G15330	-1.83842	1.63697e-09	1.8762e-07	Cystathionine beta-synthase (CBS) protein
AT1G15460	2.00334	0.000398447	0.00922972	REQUIRES HIGH BORON 4 (BOR4)
AT1G15580	1.42966	0.000161039	0.00456091	indole-3-acetic acid inducible 5 (IAA5)
AT1G15800	-1.14144	0.000217505	0.0057529	unknown protein
AT1G15820	1.7957	1.85761e-09	2.09634e-07	light harvesting complex photosystem II subunit 6 (LHCB6)
AT1G16130	-1.59269	0.000337862	0.00817033	wall associated kinase-like 2 (WAKL2)
AT1G16400	3.31417	8.55549e-18	3.69161e-15	cytochrome P450, family 79, subfamily F, polypeptide 2 (CYP79F2)
AT1G16445	1.02453	0.00123129	0.0220829	S-adenosyl-L-methionine-dependent methyltransferases superfamily protein
AT1G16490	-1.34876	6.71618e-05	0.00219282	myb domain protein 58 (MYB58)
AT1G16635	1.20242	0.000644036	0.0135106	unknown gene
AT1G16730	-1.37938	8.15386e-06	0.000371012	unknown protein 6 (UP6)
AT1G16850	-3.17411	6.41964e-22	4.29701e-19	unknown protein
AT1G17300	-1.0266	0.00173485	0.0289659	unknown protein
AT1G17345	1.35794	0.000276155	0.00690576	SAUR-like auxin-responsive protein family
AT1G17810	-2.16894	2.37193e-12	4.34973e-10	beta-tonoplast intrinsic protein (BETA-TIP)
AT1G18060	1.00986	0.00109384	0.0201768	unknown protein
AT1G18250	1.02729	0.000685961	0.0141077	ATLP-1
AT1G18400	-1.29632	0.000266439	0.00673939	BR enhanced expression 1 (BEE1)
AT1G18570	-1.46544	4.88166e-06	0.000239256	myb domain protein 51 (MYB51)
AT1G18810	1.17643	0.000343134	0.00826149	phytochrome kinase substrate-related
AT1G19510	-2.00621	2.58369e-10	3.48815e-08	RAD-like 5 (RL5)
AT1G19530	-1.76917	3.39165e-09	3.62313e-07	unknown protein
AT1G19940	-1.54723	1.95237e-06	0.000107142	glycosyl hydrolase 9B5 (GH9B5)
AT1G20190	-1.21085	4.0494e-05	0.00144661	expansin 11 (EXPA11)
AT1G20450	-1.0406	0.000396965	0.00921478	EARLY RESPONSIVE TO DEHYDRATION 10 (ERD10)
AT1G20520	-3.17245	0.00152688	0.0262229	Arabidopsis protein of unknown function (DUF241)
AT1G20790	-2.23827	0.000267444	0.00675703	F-box family protein
AT1G20823	1.02316	0.00109481	0.020177	RING/U-box superfamily protein
AT1G20900	-1.26097	2.06373e-05	0.000819755	ESCAROLA (ESC)
AT1G21400	-2.14562	1.13785e-10	1.64734e-08	Thiamin diphosphate-binding fold (THDP-binding) superfamily protein
AT1G21500	1.45555	1.48419e-06	8.55004e-05	unknown protein
AT1G21520	1.13768	0.000255752	0.00651397	unknown protein
AT1G21680	-1.71787	1.59436e-08	1.46801e-06	DPP6 N-terminal domain-like protein
AT1G22220	2.21508	1.87341e-08	1.70356e-06	F-box family protein
AT1G22400	1.02774	0.000515578	0.0112335	UGT85A1
AT1G22590	1.22482	4.59075e-05	0.00159093	AGAMOUS-like 87 (AGL87)
AT1G22600	-1.2333	4.15728e-05	0.00147557	Late embryogenesis abundant protein (LEA) family protein
AT1G22740	-1.05362	0.000397918	0.00922716	RAB GTPase homolog G3B (RABG3B)
AT1G22890	-1.42781	5.08695e-05	0.00172752	unknown protein
AT1G22980	1.35594	0.000234342	0.0060809	unknown protein
AT1G23052	-1.82129	1.28673e-09	1.50616e-07	unknown gene
AT1G23100	1.48087	1.36039e-06	7.96006e-05	GroES-like family protein
AT1G23130	2.63916	4.02013e-15	1.16404e-12	Polyketide cyclase/dehydrase and lipid transport superfamily protein
AT1G23210	1.74451	0.00125452	0.0223177	glycosyl hydrolase 9B6 (GH9B6)
AT1G23790	1.71673	1.96159e-05	0.000783424	Plant protein of unknown function (DUF936)
AT1G24020	2.20849	3.67337e-13	7.84818e-11	MLP-like protein 423 (MLP423)
AT1G24095	1.10058	0.000888676	0.0172605	Putative thiol-disulphide oxidoreductase DCC
AT1G24280	1.00983	0.00233552	0.0361177	glucose-6-phosphate dehydrogenase 3 (G6PD3)
AT1G24530	1.14047	0.000128372	0.00375653	Transducin/WD40 repeat-like superfamily protein
AT1G25440	1.38937	4.94621e-06	0.000241881	B-box type zinc finger protein with CCT domain
AT1G26250	1.48672	6.80316e-06	0.000319212	Proline-rich extensin-like family protein
AT1G26290	-1.50123	4.7928e-07	3.18493e-05	unknown protein
AT1G26360	1.34178	0.000170343	0.00474503	methyl esterase 13 (MES13)
AT1G26380	-1.3078	0.00180587	0.0299021	FAD-binding Berberine family protein
AT1G26730	-1.42934	0.000277828	0.00692399	EXS (ERD1/XPR1/SYG1) family protein
AT1G26761	4.1311	8.16275e-29	1.28307e-25	Arabinanase/levansucrase/invertase
AT1G26762	1.35649	0.000721715	0.0146649	unknown protein
AT1G26770	1.07944	0.000326219	0.00795874	expansin A10 (EXPA10)
AT1G26840	1.01083	0.00181302	0.0299754	origin recognition complex protein 6 (ORC6)
AT1G26945	-1.13288	0.00022251	0.00585713	KIDARI (KDR)
AT1G27030	1.01879	0.000859	0.0168327	unknown protein
AT1G27461	-1.41442	1.14953e-05	0.000493112	unknown protein
AT1G27670	-1.06371	0.000459256	0.0102499	unknown protein
AT1G27990	-1.24426	0.000846166	0.0166569	unknown protein
AT1G28330	-1.786	2.23469e-09	2.48366e-07	dormancy-associated protein-like 1
AT1G28450	-1.94572	2.85081e-05	0.00106551	AGAMOUS-like 58 (AGL58)
AT1G28570	1.43983	1.60915e-06	9.19765e-05	SGNH hydrolase-type esterase superfamily protein
AT1G28610	2.60882	0.00290195	0.0426303	GDSL-like Lipase/Acylhydrolase superfamily protein
AT1G29195	-1.68225	3.95708e-08	3.42833e-06	unknown protein
AT1G29395	-2.14716	0.00046807	0.0104255	COLD REGULATED 314 INNER MEMBRANE 1 (COR413IM1)
AT1G29660	1.83767	1.80243e-09	2.04455e-07	GDSL-like Lipase/Acylhydrolase superfamily protein
AT1G29910	4.20602	4.18559e-37	1.02342e-33	chlorophyll A/B binding protein 3 (CAB3)
AT1G29920	5.45623	1.42058e-54	7.81532e-51	chlorophyll A/B-binding protein 2 (CAB2)
AT1G29930	2.32347	2.23167e-14	5.64486e-12	chlorophyll A/B binding protein 1 (CAB1)
AT1G30080	-1.96962	3.1622e-06	0.000164121	Glycosyl hydrolase superfamily protein
AT1G30170	2.2373	2.5404e-07	1.80919e-05	Protein of unknown function (DUF295)
AT1G30250	2.21074	4.98304e-05	0.0017001	unknown protein
AT1G30380	1.63942	3.53907e-08	3.11523e-06	photosystem I subunit K (PSAK)
AT1G30515	-1.18132	0.00269437	0.0404449	unknown protein
AT1G30530	1.05843	0.000368705	0.00869637	UDP-glucosyl transferase 78D1 (UGT78D1)
AT1G30600	1.00635	0.00104912	0.0196317	Subtilase family protein
AT1G30720	-1.15215	0.000105033	0.00318369	FAD-binding Berberine family protein
AT1G30730	-1.29441	1.91243e-05	0.000765181	FAD-binding Berberine family protein
AT1G30760	-1.13915	0.000213396	0.00565783	FAD-binding Berberine family protein
AT1G31040	-1.45843	6.48068e-06	0.000307357	PLATZ transcription factor family protein
AT1G31173	-1.52481	2.58881e-05	0.00098905	MIR167D
AT1G31310	-1.20465	0.000847912	0.01666	hydroxyproline-rich glycoprotein family protein
AT1G31330	1.49057	4.80505e-07	3.18493e-05	photosystem I subunit F (PSAF)
AT1G31550	1.57753	0.000395973	0.00920145	GDSL-like Lipase/Acylhydrolase superfamily protein
AT1G31580	3.03392	3.89011e-21	2.37794e-18	ECS1
AT1G32170	-1.43544	1.26639e-06	7.47137e-05	xyloglucan endotransglucosylase/hydrolase 30 (XTH30)
AT1G33600	1.38808	4.70129e-06	0.000231447	Leucine-rich repeat (LRR) family protein
AT1G33750	1.08121	0.00122521	0.0220098	Terpenoid cyclases/Protein prenyltransferases superfamily protein
AT1G34245	1.87719	2.84207e-08	2.53208e-06	EPIDERMAL PATTERNING FACTOR 2 (EPF2)
AT1G34330	26.949	0.00161056	0.0272631	pseudogene, putative peroxidase, similar to anionic peroxidase GI:559235 from (Petroselinum crispum)
AT1G34630	-1.14747	0.000143557	0.00411879	BEST Arabidopsis thaliana protein match is: Mitochondrial import inner membrane translocase subunit Tim17/Tim22/Tim23 family protein (TAIR:AT5G51150.1)
AT1G35115	-1.59656	0.000349425	0.00834901	copia-like retrotransposon family, has a 1.1e-168 P-value blast match to gb|AAO73527.1| gag-pol polyprotein (Glycine max) (SIRE1) (Ty1_Copia-family)
AT1G35230	-1.17442	0.00219772	0.0343001	arabinogalactan protein 5 (AGP5)
AT1G35290	4.42954	1.09253e-15	3.53562e-13	Thioesterase superfamily protein
AT1G36180	1.87939	6.9241e-07	4.36596e-05	acetyl-CoA carboxylase 2 (ACC2)
AT1G43780	1.5793	8.25353e-06	0.000374489	serine carboxypeptidase-like 44 (scpl44)
AT1G43800	1.2828	1.36937e-05	0.000572897	Plant stearoyl-acyl-carrier-protein desaturase family protein
AT1G44000	1.06526	0.000426402	0.00964379	unknown protein
AT1G44446	1.47351	8.67611e-07	5.3631e-05	CHLORINA 1 (CH1)
AT1G44542	-2.92815	0.00180356	0.0298864	Cyclase family protein
AT1G45130	-1.09907	0.000234217	0.0060809	beta-galactosidase 5 (BGAL5)
AT1G45201	3.02969	5.04672e-22	3.70194e-19	triacylglycerol lipase-like 1 (TLL1)
AT1G45231	1.70428	0.000342738	0.00826099	S-adenosyl-L-methionine-dependent methyltransferases superfamily protein
AT1G47630	-1.71866	0.000401884	0.00924124	pseudogene, cytochrome P450 family, similar to Cytochrome P450 86A2 (SP:O23066) (Arabidopsis thaliana)
AT1G48130	-2.06037	4.44099e-11	7.03082e-09	1-cysteine peroxiredoxin 1 (PER1)
AT1G48820	-1.63643	0.000584609	0.0124419	Terpenoid cyclases/Protein prenyltransferases superfamily protein
AT1G49130	-1.26913	6.96916e-05	0.00225866	B-box type zinc finger protein with CCT domain
AT1G49450	1.16829	0.000768503	0.0154445	Transducin/WD40 repeat-like superfamily protein
AT1G49570	-2.31196	1.59709e-13	3.62325e-11	Peroxidase superfamily protein
AT1G50060	1.03412	0.000496641	0.0108964	CAP (Cysteine-rich secretory proteins, Antigen 5, and Pathogenesis-related 1 protein) superfamily protein
AT1G50280	2.44735	0.000832753	0.0164798	Phototropic-responsive NPH3 family protein
AT1G50732	1.30251	0.000248548	0.00636735	unknown protein.
AT1G51260	1.87984	0.000230408	0.00602182	lysophosphatidyl acyltransferase 3 (LPAT3)
AT1G51380	1.1332	0.00250661	0.0383058	DEA(D/H)-box RNA helicase family protein
AT1G51400	1.24397	2.72372e-05	0.00103342	Photosystem II 5 kD protein
AT1G51530	-27.2437	0.000273446	0.0068536	RNA-binding (RRM/RBD/RNP motifs) family protein
AT1G51805	2.38331	9.12917e-13	1.80988e-10	Leucine-rich repeat protein kinase family protein
AT1G52050	1.22347	4.95663e-05	0.00169635	Mannose-binding lectin superfamily protein
AT1G52070	1.69038	4.51285e-08	3.79045e-06	Mannose-binding lectin superfamily protein
AT1G52110	-26.7981	0.00161056	0.0272631	Mannose-binding lectin superfamily protein
AT1G52230	1.78235	2.46368e-09	2.72441e-07	photosystem I subunit H2 (PSAH2)
AT1G52270	1.01987	0.00078592	0.0157084	unknown protein
AT1G52343	-1.34595	0.000122811	0.00363738	unknown protein
AT1G52400	2.37044	1.07433e-05	0.000465389	beta glucosidase 18 (BGLU18)
AT1G52410	1.8678	4.1561e-07	2.7987e-05	TSK-associating protein 1 (TSA1)
AT1G52415	-3.97015	0.00180356	0.0298864	Bifunctional inhibitor/lipid-transfer protein/seed storage 2S albumin superfamily protein
AT1G52570	-3.28698	2.26348e-05	0.000884728	phospholipase D alpha 2 (PLDALPHA2)
AT1G52830	-1.01223	0.00240877	0.0370681	indole-3-acetic acid 6 (IAA6)
AT1G53070	1.38803	3.54125e-06	0.00018123	Legume lectin family protein
AT1G53080	-3.8496	2.33421e-22	1.83452e-19	Legume lectin family protein
AT1G53390	1.01641	0.00130117	0.0229988	P-loop containing nucleoside triphosphate hydrolases superfamily protein
AT1G53470	-1.32982	0.000666094	0.0138284	mechanosensitive channel of small conductance-like 4 (MSL4)
AT1G53635	1.48996	0.00100875	0.0190827	unknown protein
AT1G53680	1.17619	0.00123315	0.0220983	glutathione S-transferase TAU 28 (GSTU28)
AT1G53700	-2.08413	1.4127e-08	1.32846e-06	WAG 1 (WAG1)
AT1G53708	1.17425	0.00188725	0.0307635	ROTUNDIFOLIA like 9 (RTFL9)
AT1G54020	2.69524	6.67103e-13	1.35928e-10	GDSL-like Lipase/Acylhydrolase superfamily protein
AT1G54040	2.94782	1.01873e-06	6.19284e-05	epithiospecifier protein (ESP)
AT1G54820	1.2942	3.19212e-05	0.0011806	Protein kinase superfamily protein
AT1G55200	1.69295	2.00227e-06	0.000109607	Protein kinase protein with adenine nucleotide alpha hydrolases-like domain
AT1G55670	1.4341	1.2269e-06	7.25785e-05	photosystem I subunit G (PSAG)
AT1G55910	1.04	0.00193281	0.0312975	zinc transporter 11 precursor (ZIP11)
AT1G56220	-1.31542	8.16004e-06	0.000371012	Dormancy/auxin associated family protein
AT1G56250	-2.06143	0.00257961	0.0391897	phloem protein 2-B14 (PP2-B14)
AT1G56300	-1.20765	5.24027e-05	0.00176867	Chaperone DnaJ-domain superfamily protein
AT1G56320	1.28407	0.000752721	0.0152246	BEST Arabidopsis thaliana protein match is: Glycine-rich protein family (TAIR:AT5G49350.2)
AT1G56430	1.81411	1.56443e-08	1.44651e-06	nicotianamine synthase 4 (NAS4)
AT1G56540	-26.7914	0.00295179	0.0430465	Disease resistance protein (TIR-NBS-LRR class) family
AT1G56650	3.86811	1.86453e-11	3.15621e-09	production of anthocyanin pigment 1 (PAP1)
AT1G56660	-1.23634	4.03293e-05	0.00144341	unknown protein
AT1G56680	1.23756	7.02957e-05	0.00227155	Chitinase family protein
AT1G57590	1.50344	0.00022641	0.00593848	Pectinacetylesterase family protein
AT1G57750	2.60302	1.58396e-05	0.000652689	cytochrome P450, family 96, subfamily A, polypeptide 15 (CYP96A15)
AT1G57980	1.40255	4.00687e-05	0.00144077	Nucleotide-sugar transporter family protein
AT1G58180	-1.15331	0.000142694	0.00409937	beta carbonic anhydrase 6 (BCA6)
AT1G58290	1.1678	7.32709e-05	0.00235942	HEMA1
AT1G58340	1.42088	9.97998e-06	0.000437489	ZF14
AT1G58410	-1.291	3.12433e-05	0.00115748	Disease resistance protein (CC-NBS-LRR class) family
AT1G59730	1.15103	0.00023832	0.00614828	thioredoxin H-type 7 (TH7)
AT1G60000	1.1066	0.00028725	0.0071025	RNA-binding (RRM/RBD/RNP motifs) family protein
AT1G60060	-1.60058	1.58258e-07	1.16087e-05	Serine/threonine-protein kinase WNK (With No Lysine)-related
AT1G60590	1.71707	1.05805e-07	8.08455e-06	Pectin lyase-like superfamily protein
AT1G60950	1.34315	5.30155e-06	0.000256973	FED A
AT1G61050	1.71318	1.66522e-05	0.000681131	alpha 1,4-glycosyltransferase family protein
AT1G61190	1.22777	0.000848846	0.0166634	LRR and NB-ARC domains-containing disease resistance protein
AT1G61520	1.69064	1.3881e-08	1.31101e-06	photosystem I light harvesting complex gene 3 (LHCA3)
AT1G61740	-1.05008	0.000394559	0.0091783	Sulfite exporter TauE/SafE family protein
AT1G62280	-1.34788	0.000800801	0.0159335	SLAC1 homologue 1 (SLAH1)
AT1G62380	-1.12358	0.000129332	0.00376965	ACC oxidase 2 (ACO2)
AT1G62410	-26.7834	0.00295179	0.0430465	MIF4G domain-containing protein
AT1G62420	-2.31311	3.14652e-06	0.000163693	Protein of unknown function (DUF506)
AT1G62480	-1.24411	2.35844e-05	0.000913731	Vacuolar calcium-binding protein-related
AT1G62610	-1.1266	0.000576954	0.0123147	NAD(P)-binding Rossmann-fold superfamily protein
AT1G62710	-1.0091	0.000650499	0.0135871	beta vacuolar processing enzyme (BETA-VPE)
AT1G63040	-1.26579	0.0010772	0.0199815	pseudogene, DRE binding protein, similar to GI:3738224 from (Arabidopsis thaliana) (Plant Cell 10 (8), 1391-1406 (1998))
AT1G63070	-3.18571	0.00152688	0.0262229	pentatricopeptide (PPR) repeat-containing protein
AT1G63360	1.89437	0.00271964	0.0407132	Disease resistance protein (CC-NBS-LRR class) family
AT1G63880	1.54902	1.36369e-06	7.96006e-05	Disease resistance protein (TIR-NBS-LRR class) family
AT1G64110	-2.43267	2.38905e-15	7.20183e-13	P-loop containing nucleoside triphosphate hydrolases superfamily protein
AT1G64450	1.05108	0.00250031	0.0382361	Glycine-rich protein family
AT1G64640	-1.03003	0.000446057	0.00998569	early nodulin-like protein 8 (ENODL8)
AT1G64660	-2.41226	6.6428e-15	1.87412e-12	methionine gamma-lyase (MGL)
AT1G64780	1.79021	1.07489e-06	6.51625e-05	ammonium transporter 1
AT1G64910	2.7216	5.84335e-06	0.000281376	UDP-Glycosyltransferase superfamily protein
AT1G65030	1.02606	0.000976008	0.0185475	Transducin/WD40 repeat-like superfamily protein
AT1G65060	1.69507	1.00971e-07	7.82382e-06	4-coumarate:CoA ligase 3 (4CL3)
AT1G65090	-1.28418	1.44399e-05	0.000600907	unknown protein
AT1G65710	1.04783	0.000774543	0.0155375	unknown protein
AT1G65875	-28.0261	1.13769e-06	6.80327e-05	pseudogene, similar to EST AU070346(S12172) corresponds to a region of the predicted gene.~similar to AMP-binding protein. (X94625), blastp match of 57% identity and 4.5e-137 P-value to GP|6063549|dbj|BAA85409.1||AP000615 EST AU070346(S12172) corresponds to a region of the predicted gene.~similar to AMP-binding protein. (X94625) {Oryza sativa (japonica cultivar-group)}
AT1G65900	1.20712	0.00104679	0.0196047	unknown protein
AT1G65970	-1.02553	0.000529746	0.0114966	thioredoxin-dependent peroxidase 2 (TPX2)
AT1G66050	1.26362	0.000168819	0.00471451	VARIANT IN METHYLATION 2 (VIM2)
AT1G66360	2.21954	0.00281586	0.0417816	Calcium-dependent lipid-binding (CaLB domain) family protein
AT1G66780	-2.5269	0.00101024	0.0190827	MATE efflux family protein
AT1G66970	3.27733	2.7623e-18	1.24055e-15	SHV3-like 2 (SVL2)
AT1G67035	1.22524	0.000123669	0.00364807	unknown protein
AT1G67100	-1.07019	0.000435218	0.00980287	LOB domain-containing protein 40 (LBD40)
AT1G67110	1.18296	0.00146155	0.025345	cytochrome P450, family 735, subfamily A, polypeptide 2 (CYP735A2)
AT1G67265	-3.05517	1.59736e-21	1.00433e-18	ROTUNDIFOLIA like 21 (RTFL21)
AT1G67270	-4.18624	6.48005e-08	5.24265e-06	Zinc-finger domain of monoamine-oxidase A repressor R1 protein
AT1G67310	-1.11389	0.00243699	0.0373977	Calmodulin-binding transcription activator protein with CG-1 and Ankyrin domains
AT1G67470	1.12187	0.00201295	0.0321692	Protein kinase superfamily protein
AT1G67980	-2.90543	4.88317e-07	3.21734e-05	caffeoyl-CoA 3-O-methyltransferase (CCOAMT)
AT1G68390	1.5611	0.00300593	0.0436912	Core-2/I-branching beta-1,6-N-acetylglucosaminyltransferase family protein
AT1G68520	1.32296	8.42078e-06	0.000380508	B-box type zinc finger protein with CCT domain
AT1G68620	-2.36469	3.54172e-09	3.74707e-07	alpha/beta-Hydrolases superfamily protein
AT1G68740	1.63001	0.000173884	0.00481319	PHO1
AT1G68800	-2.59124	3.35998e-07	2.31343e-05	TCP domain protein 12 (TCP12)
AT1G69160	1.34147	6.1775e-06	0.00029617	unknown protein
AT1G69490	-3.17468	1.49241e-14	4.05457e-12	NAC-like, activated by AP3/PI (NAP)
AT1G69570	-1.20932	5.05824e-05	0.00172043	Dof-type zinc finger DNA-binding family protein
AT1G69690	-1.28289	2.0842e-05	0.000825316	TCP family transcription factor
AT1G69930	-1.96695	0.00196662	0.0316125	glutathione S-transferase TAU 11 (GSTU11)
AT1G70420	-1.09097	0.000344614	0.00827901	Protein of unknown function (DUF1645)
AT1G70440	1.34249	4.95416e-05	0.00169635	similar to RCD one 3 (SRO3)
AT1G70710	-1.49034	6.59553e-07	4.207e-05	glycosyl hydrolase 9B1 (GH9B1)
AT1G70820	3.48808	4.57553e-06	0.00022576	phosphoglucomutase, putative / glucose phosphomutase, putative
AT1G70890	1.00809	0.000766372	0.0154157	MLP-like protein 43 (MLP43)
AT1G71030	-2.27192	3.01389e-11	4.98675e-09	MYB-like 2 (MYBL2)
AT1G71250	-2.42572	0.00216478	0.03391	GDSL-like Lipase/Acylhydrolase superfamily protein
AT1G71692	1.29227	2.18126e-05	0.000858692	AGAMOUS-like 12 (AGL12)
AT1G71850	1.26274	0.000272088	0.00684293	Ubiquitin carboxyl-terminal hydrolase family protein
AT1G71890	1.35452	1.00896e-05	0.000440541	SUC5
AT1G72100	-1.13786	0.00017663	0.00486474	late embryogenesis abundant domain-containing protein / LEA domain-containing protein
AT1G72290	-30.7853	3.65946e-24	3.50131e-21	Kunitz family trypsin and protease inhibitor protein
AT1G72490	-3.44628	1.8463e-17	7.00513e-15	unknown protein
AT1G72520	-2.17907	1.51431e-08	1.40607e-06	PLAT/LH2 domain-containing lipoxygenase family protein
AT1G72610	1.99227	3.6198e-11	5.90055e-09	germin-like protein 1 (GER1)
AT1G72670	1.08634	0.000582564	0.0124104	IQ-domain 8 (iqd8)
AT1G73000	-2.61865	0.00152688	0.0262229	PYR1-like 3 (PYL3)
AT1G73190	-1.50129	9.77945e-07	5.99461e-05	TIP3
AT1G73260	-1.05655	0.000317216	0.00778223	kunitz trypsin inhibitor 1 (KTI1)
AT1G73330	1.25323	2.73114e-05	0.00103413	drought-repressed 4 (DR4)
AT1G73550	2.04098	3.80511e-05	0.00137722	Bifunctional inhibitor/lipid-transfer protein/seed storage 2S albumin superfamily protein
AT1G73620	1.64285	4.51223e-07	3.02732e-05	Pathogenesis-related thaumatin superfamily protein
AT1G73630	1.50633	1.16254e-05	0.000496753	EF hand calcium-binding protein family
AT1G73870	29.9586	1.12705e-17	4.59295e-15	B-box type zinc finger protein with CCT domain
AT1G74070	1.17549	8.75755e-05	0.00276101	Cyclophilin-like peptidyl-prolyl cis-trans isomerase family protein
AT1G74490	-1.34879	6.7788e-06	0.000318748	Protein kinase superfamily protein
AT1G74650	-1.77201	1.31578e-05	0.000552578	myb domain protein 31 (MYB31)
AT1G74670	1.88422	4.62349e-10	5.94998e-08	Gibberellin-regulated family protein
AT1G74730	1.37937	3.11283e-06	0.000162527	Protein of unknown function (DUF1118)
AT1G74870	1.60771	0.00117197	0.0212441	RING/U-box superfamily protein
AT1G75450	-1.39214	1.38034e-05	0.00057639	cytokinin oxidase 5 (CKX5)
AT1G75580	1.37123	1.30282e-05	0.000549232	SAUR-like auxin-responsive protein family
AT1G75780	-1.08903	0.000207671	0.00553941	tubulin beta-1 chain (TUB1)
AT1G75900	-1.79473	2.64517e-09	2.88166e-07	GDSL-like Lipase/Acylhydrolase superfamily protein
AT1G76080	2.09186	2.19509e-11	3.65948e-09	chloroplastic drought-induced stress protein of 32 kD (CDSP32)
AT1G76100	1.96468	6.94074e-11	1.06068e-08	plastocyanin 1 (PETE1)
AT1G76120	1.1983	0.000928929	0.0179947	Pseudouridine synthase family protein
AT1G76410	-1.06199	0.0011124	0.0204166	ATL8
AT1G76610	2.59997	1.58396e-05	0.000652689	Protein of unknown function, DUF617
AT1G76878	-1.02792	0.00103418	0.0194183	other RNA
AT1G77000	-1.31925	0.00215965	0.0338982	SKP2B
AT1G77200	-1.23628	6.88767e-05	0.00224216	Integrase-type DNA-binding superfamily protein
AT1G77330	-1.63598	3.93804e-08	3.42531e-06	2-oxoglutarate (2OG) and Fe(II)-dependent oxygenase superfamily protein
AT1G77520	-3.90648	0.000685382	0.0141077	O-methyltransferase family protein
AT1G77740	-1.14692	0.000134384	0.00390139	phosphatidylinositol-4-phosphate 5-kinase 2 (PIP5K2)
AT1G77765	1.53363	3.58532e-05	0.00130843	unknown protein
AT1G77950	-3.33626	1.08019e-19	5.52807e-17	AGAMOUS-like 67 (AGL67)
AT1G78120	1.25877	0.00196412	0.0316125	Tetratricopeptide repeat (TPR)-like superfamily protein
AT1G78230	-1.58001	1.82825e-06	0.000102373	Outer arm dynein light chain 1 protein
AT1G78320	2.11331	1.19246e-07	9.08003e-06	glutathione S-transferase TAU 23 (GSTU23)
AT1G78460	2.08501	1.0618e-10	1.57878e-08	SOUL heme-binding family protein
AT1G78480	1.24163	0.000846998	0.0166569	Prenyltransferase family protein
AT1G78490	1.67387	1.66882e-07	1.22007e-05	cytochrome P450, family 708, subfamily A, polypeptide 3 (CYP708A3)
AT1G78700	-1.18909	9.05292e-05	0.00282579	BES1/BZR1 homolog 4 (BEH4)
AT1G78820	1.20329	0.000178137	0.00489398	D-mannose binding lectin protein with Apple-like carbohydrate-binding domain
AT1G78970	-1.32569	5.14806e-05	0.0017429	lupeol synthase 1 (LUP1)
AT1G78995	1.39195	7.23027e-06	0.000336383	unknown protein
AT1G79700	-1.13384	0.000179052	0.00491299	Integrase-type DNA-binding superfamily protein
AT1G79760	1.5445	0.000973338	0.0185128	downstream target of AGL15-4 (DTA4)
AT1G80090	-1.51592	1.45127e-06	8.38233e-05	Cystathionine beta-synthase (CBS) family protein
AT1G80120	1.29127	2.48734e-05	0.000958605	Protein of unknown function (DUF567)
AT1G80160	-1.14971	0.000205365	0.00549121	Lactoylglutathione lyase / glyoxalase I family protein
AT1G80180	-1.03681	0.000414746	0.00947757	unknown protein
AT1G80740	1.47107	0.000518793	0.0112812	chromomethylase 1 (CMT1)
AT1G80920	-1.30382	1.10638e-05	0.000478073	J8
AT2G01610	-2.02206	3.88708e-08	3.39441e-06	Plant invertase/pectin methylesterase inhibitor superfamily protein
AT2G01760	1.31633	0.000280389	0.00695631	response regulator 14 (RR14)
AT2G01890	2.35585	1.61995e-14	4.34739e-12	purple acid phosphatase 8 (PAP8)
AT2G01913	1.09096	0.00122635	0.0220123	unknown protein
AT2G02000	1.73632	0.000115269	0.00345492	glutamate decarboxylase 3 (GAD3)
AT2G02630	-1.12052	0.000862515	0.0168566	Cysteine/Histidine-rich C1 domain family protein
AT2G02820	-1.00312	0.000951749	0.0182441	myb domain protein 88 (MYB88)
AT2G03090	1.00421	0.000732459	0.0148695	expansin A15 (EXPA15)
AT2G03750	1.38628	4.47526e-06	0.000222308	P-loop containing nucleoside triphosphate hydrolases superfamily protein
AT2G04090	3.1433	0.00290195	0.0426303	MATE efflux family protein
AT2G04690	-1.18417	6.1081e-05	0.00201521	Pyridoxamine 5'-phosphate oxidase family protein
AT2G05070	3.3463	6.00755e-26	8.26264e-23	photosystem II light harvesting complex gene 2.2 (LHCB2.2)
AT2G05100	3.11322	4.21147e-23	3.7071e-20	photosystem II light harvesting complex gene 2.1 (LHCB2.1)
AT2G05370	-3.93453	3.96783e-06	0.000199808	BEST Arabidopsis thaliana protein match is: RNA-dependent RNA polymerase 6 (TAIR:AT3G49500.1)
AT2G05540	-2.33314	1.85684e-14	4.80726e-12	Glycine-rich protein family
AT2G05914	1.47777	1.62738e-05	0.000668137	Potential natural antisense gene, locus overlaps with AT2G05915
AT2G06520	1.32385	7.11426e-06	0.000331687	photosystem II subunit X (PSBX)
AT2G06925	1.06857	0.000372881	0.00876669	PLA2-ALPHA
AT2G07711	1.19154	0.000608587	0.0128899	pseudogene, similar to NADH dehydrogenase subunit 5, blastp match of 97% identity and 2.2e-244 P-value to GP|1066145|dbj|BAA07176.1||D37958 NADH dehydrogenase subunit 5 {Malus x domestica}
AT2G07715	1.41298	0.00291587	0.0427778	Nucleic acid-binding, OB-fold-like protein
AT2G13610	1.21285	0.00022232	0.00585713	ABC-2 type transporter family protein
AT2G14610	1.23015	0.000232099	0.00605879	pathogenesis-related gene 1 (PR1)
AT2G14900	-1.37127	4.45411e-06	0.000221758	Gibberellin-regulated family protein
AT2G15010	-1.95835	1.27527e-09	1.50072e-07	Plant thionin
AT2G15620	1.13216	0.00011521	0.00345492	nitrite reductase 1 (NIR1)
AT2G16005	1.77633	5.25322e-06	0.000255193	MD-2-related lipid recognition domain-containing protein
AT2G16060	1.10325	0.000175786	0.00485364	hemoglobin 1 (HB1)
AT2G16230	1.04709	0.00200619	0.0320845	O-Glycosyl hydrolases family 17 protein
AT2G16660	1.26607	0.00035625	0.00846613	Major facilitator superfamily protein
AT2G16760	1.17462	0.000234747	0.0060809	Calcium-dependent phosphotriesterase superfamily protein
AT2G16850	1.25812	2.03156e-05	0.000808434	plasma membrane intrinsic protein 2
AT2G17680	-4.19725	8.83399e-05	0.00277715	Arabidopsis protein of unknown function (DUF241)
AT2G17740	-5.02102	4.63501e-08	3.86356e-06	Cysteine/Histidine-rich C1 domain family protein
AT2G17850	1.74612	1.45021e-07	1.07452e-05	Rhodanese/Cell cycle control phosphatase superfamily protein
AT2G18050	-3.33747	4.52466e-25	5.16728e-22	histone H1-3 (HIS1-3)
AT2G18150	1.23908	0.00236155	0.0364682	Peroxidase superfamily protein
AT2G18193	1.03833	0.00151756	0.026131	P-loop containing nucleoside triphosphate hydrolases superfamily protein
AT2G18280	-1.18949	5.31375e-05	0.00178899	tubby like protein 2 (TLP2)
AT2G18540	-2.11254	8.8969e-11	1.34099e-08	RmlC-like cupins superfamily protein
AT2G18700	-1.05935	0.000353043	0.00840808	trehalose phosphatase/synthase 11 (TPS11)
AT2G18800	1.3538	9.71824e-05	0.00299523	xyloglucan endotransglucosylase/hydrolase 21 (XTH21)
AT2G18969	-2.04159	3.09919e-11	5.08961e-09	BEST Arabidopsis thaliana protein match is: sequence-specific DNA binding transcription factors
AT2G19400	1.67567	0.000363478	0.0085915	AGC (cAMP-dependent, cGMP-dependent and protein kinase C) kinase family protein
AT2G19660	-1.51801	5.34393e-07	3.47925e-05	Cysteine/Histidine-rich C1 domain family protein
AT2G19670	1.55522	1.21056e-06	7.1805e-05	protein arginine methyltransferase 1A (PRMT1A)
AT2G19810	-1.23268	3.84541e-05	0.00138953	CCCH-type zinc finger family protein
AT2G19900	-1.86761	1.31392e-07	9.90211e-06	NADP-malic enzyme 1 (NADP-ME1)
AT2G19960	-1.81241	0.000678288	0.0140286	hAT family dimerisation domain
AT2G19970	-1.16871	0.000400329	0.00924124	CAP (Cysteine-rich secretory proteins, Antigen 5, and Pathogenesis-related 1 protein) superfamily protein
AT2G20080	-1.1903	7.50372e-05	0.00240359	unknown protein
AT2G20180	-6.66768	4.13535e-45	1.51671e-41	phytochrome interacting factor 3-like 5 (PIL5)
AT2G20260	1.13321	0.000116662	0.00348341	photosystem I subunit E-2 (PSAE-2)
AT2G20880	-2.17964	3.58171e-06	0.000182389	Integrase-type DNA-binding superfamily protein
AT2G21140	-1.44272	1.08109e-06	6.53584e-05	proline-rich protein 2 (PRP2)
AT2G21330	1.0621	0.000312553	0.00767638	fructose-bisphosphate aldolase 1 (FBA1)
AT2G21350	2.3993	0.000193547	0.00525827	RNA-binding CRS1 / YhbY (CRM) domain protein
AT2G21450	3.18062	0.00290195	0.0426303	chromatin remodeling 34 (CHR34)
AT2G21490	-1.44748	1.13619e-06	6.80327e-05	dehydrin LEA (LEA)
AT2G21540	-1.13044	0.000140466	0.00404767	SEC14-like 3 (SFH3)
AT2G21910	-6.59594	3.04317e-25	3.72044e-22	cytochrome P450, family 96, subfamily A, polypeptide 5 (CYP96A5)
AT2G22080	-1.1178	0.000165533	0.0046582	unknown protein
AT2G22510	2.04529	4.91758e-05	0.00168824	hydroxyproline-rich glycoprotein family protein
AT2G22730	-1.57941	0.00104053	0.0195042	Major facilitator superfamily protein
AT2G22810	3.72388	5.23904e-07	3.42108e-05	1-aminocyclopropane-1-carboxylate synthase 4 (ACS4)
AT2G22860	-1.38996	3.10082e-06	0.000162468	phytosulfokine 2 precursor (PSK2)
AT2G23110	-1.04753	0.000416947	0.00949828	Late embryogenesis abundant protein, group 6
AT2G23130	1.67679	2.24421e-06	0.000121641	arabinogalactan protein 17 (AGP17)
AT2G23180	1.88115	7.93311e-07	4.9455e-05	cytochrome P450, family 96, subfamily A, polypeptide 1 (CYP96A1)
AT2G23410	1.20001	0.000176488	0.00486474	cis-prenyltransferase (CPT)
AT2G23540	1.90983	3.48626e-06	0.000178831	GDSL-like Lipase/Acylhydrolase superfamily protein
AT2G23630	1.31764	0.000150412	0.00428198	SKU5 similar 16 (sks16)
AT2G23640	-1.19059	0.000413733	0.00946424	Reticulan like protein B13 (RTNLB13)
AT2G23670	1.70453	1.12808e-08	1.10332e-06	homolog of Synechocystis YCF37 (YCF37)
AT2G24255	27.1982	0.000490287	0.0107677	unknown protein
AT2G24300	-1.20373	5.31672e-05	0.00178899	Calmodulin-binding protein
AT2G24645	1.13404	0.000206171	0.00550606	Transcriptional factor B3 family protein
AT2G24762	1.14851	0.000232737	0.00606109	glutamine dumper 4 (GDU4)
AT2G25060	1.07515	0.000286321	0.00709024	early nodulin-like protein 14 (ENODL14)
AT2G25130	-2.49218	2.64412e-09	2.88166e-07	ARM repeat superfamily protein
AT2G25150	1.7844	1.30172e-05	0.000549232	HXXXD-type acyl-transferase family protein
AT2G25270	1.07052	0.000528919	0.01149	unknown protein
AT2G25770	-1.28437	0.00167212	0.0281751	Polyketide cyclase/dehydrase and lipid transport superfamily protein
AT2G25880	1.34965	2.83297e-05	0.00106386	ataurora2 (AUR2)
AT2G25890	-1.66644	4.00584e-07	2.71509e-05	Oleosin family protein
AT2G26040	1.23206	0.000279873	0.00695133	PYR1-like 2 (PYL2)
AT2G26440	-1.02539	0.00137974	0.0241163	Plant invertase/pectin methylesterase inhibitor superfamily
AT2G26695	-1.20677	0.000219913	0.00580962	Ran BP2/NZF zinc finger-like superfamily protein
AT2G27300	-1.66487	2.55572e-05	0.000981521	NTM1-like 8 (NTL8)
AT2G27402	1.68377	8.10444e-08	6.41534e-06	BEST Arabidopsis thaliana protein match is: plastid transcriptionally active 18 (TAIR:AT2G32180.1)
AT2G27550	1.11312	0.000165233	0.00465573	centroradialis (ATC)
AT2G27775	1.0274	0.000688537	0.0141192	FUNCTIONS IN: molecular_function unknown
AT2G27830	-1.57475	1.53323e-07	1.12844e-05	unknown protein
AT2G27840	1.19053	5.36568e-05	0.00179996	HDT4
AT2G27940	-1.99124	1.86006e-06	0.000103627	RING/U-box superfamily protein
AT2G28085	-3.16138	7.66273e-06	0.000352774	SAUR-like auxin-responsive protein family
AT2G28140	1.08912	0.000576833	0.0123147	Protein of unknown function (DUF1635)
AT2G28400	-1.16455	8.79172e-05	0.00276782	Protein of unknown function, DUF584
AT2G28420	-1.0411	0.000418572	0.00952545	Lactoylglutathione lyase / glyoxalase I family protein
AT2G28440	1.81039	0.000320969	0.00785677	proline-rich family protein
AT2G28490	-2.41897	9.50281e-15	2.64707e-12	RmlC-like cupins superfamily protein
AT2G28630	-1.93914	1.62245e-10	2.23147e-08	3-ketoacyl-CoA synthase 12 (KCS12)
AT2G29260	1.68703	0.000188253	0.00512709	NAD(P)-binding Rossmann-fold superfamily protein
AT2G29320	3.3447	0.00112248	0.0204989	NAD(P)-binding Rossmann-fold superfamily protein
AT2G29360	2.04177	1.35211e-08	1.28252e-06	NAD(P)-binding Rossmann-fold superfamily protein
AT2G29380	-1.52752	0.000756088	0.0152573	highly ABA-induced PP2C gene 3 (HAI3)
AT2G29440	-1.90941	5.91645e-10	7.43985e-08	glutathione S-transferase tau 6 (GSTU6)
AT2G29460	-1.23464	0.00076485	0.0153992	glutathione S-transferase tau 4 (GSTU4)
AT2G29480	-1.08266	0.000566542	0.0121395	glutathione S-transferase tau 2 (GSTU2)
AT2G30520	1.98396	5.31406e-11	8.29369e-09	ROOT PHOTOTROPISM 2 (RPT2)
AT2G30540	1.36734	0.000200709	0.00541275	Thioredoxin superfamily protein
AT2G30570	1.41305	1.74625e-06	9.82813e-05	photosystem II reaction center W (PSBW)
AT2G31070	1.04317	0.000459067	0.0102499	TCP domain protein 10 (TCP10)
AT2G31085	-1.14419	0.000339095	0.00819114	CLAVATA3/ESR-RELATED 6 (CLE6)
AT2G31380	3.09714	3.17979e-10	4.21533e-08	salt tolerance homologue (STH)
AT2G31790	1.08834	0.00187487	0.0306451	UDP-Glycosyltransferase superfamily protein
AT2G31980	-3.31023	2.95005e-25	3.72044e-22	PHYTOCYSTATIN 2 (CYS2)
AT2G32100	1.1904	0.00022944	0.00600364	ovate family protein 16 (OFP16)
AT2G32140	-3.48986	1.17305e-06	6.99571e-05	transmembrane receptors
AT2G32150	-1.69597	1.50361e-08	1.40205e-06	Haloacid dehalogenase-like hydrolase (HAD) superfamily protein
AT2G32220	1.01742	0.00077281	0.0155168	Ribosomal L27e protein family
AT2G32430	-1.53504	3.41293e-07	2.33972e-05	Galactosyltransferase family protein
AT2G32550	4.39358	8.81292e-10	1.06559e-07	Cell differentiation, Rcd1-like protein
AT2G32610	-1.65776	1.60381e-06	9.19101e-05	cellulose synthase-like B1 (CSLB01)
AT2G32880	1.36049	0.000501957	0.0110021	TRAF-like family protein
AT2G32990	-1.3731	6.40494e-06	0.000305742	glycosyl hydrolase 9B8 (GH9B8)
AT2G33070	-1.13984	0.000212893	0.00565129	nitrile specifier protein 2 (NSP2)
AT2G33380	-3.70833	1.08214e-22	8.81984e-20	RESPONSIVE TO DESSICATION 20 (RD20)
AT2G33400	2.08128	6.45223e-06	0.000306685	unknown protein
AT2G33790	1.48375	6.06848e-07	3.90476e-05	arabinogalactan protein 30 (AGP30)
AT2G33830	-1.40971	1.85774e-06	0.000103627	Dormancy/auxin associated family protein
AT2G33847	1.37616	0.000100976	0.00308194	unknown protein
AT2G33880	-1.0519	0.00154189	0.0264258	homeobox-3 (HB-3)
AT2G34020	-1.06712	0.000326657	0.00796059	Calcium-binding EF-hand family protein
AT2G34070	-1.0616	0.000355322	0.00845321	TRICHOME BIREFRINGENCE-LIKE 37 (TBL37)
AT2G34315	-1.98512	1.19219e-08	1.16086e-06	Avirulence induced gene (AIG1) family protein
AT2G34420	2.69363	2.63792e-18	1.20938e-15	photosystem II light harvesting complex gene B1B2 (LHB1B2)
AT2G34430	8.26978	4.91907e-94	1.08249e-89	light-harvesting chlorophyll-protein complex II subunit B1 (LHB1B1)
AT2G34490	4.34837	1.91838e-20	1.08246e-17	cytochrome P450, family 710, subfamily A, polypeptide 2 (CYP710A2)
AT2G34510	1.19881	5.82227e-05	0.00192669	FUNCTIONS IN: molecular_function unknown
AT2G34540	1.81014	0.00111377	0.0204248	unknown protein
AT2G34610	-2.16039	0.00020165	0.00542483	unknown protein
AT2G34620	2.0184	1.59421e-10	2.22039e-08	Mitochondrial transcription termination factor family protein
AT2G34810	1.26512	2.85189e-05	0.00106551	FAD-binding Berberine family protein
AT2G35170	-1.34449	0.000214599	0.00568288	Histone H3 K4-specific methyltransferase SET7/9 family protein
AT2G35210	-1.15831	0.000384678	0.0089769	root and pollen arfgap (RPA)
AT2G35260	1.11232	0.000194076	0.00526253	unknown protein
AT2G35760	-1.36687	7.82468e-06	0.000358729	Uncharacterised protein family (UPF0497)
AT2G35960	1.76463	9.40415e-08	7.39099e-06	NDR1/HIN1-like 12 (NHL12)
AT2G35980	1.02412	0.00175688	0.0293115	YELLOW-LEAF-SPECIFIC GENE 9 (YLS9)
AT2G36270	-1.23926	5.21902e-05	0.00176421	ABA INSENSITIVE 5 (ABI5)
AT2G36590	27.8935	9.47066e-06	0.000417658	proline transporter 3 (ProT3)
AT2G36640	-1.14683	0.000105822	0.0032032	embryonic cell protein 63 (ECP63)
AT2G37280	-1.29295	0.00211506	0.0334228	pleiotropic drug resistance 5 (PDR5)
AT2G37390	1.04888	0.00108072	0.020002	Chloroplast-targeted copper chaperone protein
AT2G37440	1.47069	2.34135e-05	0.00090871	DNAse I-like superfamily protein
AT2G37678	-1.14256	0.000111135	0.00334104	far-red elongated hypocotyl 1 (FHY1)
AT2G37720	28.0413	1.91595e-06	0.000105935	TRICHOME BIREFRINGENCE-LIKE 15 (TBL15)
AT2G37930	-1.42877	3.0293e-06	0.000159099	Protein of unknown function (DUF3527)
AT2G38340	1.29121	0.000666094	0.0138284	Integrase-type DNA-binding superfamily protein
AT2G38380	1.35047	1.21595e-05	0.000518569	Peroxidase superfamily protein
AT2G38400	-1.90017	3.46868e-10	4.57076e-08	alanine:glyoxylate aminotransferase 3 (AGT3)
AT2G38500	-1.22761	0.000153665	0.00435766	2-oxoglutarate (2OG) and Fe(II)-dependent oxygenase superfamily protein
AT2G38530	-1.4701	6.74699e-07	4.28995e-05	lipid transfer protein 2 (LTP2)
AT2G38540	1.82104	1.17563e-09	1.39484e-07	lipid transfer protein 1 (LP1)
AT2G38620	1.12086	0.00111922	0.0204735	cyclin-dependent kinase B1
AT2G39040	1.20686	0.000140526	0.00404767	Peroxidase superfamily protein
AT2G39220	1.21537	9.8662e-05	0.00303234	PATATIN-like protein 6 (PLP6)
AT2G39250	1.55784	2.08566e-06	0.000113606	SCHNARCHZAPFEN (SNZ)
AT2G39350	-1.683	6.53566e-08	5.26019e-06	ABC-2 type transporter family protein
AT2G39380	-1.48846	6.31835e-05	0.00208146	exocyst subunit exo70 family protein H2 (EXO70H2)
AT2G39400	-1.29433	0.000169126	0.0047171	alpha/beta-Hydrolases superfamily protein
AT2G39510	3.6643	1.11522e-11	1.9324e-09	nodulin MtN21 /EamA-like transporter family protein
AT2G39560	1.39986	5.48488e-05	0.00183157	Putative membrane lipoprotein
AT2G39730	1.14454	9.717e-05	0.00299523	rubisco activase (RCA)
AT2G39800	1.17182	0.000185016	0.00505145	delta1-pyrroline-5-carboxylate synthase 1 (P5CS1)
AT2G40000	-1.77826	2.851e-09	3.0906e-07	ortholog of sugar beet HS1 PRO-1 2 (HSPRO2)
AT2G40020	1.07204	0.00207068	0.0329007	Nucleolar histone methyltransferase-related protein
AT2G40170	-1.18336	5.79079e-05	0.00192205	LATE EMBRYOGENESIS ABUNDANT 6 (GEA6)
AT2G40420	-1.13044	0.000173477	0.00480799	Transmembrane amino acid transporter family protein
AT2G40435	5.29326	7.21638e-08	5.75376e-06	BEST Arabidopsis thaliana protein match is: transcription regulators (TAIR:AT3G56220.1)
AT2G40520	1.57794	1.44929e-06	8.38233e-05	Nucleotidyltransferase family protein
AT2G40610	-1.03685	0.000486152	0.010752	expansin A8 (EXPA8)
AT2G40670	1.77668	4.79866e-06	0.000235713	response regulator 16 (RR16)
AT2G41010	-1.20006	8.90359e-05	0.00278709	calmodulin (CAM)-binding protein of 25 kDa (CAMBP25)
AT2G41070	-2.17401	1.0397e-12	2.02475e-10	ENHANCED EM LEVEL (EEL)
AT2G41260	-2.64034	1.34878e-17	5.39661e-15	M17
AT2G41280	-1.41291	3.58875e-06	0.000182389	M10
AT2G41850	-1.17731	9.30864e-05	0.00289098	polygalacturonase abscission zone A. thaliana (PGAZAT)
AT2G41990	1.16126	0.00023488	0.0060809	CONTAINS InterPro DOMAIN/s: Late embryogenesis abundant protein, group 2 (InterPro:IPR004864)
AT2G42010	-1.01382	0.000673612	0.013945	phospholipase D beta 1 (PLDBETA1)
AT2G42220	1.82094	1.30745e-09	1.52231e-07	Rhodanese/Cell cycle control phosphatase superfamily protein
AT2G42560	-1.7602	9.51448e-09	9.47401e-07	late embryogenesis abundant domain-containing protein / LEA domain-containing protein
AT2G42870	-1.09024	0.000210448	0.00560064	PHY RAPIDLY REGULATED 1 (PAR1)
AT2G43050	-1.67662	2.0438e-08	1.85086e-06	ATPMEPCRD
AT2G43550	2.69456	3.99905e-13	8.46183e-11	Scorpion toxin-like knottin superfamily protein
AT2G43600	1.42211	0.000379259	0.00886926	Chitinase family protein
AT2G43800	1.30641	1.44451e-05	0.000600907	Actin-binding FH2 (formin homology 2) family protein
AT2G44220	-26.9027	0.00161056	0.0272631	Protein of Unknown Function (DUF239)
AT2G44290	1.42282	3.38951e-06	0.000175093	Bifunctional inhibitor/lipid-transfer protein/seed storage 2S albumin superfamily protein
AT2G45210	-1.08083	0.000401299	0.00924124	SAUR-like auxin-responsive protein family
AT2G46270	-1.45636	1.90759e-06	0.000105739	G-box binding factor 3 (GBF3)
AT2G46535	1.13418	0.000336629	0.00814945	unknown protein
AT2G46600	-1.05257	0.000334343	0.00811197	Calcium-binding EF-hand family protein
AT2G46640	1.91132	5.73811e-07	3.71391e-05	unknown protein
AT2G46660	-1.39726	8.80172e-06	0.00039368	cytochrome P450, family 78, subfamily A, polypeptide 6 (CYP78A6)
AT2G46750	-1.35317	4.02024e-05	0.00144322	D-arabinono-1,4-lactone oxidase family protein
AT2G46950	-1.04949	0.00109648	0.020177	cytochrome P450, family 709, subfamily B, polypeptide 2 (CYP709B2)
AT2G46970	-6.03576	4.89559e-55	5.38662e-51	phytochrome interacting factor 3-like 1 (PIL1)
AT2G47160	-1.01788	0.000690369	0.0141192	REQUIRES HIGH BORON 1 (BOR1)
AT2G47270	-1.06689	0.00029984	0.00738062	sequence-specific DNA binding transcription factors
AT2G47370	1.79519	7.46852e-05	0.00239581	Calcium-dependent phosphotriesterase superfamily protein
AT2G47450	1.30279	1.01751e-05	0.000443288	CHAOS (CAO)
AT2G47520	2.20397	3.79515e-07	2.59367e-05	HYPOXIA RESPONSIVE ERF (ETHYLENE RESPONSE FACTOR) 2 (HRE2)
AT2G47750	2.97863	2.5693e-06	0.000137902	putative indole-3-acetic acid-amido synthetase GH3.9 (GH3.9)
AT2G47770	-2.4295	2.11444e-15	6.46256e-13	TSPO(outer membrane tryptophan-rich sensory protein)-related (TSPO)
AT3G01220	-1.0945	0.00019773	0.00535208	homeobox protein 20 (HB20)
AT3G01500	1.63776	4.03061e-08	3.46475e-06	carbonic anhydrase 1 (CA1)
AT3G01570	-2.01719	2.1868e-11	3.65948e-09	Oleosin family protein
AT3G01920	2.61561	1.00669e-13	2.40797e-11	DHBP synthase RibB-like alpha/beta domain
AT3G02020	3.7075	0.000108098	0.0032676	aspartate kinase 3 (AK3)
AT3G02040	-1.04871	0.000535413	0.011574	senescence-related gene 3 (SRG3)
AT3G02380	2.54424	7.92591e-13	1.58562e-10	CONSTANS-like 2 (COL2)
AT3G02670	2.38434	4.54129e-08	3.79983e-06	Glycine-rich protein family
AT3G02730	1.07546	0.000348644	0.00834701	thioredoxin F-type 1 (TRXF1)
AT3G02830	1.03632	0.00123798	0.0221667	zinc finger protein 1 (ZFN1)
AT3G02885	2.5854	4.64885e-05	0.00160853	GAST1 protein homolog 5 (GASA5)
AT3G03130	1.33118	1.83152e-05	0.000738175	unknown protein
AT3G03240	-2.06041	0.000360498	0.00853023	alpha/beta-Hydrolases superfamily protein
AT3G03910	-3.56831	2.73849e-05	0.00103413	glutamate dehydrogenase 3 (GDH3)
AT3G04010	-1.09088	0.000645064	0.0135193	O-Glycosyl hydrolases family 17 protein
AT3G04290	1.26843	1.68353e-05	0.000687343	Li-tolerant lipase 1 (LTL1)
AT3G04770	1.15757	0.000115558	0.00345514	40s ribosomal protein SA B (RPSAb)
AT3G04800	2.35231	3.66065e-05	0.00133151	translocase inner membrane subunit 23-3 (TIM23-3)
AT3G05150	-1.14783	0.000102784	0.00312845	Major facilitator superfamily protein
AT3G05152	-1.62103	0.000401884	0.00924124	other RNA
AT3G05260	-1.45641	1.67442e-06	9.49673e-05	NAD(P)-binding Rossmann-fold superfamily protein
AT3G05340	1.37208	0.00281759	0.0417816	Tetratricopeptide repeat (TPR)-like superfamily protein
AT3G05600	2.00254	5.175e-11	8.13436e-09	alpha/beta-Hydrolases superfamily protein
AT3G05660	-1.26639	0.000949008	0.0182441	receptor like protein 33 (RLP33)
AT3G05730	1.39054	2.5233e-06	0.000135765	LOCATED IN: endomembrane system
AT3G05900	-1.01713	0.000530541	0.0115025	neurofilament protein-related
AT3G05920	-1.11129	0.000180227	0.00493908	Heavy metal transport/detoxification superfamily protein
AT3G06020	2.18185	3.43931e-06	0.000176835	Protein of unknown function (DUF3049)
AT3G06455	-1.71673	0.000342738	0.00826099	ubiquitin family protein
AT3G06680	1.1268	0.000166403	0.00466848	Ribosomal L29e protein family
AT3G06850	-1.20934	4.7464e-05	0.00163457	BCE2
AT3G06880	2.10839	1.27973e-06	7.52986e-05	Transducin/WD40 repeat-like superfamily protein
AT3G07380	-2.04339	0.00101024	0.0190827	Domain of unknown function (DUF23)
AT3G08860	-2.27748	6.07025e-06	0.000291663	PYRIMIDINE 4 (PYD4)
AT3G08940	1.42704	1.43791e-06	8.34901e-05	light harvesting complex photosystem II (LHCB4.2)
AT3G09680	1.51844	0.000834615	0.016487	Ribosomal protein S12/S23 family protein
AT3G10040	1.27136	4.11766e-05	0.00146623	sequence-specific DNA binding transcription factors
AT3G10290	-1.88824	1.75593e-07	1.27528e-05	Nucleotide-sugar transporter family protein
AT3G10520	1.64525	3.57262e-08	3.13224e-06	haemoglobin 2 (HB2)
AT3G10570	2.68197	2.22881e-07	1.59763e-05	cytochrome P450, family 77, subfamily A, polypeptide 6 (CYP77A6)
AT3G10870	1.09917	0.000488602	0.0107677	methyl esterase 17 (MES17)
AT3G10985	-1.3187	7.89847e-06	0.000361083	senescence associated gene 20 (SAG20)
AT3G11050	-1.10895	0.000235936	0.0060945	ferritin 2 (FER2)
AT3G11570	-1.56141	0.000109433	0.00329887	TRICHOME BIREFRINGENCE-LIKE 8 (TBL8)
AT3G11840	-2.29923	3.33687e-05	0.00122794	plant U-box 24 (PUB24)
AT3G12820	-3.03186	1.17597e-20	6.8101e-18	myb domain protein 10 (MYB10)
AT3G12870	1.14325	0.000148484	0.00423806	unknown protein
AT3G12981	26.9743	0.000885372	0.0172365	pseudogene of F-box family protein
AT3G13650	1.24955	2.50975e-05	0.000965553	Disease resistance-responsive (dirigent-like protein) family protein
AT3G14210	5.41082	3.03229e-48	1.33457e-44	epithiospecifier modifier 1 (ESM1)
AT3G14260	-1.32764	1.45678e-05	0.000604864	Protein of unknown function (DUF567)
AT3G14440	-1.48563	0.000137551	0.00397237	nine-cis-epoxycarotenoid dioxygenase 3 (NCED3)
AT3G14540	1.47119	9.09803e-05	0.00283585	Terpenoid cyclases/Protein prenyltransferases superfamily protein
AT3G14670	-3.12534	0.000699804	0.0142724	unknown protein
AT3G14735	1.13219	0.00263524	0.0397744	gi|16516|emb|X52527.1|ATSNU61 Arabidopsis thaliana U6-1 snRNA gene
AT3G14760	2.00356	1.11369e-10	1.63437e-08	unknown protein
AT3G14770	1.24273	9.9062e-05	0.00303615	Nodulin MtN3 family protein
AT3G14880	-1.59819	0.00188302	0.0307173	BEST Arabidopsis thaliana protein match is: transcription factor-related (TAIR:AT4G18650.1)
AT3G15450	-1.57925	1.04701e-07	8.02808e-06	Aluminium induced protein with YGL and LRDR motifs
AT3G15500	-1.5803	1.72959e-07	1.26031e-05	NAC domain containing protein 3 (NAC3)
AT3G15540	-1.5059	5.14905e-07	3.37232e-05	indole-3-acetic acid inducible 19 (IAA19)
AT3G15550	1.4173	0.000137076	0.00396386	unknown protein
AT3G15570	1.2489	4.12434e-05	0.00146624	Phototropic-responsive NPH3 family protein
AT3G15620	-1.59083	0.000481174	0.0106634	UV REPAIR DEFECTIVE 3 (UVR3)
AT3G15650	1.00318	0.00246705	0.0378327	alpha/beta-Hydrolases superfamily protein
AT3G15670	-1.14885	9.30697e-05	0.00289098	Late embryogenesis abundant protein (LEA) family protein
AT3G15680	1.22574	6.93074e-05	0.00224953	Ran BP2/NZF zinc finger-like superfamily protein
AT3G15780	-1.34227	0.000245448	0.00631735	unknown protein
AT3G15850	1.05163	0.000349878	0.00835078	fatty acid desaturase 5 (FAD5)
AT3G16120	-1.61592	8.25681e-07	5.11829e-05	Dynein light chain type 1 family protein
AT3G16360	2.46727	2.03516e-09	2.28413e-07	HPT phosphotransmitter 4 (AHP4)
AT3G16520	1.047	0.000394199	0.0091783	UDP-glucosyl transferase 88A1 (UGT88A1)
AT3G16660	1.76855	5.60598e-09	5.81912e-07	Pollen Ole e 1 allergen and extensin family protein
AT3G16670	3.75928	2.52691e-14	6.24799e-12	Pollen Ole e 1 allergen and extensin family protein
AT3G17040	1.02169	0.000612897	0.0129562	high chlorophyll fluorescent 107 (HCF107)
AT3G17050	-1.3335	7.40602e-06	0.000343109	pseudogene, glycine-rich protein, similar to glycine-rich protein TIGR:At1g53620.1 (Arabidopsis thaliana)
AT3G17100	-1.00493	0.000631923	0.0132945	sequence-specific DNA binding transcription factors
AT3G17110	-1.45329	9.41074e-06	0.000416686	pseudogene, glycine-rich protein
AT3G17520	-1.63848	3.97531e-08	3.43061e-06	Late embryogenesis abundant protein (LEA) family protein
AT3G17580	-1.9346	5.9703e-10	7.46492e-08	unknown protein
AT3G18530	-1.91336	6.84682e-09	7.00796e-07	ARM repeat superfamily protein
AT3G18570	-1.18072	0.00206639	0.0328562	Oleosin family protein
AT3G18773	-1.2057	7.04252e-05	0.0022724	RING/U-box superfamily protein
AT3G18890	1.35924	2.81623e-05	0.00105939	NAD(P)-binding Rossmann-fold superfamily protein
AT3G18900	2.10385	3.86127e-07	2.63069e-05	FUNCTIONS IN: molecular_function unknown
AT3G18950	-2.45189	1.11149e-05	0.000478194	Transducin/WD40 repeat-like superfamily protein
AT3G19300	1.88496	0.000329384	0.00801817	Protein kinase superfamily protein
AT3G19430	2.80357	5.43472e-08	4.47927e-06	late embryogenesis abundant protein-related / LEA protein-related
AT3G19480	1.67028	5.05576e-07	3.32111e-05	D-3-phosphoglycerate dehydrogenase
AT3G19580	-1.14741	0.000413695	0.00946424	zinc-finger protein 2 (ZF2)
AT3G19710	3.23235	1.03212e-17	4.36785e-15	branched-chain aminotransferase4 (BCAT4)
AT3G20160	1.41975	0.0010778	0.0199815	Terpenoid synthases superfamily protein
AT3G20340	-1.16094	0.00010478	0.00318039	FUNCTIONS IN: molecular_function unknown
AT3G20370	1.00032	0.000681667	0.0140588	TRAF-like family protein
AT3G20470	-1.99553	3.96082e-11	6.31608e-09	glycine-rich protein 5 (GRP5)
AT3G20600	1.94693	1.00608e-07	7.82327e-06	non race-specific disease resistance 1 (NDR1)
AT3G20660	-1.06381	0.00053326	0.0115501	organic cation/carnitine transporter4 (4-Oct)
AT3G20810	-1.72679	1.33885e-08	1.28099e-06	2-oxoglutarate (2OG) and Fe(II)-dependent oxygenase superfamily protein
AT3G20940	1.0089	0.000680977	0.0140588	cytochrome P450, family 705, subfamily A, polypeptide 30 (CYP705A30)
AT3G21055	1.53958	2.11836e-07	1.52342e-05	photosystem II subunit T (PSBTN)
AT3G21090	-1.17077	9.70658e-05	0.00299523	ABC-2 type transporter family protein
AT3G21330	-1.42761	1.64424e-06	9.37389e-05	basic helix-loop-helix (bHLH) DNA-binding superfamily protein
AT3G21670	-3.21502	4.29075e-22	3.25594e-19	Major facilitator superfamily protein
AT3G21760	1.03084	0.000839031	0.0165594	HYPOSTATIN RESISTANCE 1 (HYR1)
AT3G21950	2.29933	1.05881e-09	1.26631e-07	S-adenosyl-L-methionine-dependent methyltransferases superfamily protein
AT3G22090	2.17185	1.06225e-05	0.00046106	unknown protein
AT3G22550	1.36248	9.10193e-06	0.00040464	Protein of unknown function (DUF581)
AT3G22840	-2.60523	2.69111e-05	0.00102458	EARLY LIGHT-INDUCABLE PROTEIN (ELIP1)
AT3G23050	-1.07971	0.000233335	0.00606946	indole-3-acetic acid 7 (IAA7)
AT3G23210	1.21454	0.00213233	0.0335892	basic Helix-Loop-Helix 34 (bHLH34)
AT3G23250	-3.00817	6.63104e-05	0.0021747	myb domain protein 15 (MYB15)
AT3G23410	1.73071	3.41231e-06	0.000175858	fatty alcohol oxidase 3 (FAO3)
AT3G24450	-1.20648	4.4884e-05	0.00156284	Heavy metal transport/detoxification superfamily protein
AT3G24715	-1.5598	4.17171e-05	0.0014783	Protein kinase superfamily protein with octicosapeptide/Phox/Bem1p domain
AT3G24927	-1.61518	5.8774e-08	4.80811e-06	expressed protein
AT3G25730	-1.3387	7.51526e-06	0.000347439	ethylene response DNA binding factor 3 (EDF3)
AT3G25770	3.57855	6.99544e-13	1.41231e-10	allene oxide cyclase 2 (AOC2)
AT3G25790	2.59022	1.33081e-07	9.99516e-06	myb-like transcription factor family protein
AT3G26050	1.24699	0.000953722	0.0182597	TPX2 (targeting protein for Xklp2) protein family
AT3G26165	-1.58513	8.62975e-05	0.0027364	pseudogene, cytochrome P450, potential frameshift mutation
AT3G26510	-1.54217	2.51466e-07	1.79667e-05	Octicosapeptide/Phox/Bem1p family protein
AT3G26570	1.01567	0.000551485	0.0118747	phosphate transporter 2
AT3G27250	-27.4263	8.68372e-05	0.0027456	unknown protein
AT3G27690	2.40317	3.78413e-15	1.11031e-12	photosystem II light harvesting complex gene 2.3 (LHCB2.3)
AT3G28070	2.06393	6.85975e-06	0.0003205	nodulin MtN21 /EamA-like transporter family protein
AT3G28340	-1.05647	0.000478374	0.0106227	galacturonosyltransferase-like 10 (GATL10)
AT3G28740	-1.08078	0.000309551	0.00761114	CYP81D1
AT3G28857	-2.27614	4.31077e-13	8.94933e-11	basic helix-loop-helix (bHLH) DNA-binding family protein
AT3G29410	-1.49679	5.18173e-06	0.000252277	Terpenoid cyclases/Protein prenyltransferases superfamily protein
AT3G29575	-1.94472	1.30675e-10	1.85524e-08	ABI five binding protein 3 (AFP3)
AT3G29680	1.53783	0.000973338	0.0185128	HXXXD-type acyl-transferase family protein
AT3G30180	-1.19994	7.33364e-05	0.00235942	brassinosteroid-6-oxidase 2 (BR6OX2)
AT3G30720	6.24192	1.35735e-54	7.81532e-51	QUA-QUINE STARCH (QQS)
AT3G30775	-1.52903	3.03857e-07	2.13484e-05	EARLY RESPONSIVE TO DEHYDRATION 5 (ERD5)
AT3G42658	-1.27389	6.47749e-05	0.0021307	transposable element gene
AT3G42725	1.61851	1.35708e-06	7.96006e-05	Putative membrane lipoprotein
AT3G43110	1.60506	0.000368454	0.00869637	unknown protein
AT3G43190	1.05428	0.00203267	0.0324372	sucrose synthase 4 (SUS4)
AT3G43270	-1.221	5.80198e-05	0.00192287	Plant invertase/pectin methylesterase inhibitor superfamily
AT3G43715	28.1431	6.79302e-07	4.29561e-05	pseudogene, hypothetical protein, similar to putative non-LTR retroelement reverse transcriptase
AT3G44290	-1.6512	0.000862399	0.0168566	NAC domain containing protein 60 (NAC060)
AT3G44320	1.06539	0.000378045	0.00885027	nitrilase 3 (NIT3)
AT3G44540	3.901	0.00195167	0.0314872	fatty acid reductase 4 (FAR4)
AT3G45070	1.85443	6.71454e-09	6.90469e-07	P-loop containing nucleoside triphosphate hydrolases superfamily protein
AT3G45680	2.71668	1.68033e-06	9.50572e-05	Major facilitator superfamily protein
AT3G45730	-1.05266	0.000383234	0.00895271	unknown protein
AT3G46490	1.74172	0.00064611	0.0135283	2-oxoglutarate (2OG) and Fe(II)-dependent oxygenase superfamily protein
AT3G46780	1.37914	3.29821e-06	0.000170778	plastid transcriptionally active 16 (PTAC16)
AT3G46870	1.09724	0.00127056	0.0225477	Pentatricopeptide repeat (PPR) superfamily protein
AT3G46900	1.56648	1.00422e-05	0.000439341	copper transporter 2 (COPT2)
AT3G47220	-1.68672	4.6881e-05	0.00161956	phosphatidylinositol-speciwc phospholipase C9 (PLC9)
AT3G47250	1.66399	4.51265e-06	0.000223158	Plant protein of unknown function (DUF247)
AT3G47340	-2.63319	1.49105e-17	5.85931e-15	glutamine-dependent asparagine synthase 1 (ASN1)
AT3G47470	1.7016	1.11318e-08	1.0936e-06	light-harvesting chlorophyll-protein complex I subunit A4 (LHCA4)
AT3G48240	-1.20975	0.000124581	0.00366515	Octicosapeptide/Phox/Bem1p family protein
AT3G48260	-2.7606	3.87685e-16	1.37603e-13	with no lysine (K) kinase 3 (WNK3)
AT3G48340	1.10227	0.000201964	0.00542665	Cysteine proteinases superfamily protein
AT3G48350	1.32927	8.88572e-06	0.000396631	Cysteine proteinases superfamily protein
AT3G48390	-1.99409	1.12146e-10	1.63437e-08	MA3 domain-containing protein
AT3G48720	1.97148	3.15011e-07	2.18679e-05	HXXXD-type acyl-transferase family protein
AT3G49360	-3.73774	8.18039e-23	6.92376e-20	6-phosphogluconolactonase 2 (PGL2)
AT3G50070	1.01196	0.000588388	0.0124981	CYCLIN D3
AT3G50270	1.78494	1.41865e-08	1.32846e-06	HXXXD-type acyl-transferase family protein
AT3G50685	1.2073	4.45128e-05	0.00155731	unknown protein
AT3G50770	-2.1156	5.07605e-10	6.41974e-08	calmodulin-like 41 (CML41)
AT3G50820	1.63702	4.24825e-08	3.63762e-06	photosystem II subunit O-2 (PSBO2)
AT3G51240	1.17597	0.000162355	0.00459227	flavanone 3-hydroxylase (F3H)
AT3G51810	-2.86286	5.88536e-20	3.15886e-17	LATE EMBRYOGENESIS ABUNDANT 1 (EM1)
AT3G51870	1.08888	0.000348962	0.00834701	Mitochondrial substrate carrier family protein
AT3G51895	-2.20075	4.77291e-12	8.53925e-10	sulfate transporter 3
AT3G52525	1.00983	0.00212879	0.0335575	ovate family protein 6 (OFP6)
AT3G52540	1.22807	0.000152464	0.00433477	ovate family protein 18 (OFP18)
AT3G53040	-1.29909	1.23388e-05	0.000525199	late embryogenesis abundant protein, putative / LEA protein, putative
AT3G53190	1.34041	1.82042e-05	0.00073505	Pectin lyase-like superfamily protein
AT3G53200	-1.60245	4.15876e-07	2.7987e-05	myb domain protein 27 (MYB27)
AT3G54000	-1.13736	0.000254194	0.00648181	CONTAINS InterPro DOMAIN/s: Uncharacterised conserved protein UCP022260 (InterPro:IPR016802)
AT3G54510	-1.07169	0.00113222	0.0206426	Early-responsive to dehydration stress protein (ERD4)
AT3G54600	1.49863	9.4957e-06	0.000417925	Class I glutamine amidotransferase-like superfamily protein
AT3G54710	1.13957	0.0014887	0.0256943	homolog of yeast CDT1 B homolog of yeast CDT1 B (CDT1B)
AT3G54830	-2.75617	5.90977e-16	1.97046e-13	Transmembrane amino acid transporter family protein
AT3G54890	2.72413	1.21816e-18	5.70356e-16	photosystem I light harvesting complex gene 1 (LHCA1)
AT3G54900	1.12344	0.000132221	0.00384366	CAX interacting protein 1 (CXIP1)
AT3G54940	-1.13906	0.000111108	0.00334104	Papain family cysteine protease
AT3G55110	2.26081	9.26696e-06	0.000411147	ABC-2 type transporter family protein
AT3G55120	1.7847	4.64908e-09	4.8718e-07	TRANSPARENT TESTA 5 (TT5)
AT3G55610	-1.11588	0.000166535	0.00466848	delta 1-pyrroline-5-carboxylate synthase 2 (P5CS2)
AT3G55710	1.3454	0.000276155	0.00690576	UDP-Glycosyltransferase superfamily protein
AT3G55940	-2.62757	5.73874e-06	0.000276944	Phosphoinositide-specific phospholipase C family protein
AT3G55970	2.05751	1.26679e-05	0.000537127	jasmonate-regulated gene 21 (JRG21)
AT3G56080	2.92898	7.82673e-18	3.4447e-15	S-adenosyl-L-methionine-dependent methyltransferases superfamily protein
AT3G56210	-1.13328	0.000333686	0.00810497	ARM repeat superfamily protein
AT3G56220	1.32872	4.70856e-05	0.00162408	transcription regulators
AT3G56730	1.25755	0.000954913	0.0182597	Putative endonuclease or glycosyl hydrolase
AT3G56940	1.0964	0.000185643	0.00506229	COPPER RESPONSE DEFECT 1 (CRD1)
AT3G57160	1.00162	0.000951342	0.0182441	unknown protein
AT3G58850	-1.14187	0.000108924	0.00328804	PHY RAPIDLY REGULATED 2 (PAR2)
AT3G58990	3.01022	1.58812e-12	2.96171e-10	isopropylmalate isomerase 1 (IPMI1)
AT3G59060	-6.20441	5.32114e-22	3.77732e-19	phytochrome interacting factor 3-like 6 (PIL6)
AT3G59200	1.14155	0.000431099	0.00973002	F-box/RNI-like superfamily protein
AT3G59250	2.756	1.49106e-11	2.56346e-09	F-box/RNI-like superfamily protein
AT3G59340	1.80769	3.4691e-09	3.68797e-07	Eukaryotic protein of unknown function (DUF914)
AT3G59370	-1.14319	0.000104368	0.00317227	Vacuolar calcium-binding protein-related
AT3G59400	1.49854	4.67908e-07	3.12024e-05	GENOMES UNCOUPLED 4 (GUN4)
AT3G59690	-1.15991	0.000123185	0.00364186	IQ-domain 13 (IQD13)
AT3G60140	-3.86134	1.18186e-31	2.16734e-28	DARK INDUCIBLE 2 (DIN2)
AT3G60520	-1.3167	4.10144e-05	0.00146282	unknown protein
AT3G60900	1.37591	4.27964e-05	0.00150926	FASCICLIN-like arabinogalactan-protein 10 (FLA10)
AT3G61060	-1.45399	1.0902e-06	6.57203e-05	phloem protein 2-A13 (PP2-A13)
AT3G61250	1.84946	3.50943e-05	0.00128287	myb domain protein 17 (MYB17)
AT3G61470	1.63326	4.40062e-08	3.72266e-06	photosystem I light harvesting complex gene 2 (LHCA2)
AT3G61680	-1.41214	2.29225e-05	0.000891224	alpha/beta-Hydrolases superfamily protein
AT3G61820	1.15674	9.89357e-05	0.00303615	Eukaryotic aspartyl protease family protein
AT3G61830	-1.4587	1.93e-06	0.000106247	auxin response factor 18 (ARF18)
AT3G61920	2.75425	4.25722e-13	8.92232e-11	unknown protein
AT3G61950	2.29513	0.00147892	0.0255857	basic helix-loop-helix (bHLH) DNA-binding superfamily protein
AT3G62090	-3.56012	1.0027e-18	4.90344e-16	phytochrome interacting factor 3-like 2 (PIL2)
AT3G63350	-2.64658	1.54734e-11	2.63959e-09	AT-HSFA7B
AT4G00165	1.0822	0.000399651	0.00923814	Bifunctional inhibitor/lipid-transfer protein/seed storage 2S albumin superfamily protein
AT4G00880	2.46542	7.51287e-09	7.65409e-07	SAUR-like auxin-responsive protein family
AT4G00950	1.69601	2.73969e-05	0.00103413	maternal effect embryo arrest 47 (MEE47)
AT4G01250	-1.17003	0.000189179	0.00514595	WRKY22
AT4G01335	-2.52769	1.65878e-12	3.06749e-10	FUNCTIONS IN: molecular_function unknown
AT4G01510	-1.17399	0.000128541	0.00375653	ARV2
AT4G01515	-2.6313	0.000247488	0.00636242	non-LTR retrotransposon family (LINE), has a 1.1e-18 P-value blast match to GB:AAB41224 ORF2 (LINE-element) (Rattus norvegicus)
AT4G01525	-3.04596	7.52869e-22	4.87283e-19	transposable element gene
AT4G01890	2.32833	0.000168252	0.00470463	Pectin lyase-like superfamily protein
AT4G01915	2.16059	0.000658692	0.0137265	unknown protein
AT4G02290	-1.35924	6.63627e-06	0.000313386	glycosyl hydrolase 9B13 (GH9B13)
AT4G02630	1.23452	0.000758858	0.0152925	Protein kinase superfamily protein
AT4G02690	-1.31781	0.000336029	0.0081439	Bax inhibitor-1 family protein
AT4G02770	1.26034	1.86455e-05	0.000748744	photosystem I subunit D-1 (PSAD-1)
AT4G02800	1.16364	0.000152868	0.00434066	unknown protein
AT4G02850	1.78945	1.8117e-07	1.31145e-05	phenazine biosynthesis PhzC/PhzF family protein
AT4G03100	1.14778	9.82656e-05	0.00302438	Rho GTPase activating protein with PAK-box/P21-Rho-binding domain
AT4G03150	1.16778	8.88565e-05	0.00278709	unknown protein
AT4G04220	-2.90283	0.000555247	0.0119207	receptor like protein 46 (RLP46)
AT4G04570	3.95955	4.30521e-08	3.67211e-06	cysteine-rich RLK (RECEPTOR-like protein kinase) 40 (CRK40)
AT4G04840	3.34225	1.12913e-24	1.12944e-21	methionine sulfoxide reductase B6 (MSRB6)
AT4G04850	1.23221	0.00012254	0.00363425	K+ efflux antiporter 3 (KEA3)
AT4G04990	-27.2496	0.000273446	0.0068536	Protein of unknown function (DUF761)
AT4G05180	1.79843	1.78993e-09	2.0409e-07	photosystem II subunit Q-2 (PSBQ-2)
AT4G05440	1.12741	0.00191867	0.0311603	embryo sac development arrest 35 (EDA35)
AT4G06498	-27.0422	0.000490287	0.0107677	pseudogene, vacuolar sorting receptor -related, similar to BP-80 vacuolar sorting receptor GP:1737222 {Pisum sativum}
AT4G08620	1.33512	4.86418e-05	0.00167252	sulphate transporter 1
AT4G09500	1.15779	0.000585183	0.0124421	UDP-Glycosyltransferase superfamily protein
AT4G09600	-2.0408	7.92739e-11	1.20311e-08	GAST1 protein homolog 3 (GASA3)
AT4G09610	-1.94003	1.71353e-05	0.000698293	GAST1 protein homolog 2 (GASA2)
AT4G09650	1.38377	2.90676e-06	0.000153029	ATP synthase delta-subunit gene (ATPD)
AT4G09760	-1.19753	0.000277425	0.00692178	Protein kinase superfamily protein
AT4G10020	-1.91082	2.90624e-10	3.87605e-08	hydroxysteroid dehydrogenase 5 (HSD5)
AT4G10160	-2.20495	1.83049e-08	1.67145e-06	RING/U-box superfamily protein
AT4G10240	-3.69085	6.62101e-20	3.46909e-17	B-box zinc finger family protein
AT4G10250	-1.5996	3.94344e-05	0.00142261	ATHSP22.0
AT4G10340	1.38828	2.59175e-06	0.000138769	light harvesting complex of photosystem II 5 (LHCB5)
AT4G11050	-3.04393	2.83833e-06	0.000150145	glycosyl hydrolase 9C3 (GH9C3)
AT4G11210	1.48886	9.69495e-07	5.95942e-05	Disease resistance-responsive (dirigent-like protein) family protein
AT4G11320	1.94206	1.01833e-10	1.52444e-08	Papain family cysteine protease
AT4G11460	2.76301	1.35163e-08	1.28252e-06	cysteine-rich RLK (RECEPTOR-like protein kinase) 30 (CRK30)
AT4G11610	-1.84327	8.32443e-10	1.01771e-07	C2 calcium/lipid-binding plant phosphoribosyltransferase family protein
AT4G11650	-2.75298	5.19438e-16	1.75858e-13	osmotin 34 (OSM34)
AT4G11780	1.44471	0.00233293	0.036103	unknown protein
AT4G12030	2.35776	0.000168252	0.00470463	bile acid transporter 5 (BAT5)
AT4G12310	1.45627	0.000235959	0.0060945	cytochrome P450, family 706, subfamily A, polypeptide 5 (CYP706A5)
AT4G12480	-1.16808	0.00151369	0.0260848	pEARLI 1
AT4G12520	-1.56779	1.39031e-07	1.03712e-05	Bifunctional inhibitor/lipid-transfer protein/seed storage 2S albumin superfamily protein
AT4G12800	1.12374	0.000128484	0.00375653	photosystem I subunit l (PSAL)
AT4G12870	1.13962	0.000128746	0.00375755	Gamma interferon responsive lysosomal thiol (GILT) reductase family protein
AT4G13210	-2.16898	6.44673e-11	9.92075e-09	Pectin lyase-like superfamily protein
AT4G13310	-1.47064	0.000746045	0.0151035	cytochrome P450, family 71, subfamily A, polypeptide 20 (CYP71A20)
AT4G13495	2.98163	1.52073e-12	2.88494e-10	other RNA
AT4G13540	-1.43416	2.72144e-06	0.000144657	unknown protein
AT4G13680	26.9368	0.00161056	0.0272631	Protein of unknown function (DUF295)
AT4G13690	1.64115	2.60328e-05	0.000992855	unknown protein
AT4G13770	2.5908	2.76044e-12	5.02036e-10	cytochrome P450, family 83, subfamily A, polypeptide 1 (CYP83A1)
AT4G13790	-2.15643	5.10469e-08	4.23901e-06	SAUR-like auxin-responsive protein family
AT4G13830	-1.22177	6.9275e-05	0.00224953	DNAJ-like 20 (J20)
AT4G14130	-4.29729	2.86318e-38	7.87589e-35	xyloglucan endotransglucosylase/hydrolase 15 (XTH15)
AT4G14330	1.11503	0.000940668	0.0181423	P-loop containing nucleoside triphosphate hydrolases superfamily protein
AT4G14380	-1.03654	0.00142056	0.0247512	unknown protein
AT4G14465	-1.22359	4.51121e-05	0.0015683	AT-hook motif nuclear-localized protein 20 (AHL20)
AT4G14480	1.35764	0.000546096	0.0117702	Protein kinase superfamily protein
AT4G14548	-1.25126	2.57216e-05	0.000984399	other RNA
AT4G14580	1.08604	0.00179954	0.029869	CBL-interacting protein kinase 4 (CIPK4)
AT4G14746	-1.00656	0.00204802	0.0326112	CONTAINS InterPro DOMAIN/s: EGF-like (InterPro:IPR006210)
AT4G15360	4.18846	0.000685382	0.0141077	cytochrome P450, family 705, subfamily A, polypeptide 3 (CYP705A3)
AT4G15610	-1.00831	0.000589018	0.0124994	Uncharacterised protein family (UPF0497)
AT4G15620	1.90336	1.20516e-08	1.16831e-06	Uncharacterised protein family (UPF0497)
AT4G15830	1.04683	0.000415717	0.00948395	ARM repeat superfamily protein
AT4G16000	-1.49573	0.000210476	0.00560064	unknown protein
AT4G16670	-2.74278	2.47201e-17	9.22017e-15	CONTAINS InterPro DOMAIN/s: Pleckstrin-like, plant (InterPro:IPR013666), Protein of unknown function DUF828 (InterPro:IPR008546), Pleckstrin homology (InterPro:IPR001849)
AT4G16770	-1.08782	0.000511824	0.0111738	2-oxoglutarate (2OG) and Fe(II)-dependent oxygenase superfamily protein
AT4G16780	-2.58099	1.77667e-15	5.50667e-13	homeobox protein 2 (HB-2)
AT4G16790	-1.16358	0.000145037	0.00414505	hydroxyproline-rich glycoprotein family protein
AT4G17470	2.04449	5.6508e-08	4.63998e-06	alpha/beta-Hydrolases superfamily protein
AT4G18210	-1.23755	0.000171075	0.0047594	purine permease 10 (PUP10)
AT4G18650	-2.20957	4.96169e-10	6.31139e-08	transcription factor-related
AT4G18690	-4.62721	9.43577e-19	4.71917e-16	unknown protein
AT4G18740	1.98678	2.04477e-09	2.28413e-07	Rho termination factor
AT4G19530	2.94051	1.37012e-07	1.02554e-05	disease resistance protein (TIR-NBS-LRR class) family
AT4G19645	1.30358	0.000260233	0.00660518	TRAM, LAG1 and CLN8 (TLC) lipid-sensing domain containing protein
AT4G20260	-1.20015	4.46964e-05	0.00155878	plasma-membrane associated cation-binding protein 1 (PCAP1)
AT4G20430	1.27724	0.00124918	0.0222767	Subtilase family protein
AT4G21020	-1.27011	1.77011e-05	0.000716047	Late embryogenesis abundant protein (LEA) family protein
AT4G22214	2.10604	9.78566e-12	1.72275e-09	Defensin-like (DEFL) family protein
AT4G22560	1.60825	7.89691e-07	4.9455e-05	unknown protein
AT4G22570	1.07214	0.000344453	0.00827901	adenine phosphoribosyl transferase 3 (APT3)
AT4G22690	1.42636	2.39878e-05	0.000926098	cytochrome P450, family 706, subfamily A, polypeptide 1 (CYP706A1)
AT4G22753	1.34853	0.000122115	0.00362653	sterol 4-alpha methyl oxidase 1-3 (SMO1-3)
AT4G23300	1.0307	0.00181805	0.0299911	cysteine-rich RLK (RECEPTOR-like protein kinase) 22 (CRK22)
AT4G23680	1.89071	2.85527e-10	3.83129e-08	Polyketide cyclase/dehydrase and lipid transport superfamily protein
AT4G23700	-1.69964	4.32811e-08	3.67739e-06	cation/H+ exchanger 17 (CHX17)
AT4G23870	-1.74986	8.30905e-09	8.34927e-07	unknown protein
AT4G24140	1.22716	0.00302914	0.0438837	alpha/beta-Hydrolases superfamily protein
AT4G24150	-1.24837	3.61141e-05	0.00131577	growth-regulating factor 8 (GRF8)
AT4G24230	-1.46777	1.0121e-06	6.18529e-05	acyl-CoA-binding domain 3 (ACBP3)
AT4G24265	1.72829	2.13735e-05	0.000844428	unknown protein
AT4G25010	1.9356	0.00118943	0.0215075	Nodulin MtN3 family protein
AT4G25050	1.24672	2.27447e-05	0.000887447	acyl carrier protein 4 (ACP4)
AT4G25200	1.27589	5.14698e-05	0.0017429	mitochondrion-localized small heat shock protein 23.6 (HSP23.6-MITO)
AT4G25260	-2.14252	1.56323e-12	2.94021e-10	Plant invertase/pectin methylesterase inhibitor superfamily protein
AT4G25390	-1.19878	9.60895e-05	0.00297404	Protein kinase superfamily protein
AT4G25470	-1.49791	0.000409416	0.00940461	C-repeat/DRE binding factor 2 (CBF2)
AT4G25580	-2.78909	1.83763e-17	7.00513e-15	CAP160 protein
AT4G25630	1.18843	5.4988e-05	0.00183343	fibrillarin 2 (FIB2)
AT4G25810	-1.04078	0.00198598	0.0318538	xyloglucan endotransglycosylase 6 (XTR6)
AT4G26150	1.21456	0.000331455	0.00805967	cytokinin-responsive gata factor 1 (CGA1)
AT4G26220	1.03367	0.000616923	0.0130288	S-adenosyl-L-methionine-dependent methyltransferases superfamily protein
AT4G26260	-1.45093	0.000420926	0.00956912	myo-inositol oxygenase 4 (MIOX4)
AT4G26740	-1.01979	0.00141386	0.0246736	seed gene 1 (ATS1)
AT4G26780	1.48808	3.74685e-06	0.000189984	AR192
AT4G26940	-1.0487	0.00044594	0.00998569	Galactosyltransferase family protein
AT4G27310	-1.21973	3.79942e-05	0.00137722	B-box type zinc finger family protein
AT4G27400	1.25658	0.000689382	0.0141192	Late embryogenesis abundant (LEA) protein-related
AT4G27460	-1.54957	2.97361e-07	2.09735e-05	Cystathionine beta-synthase (CBS) family protein
AT4G27520	1.47285	6.76458e-07	4.28995e-05	early nodulin-like protein 2 (ENODL2)
AT4G27570	3.32437	0.00112248	0.0204989	UDP-Glycosyltransferase superfamily protein
AT4G27670	2.34422	0.000690189	0.0141192	heat shock protein 21 (HSP21)
AT4G27700	1.24643	2.84884e-05	0.00106551	Rhodanese/Cell cycle control phosphatase superfamily protein
AT4G27790	-5.50872	8.25018e-24	7.56473e-21	Calcium-binding EF hand family protein
AT4G28040	-1.00774	0.000648444	0.0135643	nodulin MtN21 /EamA-like transporter family protein
AT4G28140	-2.61526	4.33701e-05	0.00152485	Integrase-type DNA-binding superfamily protein
AT4G28240	-1.01924	0.000803854	0.0159798	Wound-responsive family protein
AT4G28430	1.93059	4.40455e-05	0.00154588	Reticulon family protein
AT4G28520	-2.25635	1.3144e-13	3.013e-11	cruciferin 3 (CRU3)
AT4G28652	-1.18737	0.000129511	0.00376987	Potential natural antisense gene, locus overlaps with AT4G28650
AT4G28750	1.70882	9.92806e-09	9.8413e-07	PSA E1 KNOCKOUT (PSAE-1)
AT4G28780	4.86298	1.5843e-44	4.98059e-41	GDSL-like Lipase/Acylhydrolase superfamily protein
AT4G28790	-1.38433	0.00267268	0.0402016	basic helix-loop-helix (bHLH) DNA-binding superfamily protein
AT4G29270	-1.17825	7.5307e-05	0.00240523	HAD superfamily, subfamily IIIB acid phosphatase
AT4G29900	-1.09229	0.000347117	0.00832097	autoinhibited Ca(2+)-ATPase 10 (ACA10)
AT4G30180	-2.4781	2.18152e-14	5.58216e-12	sequence-specific DNA binding transcription factors
AT4G30230	1.733	1.66018e-05	0.000680333	unknown protein
AT4G30410	-1.04411	0.000415887	0.00948395	sequence-specific DNA binding transcription factors
AT4G30800	1.05247	0.000681528	0.0140588	Nucleic acid-binding, OB-fold-like protein
AT4G30975	-1.51218	5.76337e-05	0.00191584	other RNA
AT4G31000	-1.28493	0.00284182	0.0420275	Calmodulin-binding protein
AT4G31248	-1.40074	0.00081105	0.0160792	other RNA
AT4G31370	-3.14089	0.000437169	0.0098267	FASCICLIN-like arabinogalactan protein 5 precursor (FLA5)
AT4G31380	-3.4511	6.55996e-25	6.87421e-22	FPF1-like protein 1 (FLP1)
AT4G31610	-1.74207	4.11569e-06	0.00020678	REPRODUCTIVE MERISTEM 1 (REM1)
AT4G31805	1.00729	0.00102397	0.019243	WRKY family transcription factor
AT4G31830	-2.1502	9.36405e-10	1.12604e-07	unknown protein
AT4G31840	1.02236	0.00051087	0.0111641	early nodulin-like protein 15 (ENODL15)
AT4G32280	-2.66577	4.439e-16	1.55055e-13	indole-3-acetic acid inducible 29 (IAA29)
AT4G32460	-1.01364	0.000540235	0.0116667	FUNCTIONS IN: molecular_function unknown
AT4G32500	-3.23866	0.000987178	0.0187274	K+ transporter 5 (KT5)
AT4G32540	26.7783	0.00295179	0.0430465	YUCCA 1 (YUC1)
AT4G32950	-2.53574	0.000277035	0.00691989	Protein phosphatase 2C family protein
AT4G33070	1.47835	2.06419e-06	0.000112716	Thiamine pyrophosphate dependent pyruvate decarboxylase family protein
AT4G33467	-1.02751	0.00120885	0.021787	unknown protein
AT4G33560	1.53525	3.06634e-07	2.14216e-05	Wound-responsive family protein
AT4G33880	1.40877	0.000177368	0.00487895	ROOT HAIR DEFECTIVE 6-LIKE 2 (RSL2)
AT4G33905	2.79808	0.000268603	0.00677075	Peroxisomal membrane 22 kDa (Mpv17/PMP22) family protein
AT4G33980	-1.0971	0.000489672	0.0107677	BEST Arabidopsis thaliana protein match is: cold regulated gene 27 (TAIR:AT5G42900.2)
AT4G34138	-1.06993	0.000298692	0.0073606	UDP-glucosyl transferase 73B1 (UGT73B1)
AT4G34410	2.76064	0.00236316	0.0364682	redox responsive transcription factor 1 (RRTF1)
AT4G34510	1.69729	0.000870053	0.0169888	3-ketoacyl-CoA synthase 17 (KCS17)
AT4G34530	-1.61171	1.03726e-07	7.98107e-06	cryptochrome-interacting basic-helix-loop-helix 1 (CIB1)
AT4G34610	1.35875	3.43624e-05	0.0012603	BEL1-like homeodomain 6 (BLH6)
AT4G34740	1.2336	2.91952e-05	0.00108709	GLN phosphoribosyl pyrophosphate amidotransferase 2 (ASE2)
AT4G34770	-1.14319	0.000165097	0.00465573	SAUR-like auxin-responsive protein family
AT4G34790	1.00362	0.00124326	0.0221891	SAUR-like auxin-responsive protein family
AT4G35190	-1.18958	0.000703327	0.0143309	Putative lysine decarboxylase family protein
AT4G35720	-3.0184	8.06095e-21	4.7943e-18	Arabidopsis protein of unknown function (DUF241)
AT4G35730	1.00534	0.00109015	0.0201426	Regulator of Vps4 activity in the MVB pathway protein
AT4G35770	-1.70286	1.10208e-08	1.08755e-06	SENESCENCE 1 (SEN1)
AT4G36010	-1.543	2.63691e-07	1.86585e-05	Pathogenesis-related thaumatin superfamily protein
AT4G36110	-1.49793	1.19826e-06	7.12671e-05	SAUR-like auxin-responsive protein family
AT4G36220	2.5186	1.77811e-14	4.71434e-12	ferulic acid 5-hydroxylase 1 (FAH1)
AT4G36240	1.34036	2.57014e-05	0.000984399	GATA transcription factor 7 (GATA7)
AT4G36600	-1.23579	8.48756e-05	0.002703	Late embryogenesis abundant (LEA) protein
AT4G36700	-2.46363	1.39373e-14	3.8338e-12	RmlC-like cupins superfamily protein
AT4G36770	4.65653	3.24802e-05	0.00119725	UDP-Glycosyltransferase superfamily protein
AT4G37150	1.87423	6.61782e-06	0.000313187	methyl esterase 9 (MES9)
AT4G37160	1.8231	3.58877e-06	0.000182389	SKU5 similar 15 (sks15)
AT4G37235	2.47395	6.37177e-07	4.08797e-05	Uncharacterised protein family (UPF0497)
AT4G37410	2.17347	3.69777e-10	4.84364e-08	cytochrome P450, family 81, subfamily F, polypeptide 4 (CYP81F4)
AT4G37490	1.37287	0.000119115	0.00354224	CYCLIN B1
AT4G37610	-1.30382	1.87453e-05	0.000751381	BTB and TAZ domain protein 5 (BT5)
AT4G37740	-1.05308	0.000392938	0.00915996	growth-regulating factor 2 (GRF2)
AT4G37770	-2.68197	3.53625e-13	7.6293e-11	1-amino-cyclopropane-1-carboxylate synthase 8 (ACS8)
AT4G37800	3.90726	5.18418e-33	1.03712e-29	xyloglucan endotransglucosylase/hydrolase 7 (XTH7)
AT4G37810	1.46523	0.000633044	0.0133054	unknown protein
AT4G38400	-1.85446	8.01854e-10	9.85787e-08	expansin-like A2 (EXLA2)
AT4G38580	-1.12836	0.000123293	0.00364186	farnesylated protein 6 (FP6)
AT4G38840	1.72475	8.87051e-09	8.87292e-07	SAUR-like auxin-responsive protein family
AT4G38860	-1.33711	6.73081e-06	0.00031717	SAUR-like auxin-responsive protein family
AT4G39480	1.07808	0.00171979	0.0287581	cytochrome P450, family 96, subfamily A, polypeptide 9 (CYP96A9)
AT4G39510	2.04299	1.14854e-10	1.65195e-08	cytochrome P450, family 96, subfamily A, polypeptide 12 (CYP96A12)
AT5G01015	1.25376	0.00196412	0.0316125	unknown protein
AT5G01215	-1.13066	0.000711584	0.0144724	other RNA
AT5G01300	-1.71116	4.41523e-08	3.72266e-06	PEBP (phosphatidylethanolamine-binding protein) family protein
AT5G01330	-2.60656	1.81535e-14	4.75578e-12	pyruvate decarboxylase-3 (PDC3)
AT5G01335	-3.74095	0.00115461	0.020964	non-LTR retrotransposon family (LINE), has a 3.4e-29 P-value blast match to GB:AAA67727 reverse transcriptase (LINE-element) (Mus musculus)
AT5G01530	1.39325	2.40389e-06	0.000129657	light harvesting complex photosystem II (LHCB4.1)
AT5G01670	-2.33677	5.89684e-14	1.426e-11	NAD(P)-linked oxidoreductase superfamily protein
AT5G01790	-1.53308	3.04616e-07	2.13484e-05	unknown protein
AT5G02020	-2.26592	1.30795e-13	3.013e-11	unknown protein
AT5G02050	1.01421	0.000650768	0.0135871	Mitochondrial glycoprotein family protein
AT5G02200	-2.37944	7.38709e-06	0.000342954	far-red-elongated hypocotyl1-like (FHL)
AT5G02260	-2.05589	1.05476e-11	1.84214e-09	expansin A9 (EXPA9)
AT5G02490	1.41805	1.90589e-06	0.000105739	Heat shock protein 70 (Hsp 70) family protein
AT5G02540	-3.13056	4.23204e-20	2.32825e-17	NAD(P)-binding Rossmann-fold superfamily protein
AT5G02580	-2.22636	3.15264e-13	6.869e-11	Plant protein 1589 of unknown function
AT5G02750	-1.10197	0.000469366	0.0104437	RING/U-box superfamily protein
AT5G02760	1.33969	1.35522e-05	0.000568057	Protein phosphatase 2C family protein
AT5G03210	-2.05604	4.00109e-09	4.21282e-07	unknown protein
AT5G03350	1.38611	8.62152e-06	0.000387986	Legume lectin family protein
AT5G03390	1.37176	0.00278205	0.0414221	Protein of unknown function (DUF295)
AT5G04010	-2.3991	2.28484e-05	0.000889913	F-box family protein
AT5G04120	-2.63508	1.41388e-15	4.44482e-13	Phosphoglycerate mutase family protein
AT5G04770	-1.75403	7.90638e-09	7.98109e-07	cationic amino acid transporter 6 (CAT6)
AT5G05270	1.79935	1.30843e-07	9.89463e-06	Chalcone-flavanone isomerase family protein
AT5G05320	-1.04141	0.00153927	0.0264016	FAD/NAD(P)-binding oxidoreductase family protein
AT5G05960	1.27721	2.38823e-05	0.000923643	Bifunctional inhibitor/lipid-transfer protein/seed storage 2S albumin superfamily protein
AT5G05965	-2.67354	1.05861e-17	4.39543e-15	unknown protein
AT5G06720	1.26201	0.00275003	0.0410286	peroxidase 2 (PA2)
AT5G07010	-2.41036	3.37274e-14	8.24673e-12	sulfotransferase 2A (ST2A)
AT5G07030	-1.69353	1.70778e-08	1.56589e-06	Eukaryotic aspartyl protease family protein
AT5G07200	-2.4053	1.51639e-12	2.88494e-10	gibberellin 20-oxidase 3 (GA20OX3)
AT5G07240	1.8056	9.69647e-08	7.59361e-06	IQ-domain 24 (IQD24)
AT5G07330	-1.67149	2.98093e-08	2.63448e-06	unknown protein
AT5G07475	2.20143	0.00046807	0.0104255	Cupredoxin superfamily protein
AT5G07530	-2.25166	7.36629e-10	9.10689e-08	glycine rich protein 17 (GRP17)
AT5G07610	4.0972	0.00115461	0.020964	F-box family protein
AT5G07800	1.43406	2.21546e-05	0.000870597	Flavin-binding monooxygenase family protein
AT5G08030	28.6596	3.25922e-09	3.49866e-07	PLC-like phosphodiesterases superfamily protein
AT5G08050	1.00217	0.000664387	0.013819	FUNCTIONS IN: molecular_function unknown
AT5G08350	-1.20702	4.53283e-05	0.00157333	GRAM domain-containing protein / ABA-responsive protein-related
AT5G08490	3.63114	3.24802e-05	0.00119725	Tetratricopeptide repeat (TPR)-like superfamily protein
AT5G08640	1.99993	1.12031e-10	1.63437e-08	flavonol synthase 1 (FLS1)
AT5G09370	-27.7899	9.47066e-06	0.000417658	Bifunctional inhibitor/lipid-transfer protein/seed storage 2S albumin superfamily protein
AT5G09420	1.12145	0.00291113	0.0427367	translocon at the outer membrane of chloroplasts 64-V (TOC64-V)
AT5G09480	2.25877	0.000126152	0.0037064	hydroxyproline-rich glycoprotein family protein
AT5G09520	3.09428	2.08523e-05	0.000825316	hydroxyproline-rich glycoprotein family protein
AT5G09570	1.98496	8.67231e-06	0.000389149	Cox19-like CHCH family protein
AT5G10120	-1.18788	0.000434253	0.00979117	Ethylene insensitive 3 family protein
AT5G10130	1.32693	1.30943e-05	0.000550963	Pollen Ole e 1 allergen and extensin family protein
AT5G10180	-3.81756	3.96597e-31	6.71347e-28	slufate transporter 2
AT5G10430	-1.31354	8.33875e-06	0.000377577	arabinogalactan protein 4 (AGP4)
AT5G10890	2.21256	1.22707e-07	9.31133e-06	myosin heavy chain-related
AT5G11060	1.14496	0.000358214	0.00849284	KNOTTED1-like homeobox gene 4 (KNAT4)
AT5G11240	1.01588	0.00143394	0.0249449	transducin family protein / WD-40 repeat family protein
AT5G11260	-1.1599	0.000251898	0.00643818	ELONGATED HYPOCOTYL 5 (HY5)
AT5G11412	1.41511	0.000135698	0.00393161	RNA-binding (RRM/RBD/RNP motifs) family protein
AT5G11870	1.32218	0.000556818	0.0119428	Alkaline phytoceramidase (aPHC)
AT5G12020	1.27763	2.89145e-05	0.00107846	17.6 kDa class II heat shock protein (HSP17.6II)
AT5G12110	2.33651	9.88551e-13	1.94233e-10	Glutathione S-transferase, C-terminal-like
AT5G12860	1.16625	7.82333e-05	0.00249507	dicarboxylate transporter 1 (DiT1)
AT5G12940	-1.03301	0.000505895	0.0110672	Leucine-rich repeat (LRR) family protein
AT5G13210	1.4507	0.000325648	0.00795363	Uncharacterised conserved protein UCP015417, vWA
AT5G13250	-1.83338	0.00130439	0.0230187	RING finger protein
AT5G13580	1.5699	0.000279232	0.00694326	ABC-2 type transporter family protein
AT5G13630	1.50225	4.00983e-07	2.71509e-05	GENOMES UNCOUPLED 5 (GUN5)
AT5G13930	2.52586	1.2999e-15	4.14574e-13	TRANSPARENT TESTA 4 (TT4)
AT5G14060	1.04723	0.000456816	0.0102162	CARAB-AK-LYS
AT5G14200	1.61803	2.1771e-06	0.000118295	isopropylmalate dehydrogenase 1
AT5G14360	-1.11944	0.000505937	0.0110672	Ubiquitin-like superfamily protein
AT5G14470	-1.79977	3.25592e-07	2.25314e-05	GHMP kinase family protein
AT5G15150	-1.21037	4.33771e-05	0.00152485	homeobox 3 (HB-3)
AT5G15290	-1.19648	5.00576e-05	0.00170521	Uncharacterised protein family (UPF0497)
AT5G15380	26.9222	0.00161056	0.0272631	domains rearranged methylase 1 (DRM1)
AT5G15830	-1.79313	4.79096e-09	4.99668e-07	basic leucine-zipper 3 (bZIP3)
AT5G15960	-1.86879	7.93311e-07	4.9455e-05	KIN1
AT5G16110	-1.00385	0.000626392	0.0131908	unknown protein
AT5G16170	-2.2507	4.97091e-06	0.000242549	Core-2/I-branching beta-1,6-N-acetylglucosaminyltransferase family protein
AT5G16190	1.19269	0.000264056	0.00668679	cellulose synthase like A11 (CSLA11)
AT5G16460	-1.77927	0.000165873	0.00466182	Putative adipose-regulatory protein (Seipin)
AT5G16790	2.08017	0.00130439	0.0230187	THO7
AT5G17230	1.16405	8.60896e-05	0.0027364	PHYTOENE SYNTHASE (PSY)
AT5G17430	-27.121	0.000490287	0.0107677	BABY BOOM (BBM)
AT5G17850	-1.13663	0.000670779	0.0139125	Sodium/calcium exchanger family protein
AT5G18010	-1.32616	1.26647e-05	0.000537127	SAUR-like auxin-responsive protein family
AT5G18060	-1.38982	4.3074e-06	0.000215773	SAUR-like auxin-responsive protein family
AT5G18660	1.00358	0.000622515	0.0131217	PALE-GREEN AND CHLOROPHYLL B REDUCED 2 (PCB2)
AT5G19210	1.06229	0.00218052	0.0340799	P-loop containing nucleoside triphosphate hydrolases superfamily protein
AT5G19500	2.14061	4.0339e-05	0.00144341	Tryptophan/tyrosine permease
AT5G19750	1.13859	0.00012444	0.00366515	Peroxisomal membrane 22 kDa (Mpv17/PMP22) family protein
AT5G19875	-1.50888	6.45256e-06	0.000306685	unknown protein
AT5G19890	-1.64053	5.73515e-07	3.71391e-05	Peroxidase superfamily protein
AT5G19940	1.15622	8.62797e-05	0.0027364	Plastid-lipid associated protein PAP / fibrillin family protein
AT5G20160	1.02266	0.000484166	0.0107189	Ribosomal protein L7Ae/L30e/S12e/Gadd45 family protein
AT5G20420	-26.7833	0.00295179	0.0430465	chromatin remodeling 42 (CHR42)
AT5G20670	-1.3586	0.000135782	0.00393161	Protein of unknown function (DUF1677)
AT5G20740	1.15048	0.000100246	0.00306816	Plant invertase/pectin methylesterase inhibitor superfamily protein
AT5G21482	1.60967	8.53328e-06	0.000384802	cytokinin oxidase 7 (CKX7)
AT5G22100	1.01168	0.00102009	0.0192029	RNA cyclase family protein
AT5G22290	-1.18044	6.67206e-05	0.00218165	NAC domain containing protein 89 (NAC089)
AT5G22390	1.40721	2.97614e-05	0.0011063	Protein of unknown function (DUF3049)
AT5G22500	-1.58821	1.01589e-07	7.84409e-06	fatty acid reductase 1 (FAR1)
AT5G22555	1.52693	0.0018772	0.0306451	unknown protein
AT5G23010	27.1849	0.000490287	0.0107677	methylthioalkylmalate synthase 1 (MAM1)
AT5G23020	2.0888	6.54954e-08	5.26019e-06	2-isopropylmalate synthase 2 (IMS2)
AT5G23060	1.70155	1.3383e-08	1.28099e-06	calcium sensing receptor (CaS)
AT5G23350	-1.20879	7.5255e-05	0.00240523	GRAM domain-containing protein / ABA-responsive protein-related
AT5G23750	-1.04816	0.00037392	0.00877893	Remorin family protein
AT5G23790	-1.62022	1.66247e-06	9.45333e-05	galactinol synthase 5 (GolS5)
AT5G23830	1.04199	0.000398952	0.00923169	MD-2-related lipid recognition domain-containing protein
AT5G23870	-1.39041	2.26097e-05	0.000884728	Pectinacetylesterase family protein
AT5G24070	1.01766	0.00181482	0.0299818	Peroxidase superfamily protein
AT5G24190	2.71125	4.88317e-07	3.21734e-05	Lipase class 3-related protein
AT5G24420	27.2325	0.000273446	0.0068536	6-phosphogluconolactonase 5 (PGL5)
AT5G24580	-2.3381	1.79878e-13	4.03917e-11	Heavy metal transport/detoxification superfamily protein
AT5G24660	1.53742	0.00121334	0.0218322	RESPONSE TO LOW SULFUR 2 (LSU2)
AT5G24910	-1.27306	4.19732e-05	0.00148499	cytochrome P450, family 714, subfamily A, polypeptide 1 (CYP714A1)
AT5G25040	1.12137	0.000805675	0.0160015	Major facilitator superfamily protein
AT5G25090	1.61559	6.0882e-08	4.9621e-06	early nodulin-like protein 13 (ENODL13)
AT5G25110	-1.05756	0.00054367	0.0117294	CBL-interacting protein kinase 25 (CIPK25)
AT5G25280	-1.0245	0.000860677	0.0168506	serine-rich protein-related
AT5G25460	-1.00384	0.000609339	0.0128934	Protein of unknown function, DUF642
AT5G26146	-1.22026	0.000351376	0.00837744	other RNA
AT5G26170	3.18267	0.00290195	0.0426303	WRKY DNA-binding protein 50 (WRKY50)
AT5G26740	-1.0348	0.000445069	0.00998389	Protein of unknown function (DUF300)
AT5G26790	1.68044	3.96073e-06	0.000199808	unknown protein
AT5G26920	-1.97432	0.000279133	0.00694326	Cam-binding protein 60-like G (CBP60G)
AT5G26930	2.50832	0.000555247	0.0119207	GATA transcription factor 23 (GATA23)
AT5G27220	-2.50376	0.000555247	0.0119207	Frigida-like protein
AT5G27360	2.10684	1.76713e-05	0.000716047	SFP2
AT5G28080	-1.71397	4.66918e-07	3.12024e-05	WNK9
AT5G28773	27.282	0.000490287	0.0107677	pseudogene, similar to Putative retroelement, similar to putative reverse transcriptase
AT5G35420	1.96484	0.000437743	0.00982956	pseudogene, hypothetical protein, similar to unknown protein (gb|AAD56332.1)
AT5G35525	-1.08463	0.000247785	0.00636261	PLAC8 family protein
AT5G35660	-1.82519	1.432e-09	1.64988e-07	Glycine-rich protein family
AT5G35970	1.62002	7.31988e-07	4.60232e-05	P-loop containing nucleoside triphosphate hydrolases superfamily protein
AT5G36790	1.32326	0.00213736	0.0336203	Haloacid dehalogenase-like hydrolase (HAD) superfamily protein
AT5G36910	1.31953	4.97547e-05	0.0017001	thionin 2.2 (THI2.2)
AT5G37300	-2.67878	2.29646e-13	5.10463e-11	WSD1
AT5G37970	-3.21889	0.000437169	0.0098267	S-adenosyl-L-methionine-dependent methyltransferases superfamily protein
AT5G38000	2.25074	1.76615e-10	2.41402e-08	Zinc-binding dehydrogenase family protein
AT5G38005	-1.45946	0.000202934	0.00544606	other RNA
AT5G38020	3.01538	1.29302e-13	3.013e-11	S-adenosyl-L-methionine-dependent methyltransferases superfamily protein
AT5G38030	1.633	3.8577e-06	0.000195155	MATE efflux family protein
AT5G38280	-1.11024	0.0018125	0.0299754	PR5-like receptor kinase (PR5K)
AT5G38300	1.17218	0.000115394	0.00345492	unknown protein
AT5G38320	-3.24373	3.35848e-05	0.00123384	unknown protein
AT5G38430	1.08319	0.000224101	0.00589194	Ribulose bisphosphate carboxylase (small chain) family protein
AT5G38980	2.06028	3.87391e-10	5.04433e-08	unknown protein
AT5G39150	-1.58182	0.00185245	0.030399	RmlC-like cupins superfamily protein
AT5G39180	-27.4122	8.68372e-05	0.0027456	RmlC-like cupins superfamily protein
AT5G39865	-1.24355	0.000127426	0.00373884	Glutaredoxin family protein
AT5G39870	-2.43691	0.000322565	0.00788706	Protein of unknown function (DUF1216)
AT5G40040	2.59549	0.000690189	0.0141192	60S acidic ribosomal protein family
AT5G40320	1.86803	8.89111e-05	0.00278709	Cysteine/Histidine-rich C1 domain family protein
AT5G40420	-1.73245	6.67261e-09	6.89377e-07	oleosin 2 (OLEO2)
AT5G40450	-1.10771	0.000297814	0.00735544	unknown protein
AT5G40720	-1.43255	5.43314e-05	0.00181981	CONTAINS InterPro DOMAIN/s: Protein of unknown function DUF23 (InterPro:IPR008166)
AT5G40850	1.16303	8.92051e-05	0.00278842	urophorphyrin methylase 1 (UPM1)
AT5G41080	-1.08444	0.000248127	0.00636397	PLC-like phosphodiesterases superfamily protein
AT5G41740	3.33675	0.000244165	0.00629167	Disease resistance protein (TIR-NBS-LRR class) family
AT5G41761	-1.40694	4.32311e-06	0.000215773	unknown protein
AT5G41900	-1.05259	0.00171071	0.028628	alpha/beta-Hydrolases superfamily protein
AT5G42235	1.90059	0.00271964	0.0407132	Expressed protein
AT5G42290	-1.66724	4.49015e-06	0.000222546	transcription activator-related
AT5G42500	1.09067	0.000232374	0.00605879	Disease resistance-responsive (dirigent-like protein) family protein
AT5G42510	1.2615	0.000118062	0.00351817	Disease resistance-responsive (dirigent-like protein) family protein
AT5G42580	1.2522	0.00123989	0.0221829	cytochrome P450, family 705, subfamily A, polypeptide 12 (CYP705A12)
AT5G42700	1.285	0.00288986	0.0425794	AP2/B3-like transcriptional factor family protein
AT5G42825	-1.07684	0.000252514	0.00644644	unknown protein
AT5G42900	-1.62117	9.57001e-07	5.8991e-05	cold regulated gene 27
AT5G42930	-1.80327	2.6693e-08	2.38783e-06	alpha/beta-Hydrolases superfamily protein
AT5G43290	-2.14438	1.35528e-09	1.5697e-07	WRKY DNA-binding protein 49 (WRKY49)
AT5G43300	-1.44322	0.00281759	0.0417816	PLC-like phosphodiesterases superfamily protein
AT5G43470	1.00291	0.000798068	0.0158935	RECOGNITION OF PERONOSPORA PARASITICA 8 (RPP8)
AT5G43520	-1.01416	0.000872813	0.0170276	Cysteine/Histidine-rich C1 domain family protein
AT5G43630	1.46021	7.36664e-05	0.00236657	TZP
AT5G43690	1.385	0.00278205	0.0414221	P-loop containing nucleoside triphosphate hydrolases superfamily protein
AT5G44120	-3.27385	4.69625e-25	5.16728e-22	CRUCIFERINA (CRA1)
AT5G44130	-1.90346	2.37188e-10	3.22196e-08	FASCICLIN-like arabinogalactan protein 13 precursor (FLA13)
AT5G44255	-2.73572	2.55708e-09	2.81356e-07	gypsy-like retrotransposon family, has a 3.5e-09 P-value blast match to GB:AAD27547 polyprotein (Gypsy_Ty3-element) (Oryza sativa subsp. indica)
AT5G44260	-1.61521	6.98383e-08	5.58859e-06	Zinc finger C-x8-C-x5-C-x3-H type family protein
AT5G44550	2.41048	6.02608e-10	7.49208e-08	Uncharacterised protein family (UPF0497)
AT5G44920	-1.01034	0.000651639	0.0135924	Toll-Interleukin-Resistance (TIR) domain family protein
AT5G45210	-1.64124	0.000663763	0.013819	Disease resistance protein (TIR-NBS-LRR class) family
AT5G45310	-1.46897	2.82546e-06	0.000149824	unknown protein
AT5G45700	1.48821	1.70292e-06	9.60883e-05	Haloacid dehalogenase-like hydrolase (HAD) superfamily protein
AT5G45850	2.14456	2.26059e-08	2.03879e-06	Protein of unknown function (DUF688)
AT5G46110	1.33134	6.83036e-06	0.000319806	ACCLIMATION OF PHOTOSYNTHESIS TO ENVIRONMENT 2 (APE2)
AT5G46470	2.0487	0.000172102	0.00477588	RESISTANT TO P. SYRINGAE 6 (RPS6)
AT5G46690	1.63309	5.99094e-07	3.86618e-05	beta HLH protein 71 (bHLH071)
AT5G46900	-1.09692	0.000200163	0.00540465	Bifunctional inhibitor/lipid-transfer protein/seed storage 2S albumin superfamily protein
AT5G47240	-1.9294	2.98246e-09	3.21725e-07	nudix hydrolase homolog 8 (NUDT8)
AT5G47450	-1.14941	9.31429e-05	0.00289098	tonoplast intrinsic protein 2
AT5G47980	1.71156	2.57005e-08	2.30843e-06	HXXXD-type acyl-transferase family protein
AT5G47990	1.27765	1.55887e-05	0.000646034	cytochrome P450, family 705, subfamily A, polypeptide 5 (CYP705A5)
AT5G48010	1.6995	6.28668e-08	5.10497e-06	thalianol synthase 1 (THAS1)
AT5G48180	-1.10403	0.000171941	0.00477588	nitrile specifier protein 5 (NSP5)
AT5G48310	1.07877	0.00264845	0.039919	unknown protein
AT5G48412	-1.00466	0.000619575	0.0130723	unknown gene
AT5G48800	-1.20198	9.49387e-05	0.00294257	Phototropic-responsive NPH3 family protein
AT5G48880	1.55397	1.16165e-05	0.000496753	PEROXISOMAL-3-KETO-ACYL-COA THIOLASE 1 (PKT1)
AT5G48900	-1.06956	0.000286432	0.00709024	Pectin lyase-like superfamily protein
AT5G48920	1.24732	0.000845434	0.0166569	tracheary element differentiation-related 7 (TED7)
AT5G49138	-2.94703	0.000370513	0.00872967	other RNA
AT5G50175	-1.53392	7.90884e-06	0.000361083	unknown protein
AT5G50750	-1.15084	0.000149952	0.00427442	reversibly glycosylated polypeptide 4 (RGP4)
AT5G50800	2.05611	0.000143752	0.00411903	Nodulin MtN3 family protein
AT5G51210	-2.11069	3.81427e-12	6.88007e-10	oleosin3 (OLEO3)
AT5G51440	1.39129	4.32408e-06	0.000215773	HSP20-like chaperones superfamily protein
AT5G51470	4.97715	2.85999e-06	0.000150928	Auxin-responsive GH3 family protein
AT5G51540	1.03266	0.00192702	0.0312498	Zincin-like metalloproteases family protein
AT5G51600	1.19073	0.000141053	0.00405755	PLEIADE (PLE)
AT5G51670	-1.52997	1.80084e-06	0.000101095	Protein of unknown function (DUF668)
AT5G52170	1.64681	0.0017694	0.0294757	homeodomain GLABROUS 7 (HDG7)
AT5G52300	-1.87477	4.30137e-10	5.568e-08	LOW-TEMPERATURE-INDUCED 65 (LTI65)
AT5G52310	-2.64625	4.46391e-17	1.63721e-14	LOW-TEMPERATURE-INDUCED 78 (LTI78)
AT5G52570	1.07311	0.0010152	0.0191493	beta-carotene hydroxylase 2 (BETA-OHASE 2)
AT5G52860	1.7218	0.00070763	0.0144053	ABC-2 type transporter family protein
AT5G53190	-1.43265	0.00018138	0.00496448	Nodulin MtN3 family protein
AT5G53250	-1.56241	1.41302e-07	1.0505e-05	arabinogalactan protein 22 (AGP22)
AT5G53660	-2.10548	6.13403e-12	1.08859e-09	growth-regulating factor 7 (GRF7)
AT5G53980	-1.65734	2.96554e-08	2.63144e-06	homeobox protein 52 (HB52)
AT5G54080	-1.28217	2.15063e-05	0.000848151	homogentisate 1,2-dioxygenase (HGO)
AT5G54270	2.55212	9.58419e-17	3.45754e-14	light-harvesting chlorophyll B-binding protein 3 (LHCB3)
AT5G54370	1.2206	6.64774e-05	0.00217694	Late embryogenesis abundant (LEA) protein-related
AT5G54400	-1.96424	5.33675e-05	0.00179298	S-adenosyl-L-methionine-dependent methyltransferases superfamily protein
AT5G54470	-4.40527	2.57863e-13	5.67454e-11	B-box type zinc finger family protein
AT5G54585	-1.42639	4.20433e-05	0.00148508	unknown protein
AT5G54770	1.08781	0.000211454	0.00561988	THI1
AT5G55180	1.29348	1.28126e-05	0.000542221	O-Glycosyl hydrolases family 17 protein
AT5G55250	1.39038	0.000200097	0.00540465	IAA carboxylmethyltransferase 1 (IAMT1)
AT5G55450	2.58872	1.45681e-12	2.81216e-10	Bifunctional inhibitor/lipid-transfer protein/seed storage 2S albumin superfamily protein
AT5G55620	2.02407	1.39206e-10	1.96369e-08	unknown protein
AT5G55970	-1.61506	1.54969e-06	8.90404e-05	RING/U-box superfamily protein
AT5G56230	2.50994	0.000220741	0.00582449	prenylated RAB acceptor 1.G2 (PRA1.G2)
AT5G56490	1.49733	0.00125417	0.0223177	D-arabinono-1,4-lactone oxidase family protein
AT5G56550	-1.35157	6.21467e-06	0.000297305	OXIDATIVE STRESS 3 (OXS3)
AT5G56980	-1.02659	0.000756418	0.0152573	unknown protein
AT5G56990	-1.8516	0.00196662	0.0316125	BEST Arabidopsis thaliana protein match is: Cystatin/monellin superfamily protein (TAIR:AT5G56920.1)
AT5G57123	1.58901	3.36407e-07	2.31343e-05	unknown protein
AT5G57240	-1.03243	0.000473225	0.010519	OSBP(oxysterol binding protein)-related protein 4C (ORP4C)
AT5G57345	1.60298	7.68337e-08	6.10398e-06	unknown protein
AT5G57380	-2.12569	0.00020165	0.00542483	VERNALIZATION INSENSITIVE 3 (VIN3)
AT5G57480	-1.32499	1.10796e-05	0.000478073	P-loop containing nucleoside triphosphate hydrolases superfamily protein
AT5G57500	1.2642	0.000374199	0.00877893	Galactosyltransferase family protein
AT5G57760	-1.82232	1.17895e-09	1.39484e-07	unknown protein
AT5G58784	1.26612	0.00242631	0.0372598	Undecaprenyl pyrophosphate synthetase family protein
AT5G58860	3.39188	1.11259e-05	0.000478194	cytochrome P450, family 86, subfamily A, polypeptide 1 (CYP86A1)
AT5G59040	-30.1986	1.16714e-18	5.58349e-16	copper transporter 3 (COPT3)
AT5G59050	-1.61337	1.85838e-05	0.000747633	unknown protein
AT5G59130	2.58226	5.02688e-13	1.03385e-10	Subtilase family protein
AT5G59240	1.24453	0.000298172	0.00735602	Ribosomal protein S8e family protein
AT5G59570	-1.08503	0.000260225	0.00660518	Homeodomain-like superfamily protein
AT5G59930	-1.6408	0.000695961	0.0142072	Cysteine/Histidine-rich C1 domain family protein
AT5G59940	-2.2679	3.03504e-05	0.00112629	Cysteine/Histidine-rich C1 domain family protein
AT5G60250	1.93314	9.03542e-08	7.12665e-06	zinc finger (C3HC4-type RING finger) family protein
AT5G60520	1.23518	7.0271e-05	0.00227155	Late embryogenesis abundant (LEA) protein-related
AT5G60660	-1.1914	5.68426e-05	0.0018924	plasma membrane intrinsic protein 2
AT5G60680	-1.15002	0.000102373	0.00312025	Protein of unknown function, DUF584
AT5G60760	-1.47696	1.09305e-06	6.57203e-05	P-loop containing nucleoside triphosphate hydrolases superfamily protein
AT5G61030	1.07948	0.000422527	0.00958571	glycine-rich RNA-binding protein 3 (GR-RBP3)
AT5G61270	2.90336	7.66273e-06	0.000352774	phytochrome-interacting factor7 (PIF7)
AT5G61420	1.54945	0.00300593	0.0436912	myb domain protein 28 (MYB28)
AT5G61490	2.31023	0.00187587	0.0306451	Uncharacterised conserved protein (UCP012943)
AT5G61600	-1.05612	0.00135084	0.0237053	ethylene response factor 104 (ERF104)
AT5G62210	1.37117	0.000480795	0.0106634	Embryo-specific protein 3, (ATS3)
AT5G62360	2.0335	5.71795e-06	0.000276548	Plant invertase/pectin methylesterase inhibitor superfamily protein
AT5G62490	-1.21855	3.70891e-05	0.00134684	HVA22 homologue B (HVA22B)
AT5G62720	1.112	0.000256385	0.00652254	Integral membrane HPP family protein
AT5G62800	-2.17926	0.000224427	0.00589347	Protein with RING/U-box and TRAF-like domains
AT5G63350	-1.058	0.000568968	0.0121679	unknown protein
AT5G63650	-2.46835	7.84424e-16	2.57642e-13	SNF1-related protein kinase 2.5 (SNRK2.5)
AT5G64040	1.38862	2.64098e-06	0.00014072	PSAN
AT5G64060	2.22341	5.23345e-08	4.32959e-06	NAC domain containing protein 103 (NAC103)
AT5G64080	1.0664	0.000431013	0.00973002	Bifunctional inhibitor/lipid-transfer protein/seed storage 2S albumin superfamily protein
AT5G64120	-1.00867	0.000577948	0.0123239	Peroxidase superfamily protein
AT5G64530	1.27875	0.000249608	0.00638705	xylem NAC domain 1 (XND1)
AT5G64770	1.83772	1.01467e-06	6.18529e-05	root meristem growth factor 9 (RGF9)
AT5G64850	1.06412	0.000346151	0.00830688	FUNCTIONS IN: molecular_function unknown
AT5G65010	1.19801	5.86907e-05	0.00193926	asparagine synthetase 2 (ASN2)
AT5G65030	1.10503	0.000358532	0.00849284	unknown protein
AT5G65165	-1.15931	0.000372757	0.00876669	succinate dehydrogenase 2-3 (SDH2-3)
AT5G65320	2.28517	0.00281586	0.0417816	basic helix-loop-helix (bHLH) DNA-binding superfamily protein
AT5G65340	1.60687	0.000973338	0.0185128	Protein of unknown function, DUF617
AT5G65550	-1.17121	0.00216503	0.03391	UDP-Glycosyltransferase superfamily protein
AT5G65730	3.25414	6.44375e-22	4.29701e-19	xyloglucan endotransglucosylase/hydrolase 6 (XTH6)
AT5G65800	-2.55365	2.42185e-14	6.05629e-12	ACC synthase 5 (ACS5)
AT5G65850	1.67167	0.0017694	0.0294757	F-box and associated interaction domains-containing protein
AT5G66400	-1.92205	1.5848e-10	2.22039e-08	RESPONSIVE TO ABA 18 (RAB18)
AT5G66558	-1.15541	0.00184606	0.0303533	other RNA
AT5G66590	-1.94033	1.2754e-10	1.8225e-08	CAP (Cysteine-rich secretory proteins, Antigen 5, and Pathogenesis-related 1 protein) superfamily protein
AT5G66650	-1.85538	8.40312e-10	1.02165e-07	Protein of unknown function (DUF607)
AT5G66700	-4.58545	1.74289e-05	0.000708946	homeobox 53 (HB53)
AT5G66780	-1.20067	4.46197e-05	0.00155857	unknown protein
AT5G66985	1.40193	2.6378e-06	0.00014072	unknown protein
AT5G67020	-1.28149	0.000100625	0.00307549	unknown protein
AT5G67270	1.06208	0.000687964	0.0141192	end binding protein 1C (EB1C)
AT5G67620	1.12234	0.000423604	0.00960023	unknown protein
ATMG00670	1.32657	0.000736013	0.0149278	FUNCTIONS IN: molecular_function unknown
ATMG01320	1.83373	0.000358372	0.00849284	NADH dehydrogenase 2B (NAD2B)
