# Supplementary material for: A Quartet of PIF bHLH Factors Provides a Transcriptionally Centered Signaling Hub That Regulates Seedling Morphogenesis through Differential Expression-Patterning of Shared Target Genes in Arabidopsis
Source: PLoS Genet. 2013 Jan 31;9(1):e1003244. doi: 10.1371/journal.pgen.1003244 (PMC3561105; doi:10.1371/journal.pgen.1003244)
Supplement: Table S9 — Composite list of PIF3-regulated genes. (XLS) [file pgen.1003244.s016.xls]

## Sheet: Table_S9
Table S9. Composite list of PIF3-regulated genes.
Locus	pif3D/WTD	pifqD/pif145D	PIF3_regulation	Description
AT1G01680	down	down	Induced	plant U-box 54 (PUB54)
AT1G02340	×	down	Induced	LONG HYPOCOTYL IN FAR-RED (HFR1)
AT1G02800	×	down	Induced	cellulase 2 (CEL2)
AT1G03170	×	down	Induced	Protein of unknown function (DUF3049)
AT1G04220	×	down	Induced	3-ketoacyl-CoA synthase 2 (KCS2)
AT1G04660	×	up	Repressed	glycine-rich protein
AT1G04920	up	×	Repressed	sucrose phosphate synthase 3F (SPS3F)
AT1G05490	×	down	Induced	chromatin remodeling 31 (chr31)
AT1G06080	down	down	Induced	delta 9 desaturase 1 (ADS1)
AT1G06160	×	up	Repressed	octadecanoid-responsive Arabidopsis AP2/ERF 59 (ORA59)
AT1G06830	×	up	Repressed	Glutaredoxin family protein
AT1G09350	×	down	Induced	galactinol synthase 3 (GolS3)
AT1G09530	down	down	Induced	phytochrome interacting factor 3 (PIF3)
AT1G10070	×	down	Induced	branched-chain amino acid transaminase 2 (BCAT-2)
AT1G10550	×	down	Induced	xyloglucan:xyloglucosyl transferase 33 (XTH33)
AT1G10657	×	up	Repressed	Plant protein 1589 of unknown function
AT1G11112	×	up	Repressed	unknown protein
AT1G14350	×	down	Induced	FOUR LIPS (FLP)
AT1G14520	down	×	Induced	myo-inositol oxygenase 1 (MIOX1)
AT1G15820	up	×	Repressed	light harvesting complex photosystem II subunit 6 (LHCB6)
AT1G16490	×	down	Induced	myb domain protein 58 (MYB58)
AT1G17960	down	×	Induced	Threonyl-tRNA synthetase
AT1G19510	×	down	Induced	RAD-like 5 (RL5)
AT1G19940	×	down	Induced	glycosyl hydrolase 9B5 (GH9B5)
AT1G20790	×	down	Induced	F-box family protein
AT1G21520	down	×	Induced	unknown protein
AT1G21525	down	×	Induced	expressed protein
AT1G22275	×	up	Repressed	ZYP1b
AT1G22650	×	up	Repressed	Plant neutral invertase family protein
AT1G23130	up	up	Repressed	Polyketide cyclase/dehydrase and lipid transport superfamily protein
AT1G24070	×	up	Repressed	cellulose synthase-like A10 (CSLA10)
AT1G24580	up	×	Repressed	RING/U-box superfamily protein
AT1G26290	×	down	Induced	unknown protein
AT1G26761	×	up	Repressed	Arabinanase/levansucrase/invertase
AT1G27461	up	×	Repressed	unknown protein
AT1G28570	×	up	Repressed	SGNH hydrolase-type esterase superfamily protein
AT1G29910	up	up	Repressed	chlorophyll A/B binding protein 3 (CAB3)
AT1G29920	up	up	Repressed	chlorophyll A/B-binding protein 2 (CAB2)
AT1G29930	up	up	Repressed	chlorophyll A/B binding protein 1 (CAB1)
AT1G31580	×	up	Repressed	ECS1
AT1G32560	up	×	Repressed	Late embryogenesis abundant protein, group 1 protein
AT1G32900	up	up	Repressed	UDP-Glycosyltransferase superfamily protein
AT1G33440	×	down	Induced	Major facilitator superfamily protein
AT1G34245	×	up	Repressed	EPIDERMAL PATTERNING FACTOR 2 (EPF2)
AT1G35290	×	up	Repressed	Thioesterase superfamily protein
AT1G44542	×	down	Induced	Cyclase family protein
AT1G44830	×	down	Induced	Integrase-type DNA-binding superfamily protein
AT1G45201	up	up	Repressed	triacylglycerol lipase-like 1 (TLL1)
AT1G49130	×	down	Induced	B-box type zinc finger protein with CCT domain
AT1G49570	×	down	Induced	Peroxidase superfamily protein
AT1G51805	×	up	Repressed	Leucine-rich repeat protein kinase family protein
AT1G52400	×	up	Repressed	beta glucosidase 18 (BGLU18)
AT1G52690	up	×	Repressed	Late embryogenesis abundant protein (LEA) family protein
AT1G52830	×	down	Induced	indole-3-acetic acid 6 (IAA6)
AT1G53080	×	down	Induced	Legume lectin family protein
AT1G53480	×	up	Repressed	MTO 1 RESPONDING DOWN 1 (MRD1)
AT1G53490	×	up	Repressed	RING/U-box superfamily protein
AT1G53700	×	down	Induced	WAG 1 (WAG1)
AT1G54020	×	up	Repressed	GDSL-like Lipase/Acylhydrolase superfamily protein
AT1G54040	×	up	Repressed	epithiospecifier protein (ESP)
AT1G55670	up	×	Repressed	photosystem I subunit G (PSAG)
AT1G56430	×	up	Repressed	nicotianamine synthase 4 (NAS4)
AT1G57750	×	up	Repressed	cytochrome P450, family 96, subfamily A, polypeptide 15 (CYP96A15)
AT1G57980	×	up	Repressed	Nucleotide-sugar transporter family protein
AT1G58410	×	down	Induced	Disease resistance protein (CC-NBS-LRR class) family
AT1G60060	×	down	Induced	Serine/threonine-protein kinase WNK (With No Lysine)-related
AT1G60590	×	up	Repressed	Pectin lyase-like superfamily protein
AT1G62975	up	×	Repressed	basic helix-loop-helix (bHLH) DNA-binding superfamily protein
AT1G65090	up	×	Repressed	unknown protein
AT1G65875	×	down	Induced	pseudogene, similar to EST AU070346(S12172) corresponds to a region of the predicted gene.~similar to AMP-binding protein. (X94625), blastp match of 57% identity and 4.5e-137 P-value to GP|6063549|dbj|BAA85409.1||AP000615 EST AU070346(S12172) corresponds to a region of the predicted gene.~similar to AMP-binding protein. (X94625) {Oryza sativa (japonica cultivar-group)}
AT1G66780	×	down	Induced	MATE efflux family protein
AT1G66970	×	up	Repressed	SHV3-like 2 (SVL2)
AT1G67265	×	down	Induced	ROTUNDIFOLIA like 21 (RTFL21)
AT1G70440	down	×	Induced	similar to RCD one 3 (SRO3)
AT1G70820	×	up	Repressed	phosphoglucomutase, putative / glucose phosphomutase, putative
AT1G70840	down	×	Induced	MLP-like protein 31 (MLP31)
AT1G70985	×	down	Induced	hydroxyproline-rich glycoprotein family protein
AT1G71890	×	up	Repressed	SUC5
AT1G72290	×	down	Induced	Kunitz family trypsin and protease inhibitor protein
AT1G72520	×	down	Induced	PLAT/LH2 domain-containing lipoxygenase family protein
AT1G72610	×	up	Repressed	germin-like protein 1 (GER1)
AT1G73870	×	up	Repressed	B-box type zinc finger protein with CCT domain
AT1G74650	×	down	Induced	myb domain protein 31 (MYB31)
AT1G74670	×	up	Repressed	Gibberellin-regulated family protein
AT1G75900	×	down	Induced	GDSL-like Lipase/Acylhydrolase superfamily protein
AT1G76100	×	up	Repressed	plastocyanin 1 (PETE1)
AT1G76610	×	up	Repressed	Protein of unknown function, DUF617
AT1G78460	×	up	Repressed	SOUL heme-binding family protein
AT1G78490	×	up	Repressed	cytochrome P450, family 708, subfamily A, polypeptide 3 (CYP708A3)
AT1G80090	up	×	Repressed	Cystathionine beta-synthase (CBS) family protein
AT2G01422	down	×	Induced	unknown gene
AT2G01890	×	up	Repressed	purple acid phosphatase 8 (PAP8)
AT2G05070	up	up	Repressed	photosystem II light harvesting complex gene 2.2 (LHCB2.2)
AT2G05100	up	up	Repressed	photosystem II light harvesting complex gene 2.1 (LHCB2.1)
AT2G05370	×	down	Induced	BEST Arabidopsis thaliana protein match is: RNA-dependent RNA polymerase 6 (TAIR:AT3G49500.1)
AT2G05914	×	up	Repressed	Potential natural antisense gene, locus overlaps with AT2G05915
AT2G13610	×	up	Repressed	ABC-2 type transporter family protein
AT2G14900	×	down	Induced	Gibberellin-regulated family protein
AT2G16850	×	up	Repressed	plasma membrane intrinsic protein 2
AT2G17680	×	down	Induced	Arabidopsis protein of unknown function (DUF241)
AT2G17850	×	up	Repressed	Rhodanese/Cell cycle control phosphatase superfamily protein
AT2G18340	up	×	Repressed	late embryogenesis abundant domain-containing protein / LEA domain-containing protein
AT2G18540	up	×	Repressed	RmlC-like cupins superfamily protein
AT2G18969	×	down	Induced	BEST Arabidopsis thaliana protein match is: sequence-specific DNA binding transcription factors
AT2G21140	×	down	Induced	proline-rich protein 2 (PRP2)
AT2G21490	up	×	Repressed	dehydrin LEA (LEA)
AT2G21910	×	down	Induced	cytochrome P450, family 96, subfamily A, polypeptide 5 (CYP96A5)
AT2G25130	×	down	Induced	ARM repeat superfamily protein
AT2G27402	×	up	Repressed	BEST Arabidopsis thaliana protein match is: plastid transcriptionally active 18 (TAIR:AT2G32180.1)
AT2G28630	×	down	Induced	3-ketoacyl-CoA synthase 12 (KCS12)
AT2G30520	×	up	Repressed	ROOT PHOTOTROPISM 2 (RPT2)
AT2G30540	up	×	Repressed	Thioredoxin superfamily protein
AT2G31380	×	up	Repressed	salt tolerance homologue (STH)
AT2G31980	×	down	Induced	PHYTOCYSTATIN 2 (CYS2)
AT2G31985	×	up	Repressed	Protein of unknown function (DUF1264)
AT2G32430	×	down	Induced	Galactosyltransferase family protein
AT2G32550	×	up	Repressed	Cell differentiation, Rcd1-like protein
AT2G32880	×	up	Repressed	TRAF-like family protein
AT2G32990	×	down	Induced	glycosyl hydrolase 9B8 (GH9B8)
AT2G33205	×	down	Induced	Serinc-domain containing serine and sphingolipid biosynthesis protein
AT2G33380	×	down	Induced	RESPONSIVE TO DESSICATION 20 (RD20)
AT2G33880	up	×	Repressed	homeobox-3 (HB-3)
AT2G34315	×	down	Induced	Avirulence induced gene (AIG1) family protein
AT2G34420	up	up	Repressed	photosystem II light harvesting complex gene B1B2 (LHB1B2)
AT2G34430	up	up	Repressed	light-harvesting chlorophyll-protein complex II subunit B1 (LHB1B1)
AT2G34490	×	up	Repressed	cytochrome P450, family 710, subfamily A, polypeptide 2 (CYP710A2)
AT2G34620	×	up	Repressed	Mitochondrial transcription termination factor family protein
AT2G35760	×	down	Induced	Uncharacterised protein family (UPF0497)
AT2G36590	×	up	Repressed	proline transporter 3 (ProT3)
AT2G36640	up	×	Repressed	embryonic cell protein 63 (ECP63)
AT2G37670	×	down	Induced	Transducin/WD40 repeat-like superfamily protein
AT2G38530	×	down	Induced	lipid transfer protein 2 (LTP2)
AT2G39250	×	up	Repressed	SCHNARCHZAPFEN (SNZ)
AT2G39350	×	down	Induced	ABC-2 type transporter family protein
AT2G40435	×	up	Repressed	BEST Arabidopsis thaliana protein match is: transcription regulators (TAIR:AT3G56220.1)
AT2G40670	×	up	Repressed	response regulator 16 (RR16)
AT2G43550	×	up	Repressed	Scorpion toxin-like knottin superfamily protein
AT2G46660	×	down	Induced	cytochrome P450, family 78, subfamily A, polypeptide 6 (CYP78A6)
AT2G46970	×	down	Induced	phytochrome interacting factor 3-like 1 (PIL1)
AT2G47560	×	up	Repressed	RING/U-box superfamily protein
AT2G47750	×	up	Repressed	putative indole-3-acetic acid-amido synthetase GH3.9 (GH3.9)
AT2G47770	up	×	Repressed	TSPO(outer membrane tryptophan-rich sensory protein)-related (TSPO)
AT3G01500	up	×	Repressed	carbonic anhydrase 1 (CA1)
AT3G01570	up	×	Repressed	Oleosin family protein
AT3G01920	down	×	Induced	DHBP synthase RibB-like alpha/beta domain
AT3G03341	up	×	Repressed	unknown protein
AT3G05730	up	up	Repressed	LOCATED IN: endomembrane system
AT3G10290	×	down	Induced	Nucleotide-sugar transporter family protein
AT3G10520	×	up	Repressed	haemoglobin 2 (HB2)
AT3G10570	×	up	Repressed	cytochrome P450, family 77, subfamily A, polypeptide 6 (CYP77A6)
AT3G10870	×	up	Repressed	methyl esterase 17 (MES17)
AT3G12820	×	down	Induced	myb domain protein 10 (MYB10)
AT3G14210	×	up	Repressed	epithiospecifier modifier 1 (ESM1)
AT3G14760	×	up	Repressed	unknown protein
AT3G14770	×	up	Repressed	Nodulin MtN3 family protein
AT3G15570	×	up	Repressed	Phototropic-responsive NPH3 family protein
AT3G15620	×	down	Induced	UV REPAIR DEFECTIVE 3 (UVR3)
AT3G15670	up	×	Repressed	Late embryogenesis abundant protein (LEA) family protein
AT3G16360	×	up	Repressed	HPT phosphotransmitter 4 (AHP4)
AT3G16660	up	up	Repressed	Pollen Ole e 1 allergen and extensin family protein
AT3G16670	×	up	Repressed	Pollen Ole e 1 allergen and extensin family protein
AT3G17110	×	down	Induced	pseudogene, glycine-rich protein
AT3G17520	up	×	Repressed	Late embryogenesis abundant protein (LEA) family protein
AT3G17580	×	down	Induced	unknown protein
AT3G17609	×	down	Induced	HY5-homolog (HYH)
AT3G18530	×	down	Induced	ARM repeat superfamily protein
AT3G18950	×	down	Induced	Transducin/WD40 repeat-like superfamily protein
AT3G19300	down	×	Induced	Protein kinase superfamily protein
AT3G19710	up	×	Repressed	branched-chain aminotransferase4 (BCAT4)
AT3G19850	up	up	Repressed	Phototropic-responsive NPH3 family protein
AT3G20470	×	down	Induced	glycine-rich protein 5 (GRP5)
AT3G20600	×	up	Repressed	non race-specific disease resistance 1 (NDR1)
AT3G20810	×	down	Induced	2-oxoglutarate (2OG) and Fe(II)-dependent oxygenase superfamily protein
AT3G21330	×	down	Induced	basic helix-loop-helix (bHLH) DNA-binding superfamily protein
AT3G21670	×	down	Induced	Major facilitator superfamily protein
AT3G21950	×	up	Repressed	S-adenosyl-L-methionine-dependent methyltransferases superfamily protein
AT3G22090	×	up	Repressed	unknown protein
AT3G22840	×	down	Induced	EARLY LIGHT-INDUCABLE PROTEIN (ELIP1)
AT3G25770	×	up	Repressed	allene oxide cyclase 2 (AOC2)
AT3G27690	up	up	Repressed	photosystem II light harvesting complex gene 2.3 (LHCB2.3)
AT3G28210	down	×	Induced	PMZ
AT3G28580	up	×	Repressed	P-loop containing nucleoside triphosphate hydrolases superfamily protein
AT3G28857	×	down	Induced	basic helix-loop-helix (bHLH) DNA-binding family protein
AT3G29639	×	down	Induced	BEST Arabidopsis thaliana protein match is: SPOC domain / Transcription elongation factor S-II protein (TAIR:AT5G11430.1)
AT3G30720	×	up	Repressed	QUA-QUINE STARCH (QQS)
AT3G43715	×	up	Repressed	pseudogene, hypothetical protein, similar to putative non-LTR retroelement reverse transcriptase
AT3G45140	×	up	Repressed	lipoxygenase 2 (LOX2)
AT3G47250	×	up	Repressed	Plant protein of unknown function (DUF247)
AT3G48260	×	down	Induced	with no lysine (K) kinase 3 (WNK3)
AT3G48720	up	×	Repressed	HXXXD-type acyl-transferase family protein
AT3G49360	×	down	Induced	6-phosphogluconolactonase 2 (PGL2)
AT3G50770	down	down	Induced	calmodulin-like 41 (CML41)
AT3G51895	×	down	Induced	sulfate transporter 3
AT3G52540	×	up	Repressed	ovate family protein 18 (OFP18)
AT3G54830	×	down	Induced	Transmembrane amino acid transporter family protein
AT3G54890	up	up	Repressed	photosystem I light harvesting complex gene 1 (LHCA1)
AT3G54940	up	×	Repressed	Papain family cysteine protease
AT3G56080	×	up	Repressed	S-adenosyl-L-methionine-dependent methyltransferases superfamily protein
AT3G56220	×	up	Repressed	transcription regulators
AT4G00950	×	up	Repressed	maternal effect embryo arrest 47 (MEE47)
AT4G01515	×	down	Induced	non-LTR retrotransposon family (LINE), has a 1.1e-18 P-value blast match to GB:AAB41224 ORF2 (LINE-element) (Rattus norvegicus)
AT4G01525	up	×	Repressed	transposable element gene
AT4G02290	×	down	Induced	glycosyl hydrolase 9B13 (GH9B13)
AT4G04840	×	up	Repressed	methionine sulfoxide reductase B6 (MSRB6)
AT4G05180	up	×	Repressed	photosystem II subunit Q-2 (PSBQ-2)
AT4G09610	down	×	Induced	GAST1 protein homolog 2 (GASA2)
AT4G10240	×	down	Induced	B-box zinc finger family protein
AT4G10250	×	down	Induced	ATHSP22.0
AT4G11050	×	down	Induced	glycosyl hydrolase 9C3 (GH9C3)
AT4G11320	×	up	Repressed	Papain family cysteine protease
AT4G11610	×	down	Induced	C2 calcium/lipid-binding plant phosphoribosyltransferase family protein
AT4G12520	×	down	Induced	Bifunctional inhibitor/lipid-transfer protein/seed storage 2S albumin superfamily protein
AT4G13210	×	down	Induced	Pectin lyase-like superfamily protein
AT4G13495	×	up	Repressed	other RNA
AT4G13540	×	down	Induced	unknown protein
AT4G13770	up	×	Repressed	cytochrome P450, family 83, subfamily A, polypeptide 1 (CYP83A1)
AT4G14010	×	down	Induced	ralf-like 32 (RALFL32)
AT4G14130	×	down	Induced	xyloglucan endotransglucosylase/hydrolase 15 (XTH15)
AT4G14690	down	down	Induced	EARLY LIGHT-INDUCIBLE PROTEIN 2 (ELIP2)
AT4G15360	×	up	Repressed	cytochrome P450, family 705, subfamily A, polypeptide 3 (CYP705A3)
AT4G16160	up	×	Repressed	ATOEP16-2
AT4G16670	×	down	Induced	CONTAINS InterPro DOMAIN/s: Pleckstrin-like, plant (InterPro:IPR013666), Protein of unknown function DUF828 (InterPro:IPR008546), Pleckstrin homology (InterPro:IPR001849)
AT4G18740	×	up	Repressed	Rho termination factor
AT4G19530	×	up	Repressed	disease resistance protein (TIR-NBS-LRR class) family
AT4G21020	up	×	Repressed	Late embryogenesis abundant protein (LEA) family protein
AT4G22690	×	up	Repressed	cytochrome P450, family 706, subfamily A, polypeptide 1 (CYP706A1)
AT4G23300	up	up	Repressed	cysteine-rich RLK (RECEPTOR-like protein kinase) 22 (CRK22)
AT4G24265	×	up	Repressed	unknown protein
AT4G25260	×	down	Induced	Plant invertase/pectin methylesterase inhibitor superfamily protein
AT4G25790	×	up	Repressed	CAP (Cysteine-rich secretory proteins, Antigen 5, and Pathogenesis-related 1 protein) superfamily protein
AT4G26150	×	up	Repressed	cytokinin-responsive gata factor 1 (CGA1)
AT4G26390	×	down	Induced	Pyruvate kinase family protein
AT4G27570	×	up	Repressed	UDP-Glycosyltransferase superfamily protein
AT4G27790	×	down	Induced	Calcium-binding EF hand family protein
AT4G28560	×	down	Induced	ROP-interactive CRIB motif-containing protein 7 (RIC7)
AT4G28780	×	up	Repressed	GDSL-like Lipase/Acylhydrolase superfamily protein
AT4G30180	×	down	Induced	sequence-specific DNA binding transcription factors
AT4G30230	×	up	Repressed	unknown protein
AT4G31370	×	down	Induced	FASCICLIN-like arabinogalactan protein 5 precursor (FLA5)
AT4G31380	down	down	Induced	FPF1-like protein 1 (FLP1)
AT4G31610	×	down	Induced	REPRODUCTIVE MERISTEM 1 (REM1)
AT4G33467	up	×	Repressed	unknown protein
AT4G33560	×	up	Repressed	Wound-responsive family protein
AT4G34419	up	×	Repressed	unknown protein
AT4G35720	×	down	Induced	Arabidopsis protein of unknown function (DUF241)
AT4G36220	×	up	Repressed	ferulic acid 5-hydroxylase 1 (FAH1)
AT4G36600	up	×	Repressed	Late embryogenesis abundant (LEA) protein
AT4G36700	up	×	Repressed	RmlC-like cupins superfamily protein
AT4G36830	×	up	Repressed	HOS3-1
AT4G37150	×	up	Repressed	methyl esterase 9 (MES9)
AT4G37410	×	up	Repressed	cytochrome P450, family 81, subfamily F, polypeptide 4 (CYP81F4)
AT4G37740	×	down	Induced	growth-regulating factor 2 (GRF2)
AT4G37770	×	down	Induced	1-amino-cyclopropane-1-carboxylate synthase 8 (ACS8)
AT4G37800	up	up	Repressed	xyloglucan endotransglucosylase/hydrolase 7 (XTH7)
AT4G38400	×	down	Induced	expansin-like A2 (EXLA2)
AT4G38840	×	up	Repressed	SAUR-like auxin-responsive protein family
AT4G39510	up	up	Repressed	cytochrome P450, family 96, subfamily A, polypeptide 12 (CYP96A12)
AT5G01330	×	down	Induced	pyruvate decarboxylase-3 (PDC3)
AT5G01670	up	×	Repressed	NAD(P)-linked oxidoreductase superfamily protein
AT5G01790	×	down	Induced	unknown protein
AT5G02260	×	down	Induced	expansin A9 (EXPA9)
AT5G02580	×	down	Induced	Plant protein 1589 of unknown function
AT5G03390	×	up	Repressed	Protein of unknown function (DUF295)
AT5G04000	up	×	Repressed	unknown protein
AT5G04120	×	down	Induced	Phosphoglycerate mutase family protein
AT5G04970	×	down	Induced	Plant invertase/pectin methylesterase inhibitor superfamily
AT5G06640	×	up	Repressed	Proline-rich extensin-like family protein
AT5G06760	up	×	Repressed	Late Embryogenesis Abundant 4-5 (LEA4-5)
AT5G07330	up	×	Repressed	unknown protein
AT5G08030	×	up	Repressed	PLC-like phosphodiesterases superfamily protein
AT5G09370	×	down	Induced	Bifunctional inhibitor/lipid-transfer protein/seed storage 2S albumin superfamily protein
AT5G09480	×	up	Repressed	hydroxyproline-rich glycoprotein family protein
AT5G09570	×	up	Repressed	Cox19-like CHCH family protein
AT5G10180	×	down	Induced	slufate transporter 2
AT5G11260	×	down	Induced	ELONGATED HYPOCOTYL 5 (HY5)
AT5G13320	down	down	Induced	AVRPPHB SUSCEPTIBLE 3 (PBS3)
AT5G14200	up	×	Repressed	isopropylmalate dehydrogenase 1
AT5G14360	×	down	Induced	Ubiquitin-like superfamily protein
AT5G14920	×	down	Induced	Gibberellin-regulated family protein
AT5G16030	up	×	Repressed	unknown protein
AT5G17150	×	up	Repressed	Cystatin/monellin superfamily protein
AT5G17850	×	down	Induced	Sodium/calcium exchanger family protein
AT5G18000	down	×	Induced	VERDANDI (VDD)
AT5G19600	down	×	Induced	sulfate transporter 3
AT5G21482	×	up	Repressed	cytokinin oxidase 7 (CKX7)
AT5G22500	×	down	Induced	fatty acid reductase 1 (FAR1)
AT5G24130	up	×	Repressed	unknown protein
AT5G24580	×	down	Induced	Heavy metal transport/detoxification superfamily protein
AT5G25090	×	up	Repressed	early nodulin-like protein 13 (ENODL13)
AT5G25140	×	down	Induced	cytochrome P450, family 71, subfamily B, polypeptide 13 (CYP71B13)
AT5G26146	×	down	Induced	other RNA
AT5G26790	×	up	Repressed	unknown protein
AT5G28080	×	down	Induced	WNK9
AT5G28773	×	up	Repressed	pseudogene, similar to Putative retroelement, similar to putative reverse transcriptase
AT5G33370	×	down	Induced	GDSL-like Lipase/Acylhydrolase superfamily protein
AT5G35940	×	up	Repressed	Mannose-binding lectin superfamily protein
AT5G36270	×	up	Repressed	similar to DHAR2, glutathione dehydrogenase (ascorbate) [Arabidopsis thaliana] (TAIR:AT1G75270.1)
AT5G36910	up	up	Repressed	thionin 2.2 (THI2.2)
AT5G37300	×	down	Induced	WSD1
AT5G37940	×	down	Induced	Zinc-binding dehydrogenase family protein
AT5G37970	×	down	Induced	S-adenosyl-L-methionine-dependent methyltransferases superfamily protein
AT5G38000	×	up	Repressed	Zinc-binding dehydrogenase family protein
AT5G38020	×	up	Repressed	S-adenosyl-L-methionine-dependent methyltransferases superfamily protein
AT5G38320	×	down	Induced	unknown protein
AT5G38980	×	up	Repressed	unknown protein
AT5G39150	×	down	Induced	RmlC-like cupins superfamily protein
AT5G39180	×	down	Induced	RmlC-like cupins superfamily protein
AT5G42930	×	down	Induced	alpha/beta-Hydrolases superfamily protein
AT5G43290	×	down	Induced	WRKY DNA-binding protein 49 (WRKY49)
AT5G44130	×	down	Induced	FASCICLIN-like arabinogalactan protein 13 precursor (FLA13)
AT5G44255	×	down	Induced	gypsy-like retrotransposon family, has a 3.5e-09 P-value blast match to GB:AAD27547 polyprotein (Gypsy_Ty3-element) (Oryza sativa subsp. indica)
AT5G44260	×	down	Induced	Zinc finger C-x8-C-x5-C-x3-H type family protein
AT5G44350	×	down	Induced	ethylene-responsive nuclear protein -related
AT5G44550	×	up	Repressed	Uncharacterised protein family (UPF0497)
AT5G45700	×	up	Repressed	Haloacid dehalogenase-like hydrolase (HAD) superfamily protein
AT5G46690	×	up	Repressed	beta HLH protein 71 (bHLH071)
AT5G46900	×	down	Induced	Bifunctional inhibitor/lipid-transfer protein/seed storage 2S albumin superfamily protein
AT5G50360	up	×	Repressed	unknown protein
AT5G51210	×	down	Induced	oleosin3 (OLEO3)
AT5G52300	up	×	Repressed	LOW-TEMPERATURE-INDUCED 65 (LTI65)
AT5G52310	×	down	Induced	LOW-TEMPERATURE-INDUCED 78 (LTI78)
AT5G52860	×	up	Repressed	ABC-2 type transporter family protein
AT5G53250	×	down	Induced	arabinogalactan protein 22 (AGP22)
AT5G53660	×	down	Induced	growth-regulating factor 7 (GRF7)
AT5G54030	×	down	Induced	Cysteine/Histidine-rich C1 domain family protein
AT5G54190	×	down	Induced	protochlorophyllide oxidoreductase A (PORA)
AT5G54270	×	up	Repressed	light-harvesting chlorophyll B-binding protein 3 (LHCB3)
AT5G54470	×	down	Induced	B-box type zinc finger family protein
AT5G54770	×	up	Repressed	THI1
AT5G55450	up	up	Repressed	Bifunctional inhibitor/lipid-transfer protein/seed storage 2S albumin superfamily protein
AT5G57760	×	down	Induced	unknown protein
AT5G59040	down	down	Induced	copper transporter 3 (COPT3)
AT5G59130	×	up	Repressed	Subtilase family protein
AT5G60880	×	up	Repressed	BREAKING OF ASYMMETRY IN THE STOMATAL LINEAGE (BASL)
AT5G61270	×	up	Repressed	phytochrome-interacting factor7 (PIF7)
AT5G61520	×	up	Repressed	Major facilitator superfamily protein
AT5G62330	up	×	Repressed	BEST Arabidopsis thaliana protein match is: Plant invertase/pectin methylesterase inhibitor superfamily protein (TAIR:AT5G62340.1)
AT5G62360	×	up	Repressed	Plant invertase/pectin methylesterase inhibitor superfamily protein
AT5G62490	up	×	Repressed	HVA22 homologue B (HVA22B)
AT5G63650	×	down	Induced	SNF1-related protein kinase 2.5 (SNRK2.5)
AT5G64770	×	up	Repressed	root meristem growth factor 9 (RGF9)
AT5G65730	×	up	Repressed	xyloglucan endotransglucosylase/hydrolase 6 (XTH6)
AT5G65800	×	down	Induced	ACC synthase 5 (ACS5)
AT5G66780	up	×	Repressed	unknown protein
AT5G66985	×	up	Repressed	unknown protein
