# Supplementary material for: A Quartet of PIF bHLH Factors Provides a Transcriptionally Centered Signaling Hub That Regulates Seedling Morphogenesis through Differential Expression-Patterning of Shared Target Genes in Arabidopsis
Source: PLoS Genet. 2013 Jan 31;9(1):e1003244. doi: 10.1371/journal.pgen.1003244 (PMC3561105; doi:10.1371/journal.pgen.1003244)
Supplement: Table S10 — Composite list of PIF1/4/5-trio-regulated genes. (XLS) [file pgen.1003244.s017.xls]

## Sheet: Table_S10
Table S10. Composite list of PIF1/4/5-trio-regulated genes.
Locus	pif145/WT	pifq/pif3	PIF1/4/5_regulation	Description
AT1G01120	×	down	Induced	3-ketoacyl-CoA synthase 1 (KCS1)
AT1G01390	×	down	Induced	UDP-Glycosyltransferase superfamily protein
AT1G01470	×	down	Induced	LATE EMBRYOGENESIS ABUNDANT 14 (LEA14)
AT1G01520	×	down	Induced	Homeodomain-like superfamily protein
AT1G01600	×	down	Induced	cytochrome P450, family 86, subfamily A, polypeptide 4 (CYP86A4)
AT1G01620	×	down	Induced	plasma membrane intrinsic protein 1C (PIP1C)
AT1G01780	×	down	Induced	GATA type zinc finger transcription factor family protein
AT1G02190	×	down	Induced	Fatty acid hydroxylase superfamily
AT1G02205	×	down	Induced	ECERIFERUM 1 (CER1)
AT1G02340	down	down	Induced	LONG HYPOCOTYL IN FAR-RED (HFR1)
AT1G02400	×	down	Induced	gibberellin 2-oxidase 6 (GA2OX6)
AT1G02610	×	down	Induced	RING/FYVE/PHD zinc finger superfamily protein
AT1G02700	×	down	Induced	unknown protein
AT1G02730	×	up	Repressed	cellulose synthase-like D5 (CSLD5)
AT1G02800	×	down	Induced	cellulase 2 (CEL2)
AT1G02820	×	up	Repressed	Late embryogenesis abundant 3 (LEA3) family protein
AT1G03090	down	down	Induced	MCCA
AT1G03106	down	down	Induced	unknown protein
AT1G03120	×	down	Induced	responsive to abscisic acid 28 (RAB28)
AT1G03130	up	up	Repressed	photosystem I subunit D-2 (PSAD-2)
AT1G03170	down	down	Induced	Protein of unknown function (DUF3049)
AT1G03780	×	up	Repressed	targeting protein for XKLP2 (TPX2)
AT1G03790	down	down	Induced	SOMNUS (SOM)
AT1G03800	down	down	Induced	ERF domain protein 10 (ERF10)
AT1G03880	down	×	Induced	cruciferin 2 (CRU2)
AT1G04220	×	down	Induced	3-ketoacyl-CoA synthase 2 (KCS2)
AT1G04240	×	down	Induced	SHORT HYPOCOTYL 2 (SHY2)
AT1G04310	×	down	Induced	ethylene response sensor 2 (ERS2)
AT1G04350	up	×	Repressed	2-oxoglutarate (2OG) and Fe(II)-dependent oxygenase superfamily protein
AT1G04635	×	up	Repressed	EMBRYO DEFECTIVE 1687 (EMB1687)
AT1G04660	×	up	Repressed	glycine-rich protein
AT1G04800	up	up	Repressed	glycine-rich protein
AT1G05440	×	up	Repressed	C-8 sterol isomerases
AT1G05490	×	down	Induced	chromatin remodeling 31 (chr31)
AT1G05510	down	×	Induced	FUNCTIONS IN: molecular_function unknown
AT1G05560	×	down	Induced	UDP-glucosyltransferase 75B1 (UGT75B1)
AT1G05650	×	up	Repressed	Pectin lyase-like superfamily protein
AT1G05675	down	×	Induced	UDP-Glycosyltransferase superfamily protein
AT1G05835	×	down	Induced	PHD finger protein
AT1G05990	×	up	Repressed	EF hand calcium-binding protein family
AT1G06160	×	up	Repressed	octadecanoid-responsive Arabidopsis AP2/ERF 59 (ORA59)
AT1G06320	×	down	Induced	unknown protein
AT1G06570	down	down	Induced	phytoene desaturation 1 (PDS1)
AT1G06680	up	up	Repressed	photosystem II subunit P-1 (PSBP-1)
AT1G06830	up	up	Repressed	Glutaredoxin family protein
AT1G06980	×	down	Induced	unknown protein
AT1G07150	×	down	Induced	mitogen-activated protein kinase kinase kinase 13 (MAPKKK13)
AT1G07645	×	down	Induced	dessication-induced 1VOC superfamily protein (DSI-1VOC)
AT1G07880	×	up	Repressed	ATMPK13
AT1G07985	×	down	Induced	Expressed protein
AT1G08090	down	down	Induced	nitrate transporter 2:1 (NRT2:1)
AT1G08380	up	up	Repressed	photosystem I subunit O (PSAO)
AT1G08500	×	down	Induced	early nodulin-like protein 18 (ENODL18)
AT1G08560	×	up	Repressed	syntaxin of plants 111 (SYP111)
AT1G08630	down	down	Induced	threonine aldolase 1 (THA1)
AT1G09460	down	×	Induced	Carbohydrate-binding X8 domain superfamily protein
AT1G09570	×	down	Induced	phytochrome A (PHYA)
AT1G09610	up	up	Repressed	Protein of unknown function (DUF579)
AT1G10070	down	down	Induced	branched-chain amino acid transaminase 2 (BCAT-2)
AT1G10340	down	×	Induced	Ankyrin repeat family protein
AT1G10550	×	down	Induced	xyloglucan:xyloglucosyl transferase 33 (XTH33)
AT1G10657	up	up	Repressed	Plant protein 1589 of unknown function
AT1G10810	×	up	Repressed	NAD(P)-linked oxidoreductase superfamily protein
AT1G11070	up	×	Repressed	BEST Arabidopsis thaliana protein match is: Hydroxyproline-rich glycoprotein family protein (TAIR:AT1G61080.1)
AT1G11112	×	up	Repressed	unknown protein
AT1G11160	×	up	Repressed	Transducin/WD40 repeat-like superfamily protein
AT1G11260	×	down	Induced	sugar transporter 1 (STP1)
AT1G11300	×	up	Repressed	protein serine/threonine kinases
AT1G11330	up	up	Repressed	S-locus lectin protein kinase family protein
AT1G11700	×	up	Repressed	Protein of unknown function, DUF584
AT1G11960	×	down	Induced	ERD (early-responsive to dehydration stress) family protein
AT1G12080	×	down	Induced	Vacuolar calcium-binding protein-related
AT1G12340	up	×	Repressed	Cornichon family protein
AT1G12420	×	down	Induced	ACT domain repeat 8 (ACR8)
AT1G12610	×	down	Induced	DWARF AND DELAYED FLOWERING 1 (DDF1)
AT1G12805	×	up	Repressed	nucleotide binding
AT1G12900	×	up	Repressed	glyceraldehyde 3-phosphate dehydrogenase A subunit 2 (GAPA-2)
AT1G13300	up	×	Repressed	HYPERSENSITIVITY TO LOW PI-ELICITED PRIMARY ROOT SHORTENING 1 (HRS1)
AT1G13340	down	down	Induced	Regulator of Vps4 activity in the MVB pathway protein
AT1G13420	up	up	Repressed	sulfotransferase 4B (ST4B)
AT1G13448	×	up	Repressed	other RNA
AT1G13700	×	up	Repressed	6-phosphogluconolactonase 1 (PGL1)
AT1G13790	×	up	Repressed	XH/XS domain-containing protein
AT1G14345	×	up	Repressed	NAD(P)-linked oxidoreductase superfamily protein
AT1G14350	×	down	Induced	FOUR LIPS (FLP)
AT1G14430	×	up	Repressed	glyoxal oxidase-related protein
AT1G14860	×	down	Induced	nudix hydrolase homolog 18 (NUDT18)
AT1G14890	×	down	Induced	Plant invertase/pectin methylesterase inhibitor superfamily protein
AT1G14930	down	down	Induced	Polyketide cyclase/dehydrase and lipid transport superfamily protein
AT1G14950	down	down	Induced	Polyketide cyclase/dehydrase and lipid transport superfamily protein
AT1G14960	×	up	Repressed	Polyketide cyclase/dehydrase and lipid transport superfamily protein
AT1G14980	×	up	Repressed	chaperonin 10 (CPN10)
AT1G15010	down	down	Induced	unknown protein
AT1G15040	down	down	Induced	Class I glutamine amidotransferase-like superfamily protein
AT1G15175	×	up	Repressed	other RNA
AT1G15330	×	down	Induced	Cystathionine beta-synthase (CBS) protein
AT1G15380	down	×	Induced	Lactoylglutathione lyase / glyoxalase I family protein
AT1G15460	up	up	Repressed	REQUIRES HIGH BORON 4 (BOR4)
AT1G15580	up	up	Repressed	indole-3-acetic acid inducible 5 (IAA5)
AT1G15800	×	down	Induced	unknown protein
AT1G15820	up	up	Repressed	light harvesting complex photosystem II subunit 6 (LHCB6)
AT1G16130	×	down	Induced	wall associated kinase-like 2 (WAKL2)
AT1G16400	up	up	Repressed	cytochrome P450, family 79, subfamily F, polypeptide 2 (CYP79F2)
AT1G16445	up	up	Repressed	S-adenosyl-L-methionine-dependent methyltransferases superfamily protein
AT1G16490	×	down	Induced	myb domain protein 58 (MYB58)
AT1G16635	up	up	Repressed	unknown gene
AT1G16730	×	down	Induced	unknown protein 6 (UP6)
AT1G16850	down	down	Induced	unknown protein
AT1G17300	×	down	Induced	unknown protein
AT1G17345	×	up	Repressed	SAUR-like auxin-responsive protein family
AT1G17810	down	down	Induced	beta-tonoplast intrinsic protein (BETA-TIP)
AT1G18060	×	up	Repressed	unknown protein
AT1G18200	down	×	Induced	RAB GTPase homolog A6B (RABA6b)
AT1G18250	×	up	Repressed	ATLP-1
AT1G18270	down	×	Induced	ketose-bisphosphate aldolase class-II family protein
AT1G18400	×	down	Induced	BR enhanced expression 1 (BEE1)
AT1G18570	×	down	Induced	myb domain protein 51 (MYB51)
AT1G18810	×	up	Repressed	phytochrome kinase substrate-related
AT1G19510	×	down	Induced	RAD-like 5 (RL5)
AT1G19530	down	down	Induced	unknown protein
AT1G19940	×	down	Induced	glycosyl hydrolase 9B5 (GH9B5)
AT1G20190	×	down	Induced	expansin 11 (EXPA11)
AT1G20450	×	down	Induced	EARLY RESPONSIVE TO DEHYDRATION 10 (ERD10)
AT1G20520	×	down	Induced	Arabidopsis protein of unknown function (DUF241)
AT1G20790	×	down	Induced	F-box family protein
AT1G20823	×	up	Repressed	RING/U-box superfamily protein
AT1G20900	×	down	Induced	ESCAROLA (ESC)
AT1G21360	down	×	Induced	glycolipid transfer protein 2 (GLTP2)
AT1G21400	down	down	Induced	Thiamin diphosphate-binding fold (THDP-binding) superfamily protein
AT1G21500	up	up	Repressed	unknown protein
AT1G21520	×	up	Repressed	unknown protein
AT1G21540	up	×	Repressed	AMP-dependent synthetase and ligase family protein
AT1G21680	×	down	Induced	DPP6 N-terminal domain-like protein
AT1G22220	×	up	Repressed	F-box family protein
AT1G22400	×	up	Repressed	UGT85A1
AT1G22590	up	up	Repressed	AGAMOUS-like 87 (AGL87)
AT1G22600	×	down	Induced	Late embryogenesis abundant protein (LEA) family protein
AT1G22740	×	down	Induced	RAB GTPase homolog G3B (RABG3B)
AT1G22890	×	down	Induced	unknown protein
AT1G22980	×	up	Repressed	unknown protein
AT1G23052	×	down	Induced	unknown gene
AT1G23100	up	up	Repressed	GroES-like family protein
AT1G23130	up	up	Repressed	Polyketide cyclase/dehydrase and lipid transport superfamily protein
AT1G23210	×	up	Repressed	glycosyl hydrolase 9B6 (GH9B6)
AT1G23790	up	up	Repressed	Plant protein of unknown function (DUF936)
AT1G24020	up	up	Repressed	MLP-like protein 423 (MLP423)
AT1G24095	×	up	Repressed	Putative thiol-disulphide oxidoreductase DCC
AT1G24280	×	up	Repressed	glucose-6-phosphate dehydrogenase 3 (G6PD3)
AT1G24530	×	up	Repressed	Transducin/WD40 repeat-like superfamily protein
AT1G24580	up	×	Repressed	RING/U-box superfamily protein
AT1G25440	up	up	Repressed	B-box type zinc finger protein with CCT domain
AT1G26250	×	up	Repressed	Proline-rich extensin-like family protein
AT1G26290	×	down	Induced	unknown protein
AT1G26360	×	up	Repressed	methyl esterase 13 (MES13)
AT1G26380	×	down	Induced	FAD-binding Berberine family protein
AT1G26730	×	down	Induced	EXS (ERD1/XPR1/SYG1) family protein
AT1G26761	up	up	Repressed	Arabinanase/levansucrase/invertase
AT1G26762	up	up	Repressed	unknown protein
AT1G26770	×	up	Repressed	expansin A10 (EXPA10)
AT1G26840	×	up	Repressed	origin recognition complex protein 6 (ORC6)
AT1G26945	down	down	Induced	KIDARI (KDR)
AT1G27030	×	up	Repressed	unknown protein
AT1G27461	×	down	Induced	unknown protein
AT1G27670	×	down	Induced	unknown protein
AT1G27990	down	down	Induced	unknown protein
AT1G28330	×	down	Induced	dormancy-associated protein-like 1
AT1G28450	×	down	Induced	AGAMOUS-like 58 (AGL58)
AT1G28570	up	up	Repressed	SGNH hydrolase-type esterase superfamily protein
AT1G28610	×	up	Repressed	GDSL-like Lipase/Acylhydrolase superfamily protein
AT1G29195	×	down	Induced	unknown protein
AT1G29395	×	down	Induced	COLD REGULATED 314 INNER MEMBRANE 1 (COR413IM1)
AT1G29660	up	up	Repressed	GDSL-like Lipase/Acylhydrolase superfamily protein
AT1G29680	down	×	Induced	Protein of unknown function (DUF1264)
AT1G29910	up	up	Repressed	chlorophyll A/B binding protein 3 (CAB3)
AT1G29920	up	up	Repressed	chlorophyll A/B-binding protein 2 (CAB2)
AT1G29930	up	up	Repressed	chlorophyll A/B binding protein 1 (CAB1)
AT1G30080	×	down	Induced	Glycosyl hydrolase superfamily protein
AT1G30100	up	×	Repressed	nine-cis-epoxycarotenoid dioxygenase 5 (NCED5)
AT1G30170	up	up	Repressed	Protein of unknown function (DUF295)
AT1G30250	×	up	Repressed	unknown protein
AT1G30380	up	up	Repressed	photosystem I subunit K (PSAK)
AT1G30515	×	down	Induced	unknown protein
AT1G30530	×	up	Repressed	UDP-glucosyl transferase 78D1 (UGT78D1)
AT1G30600	×	up	Repressed	Subtilase family protein
AT1G30720	down	down	Induced	FAD-binding Berberine family protein
AT1G30730	×	down	Induced	FAD-binding Berberine family protein
AT1G30760	×	down	Induced	FAD-binding Berberine family protein
AT1G31040	×	down	Induced	PLATZ transcription factor family protein
AT1G31173	×	down	Induced	MIR167D
AT1G31310	×	down	Induced	hydroxyproline-rich glycoprotein family protein
AT1G31330	up	up	Repressed	photosystem I subunit F (PSAF)
AT1G31550	×	up	Repressed	GDSL-like Lipase/Acylhydrolase superfamily protein
AT1G31580	up	up	Repressed	ECS1
AT1G31820	up	×	Repressed	Amino acid permease family protein
AT1G32170	×	down	Induced	xyloglucan endotransglucosylase/hydrolase 30 (XTH30)
AT1G32450	down	×	Induced	nitrate transporter 1.5 (NRT1.5)
AT1G33600	×	up	Repressed	Leucine-rich repeat (LRR) family protein
AT1G33750	×	up	Repressed	Terpenoid cyclases/Protein prenyltransferases superfamily protein
AT1G33811	up	×	Repressed	GDSL-like Lipase/Acylhydrolase superfamily protein
AT1G34245	×	up	Repressed	EPIDERMAL PATTERNING FACTOR 2 (EPF2)
AT1G34330	×	up	Repressed	pseudogene, putative peroxidase, similar to anionic peroxidase GI:559235 from (Petroselinum crispum)
AT1G34630	×	down	Induced	BEST Arabidopsis thaliana protein match is: Mitochondrial import inner membrane translocase subunit Tim17/Tim22/Tim23 family protein (TAIR:AT5G51150.1)
AT1G35115	×	down	Induced	copia-like retrotransposon family, has a 1.1e-168 P-value blast match to gb|AAO73527.1| gag-pol polyprotein (Glycine max) (SIRE1) (Ty1_Copia-family)
AT1G35230	×	down	Induced	arabinogalactan protein 5 (AGP5)
AT1G35290	×	up	Repressed	Thioesterase superfamily protein
AT1G36180	×	up	Repressed	acetyl-CoA carboxylase 2 (ACC2)
AT1G43780	×	up	Repressed	serine carboxypeptidase-like 44 (scpl44)
AT1G43800	up	up	Repressed	Plant stearoyl-acyl-carrier-protein desaturase family protein
AT1G44000	×	up	Repressed	unknown protein
AT1G44446	up	up	Repressed	CHLORINA 1 (CH1)
AT1G44542	×	down	Induced	Cyclase family protein
AT1G45130	×	down	Induced	beta-galactosidase 5 (BGAL5)
AT1G45201	up	up	Repressed	triacylglycerol lipase-like 1 (TLL1)
AT1G45231	×	up	Repressed	S-adenosyl-L-methionine-dependent methyltransferases superfamily protein
AT1G47630	×	down	Induced	pseudogene, cytochrome P450 family, similar to Cytochrome P450 86A2 (SP:O23066) (Arabidopsis thaliana)
AT1G47980	down	×	Induced	unknown protein
AT1G48130	down	down	Induced	1-cysteine peroxiredoxin 1 (PER1)
AT1G48820	×	down	Induced	Terpenoid cyclases/Protein prenyltransferases superfamily protein
AT1G49130	×	down	Induced	B-box type zinc finger protein with CCT domain
AT1G49210	down	×	Induced	RING/U-box superfamily protein
AT1G49450	up	up	Repressed	Transducin/WD40 repeat-like superfamily protein
AT1G49570	down	down	Induced	Peroxidase superfamily protein
AT1G49750	up	×	Repressed	Leucine-rich repeat (LRR) family protein
AT1G49990	up	×	Repressed	F-box family protein
AT1G50060	×	up	Repressed	CAP (Cysteine-rich secretory proteins, Antigen 5, and Pathogenesis-related 1 protein) superfamily protein
AT1G50280	×	up	Repressed	Phototropic-responsive NPH3 family protein
AT1G50732	×	up	Repressed	unknown protein.
AT1G51080	up	×	Repressed	unknown protein
AT1G51260	×	up	Repressed	lysophosphatidyl acyltransferase 3 (LPAT3)
AT1G51380	×	up	Repressed	DEA(D/H)-box RNA helicase family protein
AT1G51400	up	up	Repressed	Photosystem II 5 kD protein
AT1G51530	×	down	Induced	RNA-binding (RRM/RBD/RNP motifs) family protein
AT1G51805	up	up	Repressed	Leucine-rich repeat protein kinase family protein
AT1G52050	×	up	Repressed	Mannose-binding lectin superfamily protein
AT1G52060	up	×	Repressed	Mannose-binding lectin superfamily protein
AT1G52070	up	up	Repressed	Mannose-binding lectin superfamily protein
AT1G52100	up	×	Repressed	Mannose-binding lectin superfamily protein
AT1G52110	×	down	Induced	Mannose-binding lectin superfamily protein
AT1G52230	up	up	Repressed	photosystem I subunit H2 (PSAH2)
AT1G52270	×	up	Repressed	unknown protein
AT1G52343	×	down	Induced	unknown protein
AT1G52400	×	up	Repressed	beta glucosidase 18 (BGLU18)
AT1G52410	×	up	Repressed	TSK-associating protein 1 (TSA1)
AT1G52415	×	down	Induced	Bifunctional inhibitor/lipid-transfer protein/seed storage 2S albumin superfamily protein
AT1G52560	up	×	Repressed	HSP20-like chaperones superfamily protein
AT1G52570	×	down	Induced	phospholipase D alpha 2 (PLDALPHA2)
AT1G52830	×	down	Induced	indole-3-acetic acid 6 (IAA6)
AT1G53070	up	up	Repressed	Legume lectin family protein
AT1G53080	down	down	Induced	Legume lectin family protein
AT1G53390	×	up	Repressed	P-loop containing nucleoside triphosphate hydrolases superfamily protein
AT1G53470	×	down	Induced	mechanosensitive channel of small conductance-like 4 (MSL4)
AT1G53480	down	×	Induced	MTO 1 RESPONDING DOWN 1 (MRD1)
AT1G53490	down	×	Induced	RING/U-box superfamily protein
AT1G53635	×	up	Repressed	unknown protein
AT1G53680	×	up	Repressed	glutathione S-transferase TAU 28 (GSTU28)
AT1G53700	down	down	Induced	WAG 1 (WAG1)
AT1G53708	×	up	Repressed	ROTUNDIFOLIA like 9 (RTFL9)
AT1G54000	up	×	Repressed	GDSL-like Lipase/Acylhydrolase superfamily protein
AT1G54020	up	up	Repressed	GDSL-like Lipase/Acylhydrolase superfamily protein
AT1G54040	×	up	Repressed	epithiospecifier protein (ESP)
AT1G54820	×	up	Repressed	Protein kinase superfamily protein
AT1G54870	down	×	Induced	NAD(P)-binding Rossmann-fold superfamily protein
AT1G55200	×	up	Repressed	Protein kinase protein with adenine nucleotide alpha hydrolases-like domain
AT1G55670	up	up	Repressed	photosystem I subunit G (PSAG)
AT1G55910	×	up	Repressed	zinc transporter 11 precursor (ZIP11)
AT1G56220	×	down	Induced	Dormancy/auxin associated family protein
AT1G56250	×	down	Induced	phloem protein 2-B14 (PP2-B14)
AT1G56300	×	down	Induced	Chaperone DnaJ-domain superfamily protein
AT1G56320	×	up	Repressed	BEST Arabidopsis thaliana protein match is: Glycine-rich protein family (TAIR:AT5G49350.2)
AT1G56430	×	up	Repressed	nicotianamine synthase 4 (NAS4)
AT1G56540	×	down	Induced	Disease resistance protein (TIR-NBS-LRR class) family
AT1G56650	up	up	Repressed	production of anthocyanin pigment 1 (PAP1)
AT1G56660	down	down	Induced	unknown protein
AT1G56680	up	up	Repressed	Chitinase family protein
AT1G57570	down	×	Induced	Mannose-binding lectin superfamily protein
AT1G57590	up	up	Repressed	Pectinacetylesterase family protein
AT1G57750	×	up	Repressed	cytochrome P450, family 96, subfamily A, polypeptide 15 (CYP96A15)
AT1G57980	×	up	Repressed	Nucleotide-sugar transporter family protein
AT1G58180	down	down	Induced	beta carbonic anhydrase 6 (BCA6)
AT1G58290	×	up	Repressed	HEMA1
AT1G58340	up	up	Repressed	ZF14
AT1G58410	×	down	Induced	Disease resistance protein (CC-NBS-LRR class) family
AT1G59730	×	up	Repressed	thioredoxin H-type 7 (TH7)
AT1G60000	×	up	Repressed	RNA-binding (RRM/RBD/RNP motifs) family protein
AT1G60060	×	down	Induced	Serine/threonine-protein kinase WNK (With No Lysine)-related
AT1G60260	up	×	Repressed	beta glucosidase 5 (BGLU5)
AT1G60590	×	up	Repressed	Pectin lyase-like superfamily protein
AT1G60950	up	up	Repressed	FED A
AT1G61050	×	up	Repressed	alpha 1,4-glycosyltransferase family protein
AT1G61190	×	up	Repressed	LRR and NB-ARC domains-containing disease resistance protein
AT1G61460	down	×	Induced	S-locus protein kinase, putative
AT1G61520	up	up	Repressed	photosystem I light harvesting complex gene 3 (LHCA3)
AT1G61740	×	down	Induced	Sulfite exporter TauE/SafE family protein
AT1G62280	down	down	Induced	SLAC1 homologue 1 (SLAH1)
AT1G62380	×	down	Induced	ACC oxidase 2 (ACO2)
AT1G62410	down	down	Induced	MIF4G domain-containing protein
AT1G62420	down	down	Induced	Protein of unknown function (DUF506)
AT1G62480	×	down	Induced	Vacuolar calcium-binding protein-related
AT1G62610	×	down	Induced	NAD(P)-binding Rossmann-fold superfamily protein
AT1G62710	×	down	Induced	beta vacuolar processing enzyme (BETA-VPE)
AT1G62975	up	×	Repressed	basic helix-loop-helix (bHLH) DNA-binding superfamily protein
AT1G63040	down	down	Induced	pseudogene, DRE binding protein, similar to GI:3738224 from (Arabidopsis thaliana) (Plant Cell 10 (8), 1391-1406 (1998))
AT1G63070	×	down	Induced	pentatricopeptide (PPR) repeat-containing protein
AT1G63360	×	up	Repressed	Disease resistance protein (CC-NBS-LRR class) family
AT1G63880	up	up	Repressed	Disease resistance protein (TIR-NBS-LRR class) family
AT1G64110	down	down	Induced	P-loop containing nucleoside triphosphate hydrolases superfamily protein
AT1G64450	×	up	Repressed	Glycine-rich protein family
AT1G64640	×	down	Induced	early nodulin-like protein 8 (ENODL8)
AT1G64660	down	down	Induced	methionine gamma-lyase (MGL)
AT1G64780	up	up	Repressed	ammonium transporter 1
AT1G64910	×	up	Repressed	UDP-Glycosyltransferase superfamily protein
AT1G65030	×	up	Repressed	Transducin/WD40 repeat-like superfamily protein
AT1G65060	up	up	Repressed	4-coumarate:CoA ligase 3 (4CL3)
AT1G65090	×	down	Induced	unknown protein
AT1G65710	up	up	Repressed	unknown protein
AT1G65875	×	down	Induced	pseudogene, similar to EST AU070346(S12172) corresponds to a region of the predicted gene.~similar to AMP-binding protein. (X94625), blastp match of 57% identity and 4.5e-137 P-value to GP|6063549|dbj|BAA85409.1||AP000615 EST AU070346(S12172) corresponds to a region of the predicted gene.~similar to AMP-binding protein. (X94625) {Oryza sativa (japonica cultivar-group)}
AT1G65900	×	up	Repressed	unknown protein
AT1G65970	×	down	Induced	thioredoxin-dependent peroxidase 2 (TPX2)
AT1G66050	×	up	Repressed	VARIANT IN METHYLATION 2 (VIM2)
AT1G66360	×	up	Repressed	Calcium-dependent lipid-binding (CaLB domain) family protein
AT1G66780	×	down	Induced	MATE efflux family protein
AT1G66970	×	up	Repressed	SHV3-like 2 (SVL2)
AT1G67035	up	up	Repressed	unknown protein
AT1G67100	×	down	Induced	LOB domain-containing protein 40 (LBD40)
AT1G67110	×	up	Repressed	cytochrome P450, family 735, subfamily A, polypeptide 2 (CYP735A2)
AT1G67265	down	down	Induced	ROTUNDIFOLIA like 21 (RTFL21)
AT1G67270	down	down	Induced	Zinc-finger domain of monoamine-oxidase A repressor R1 protein
AT1G67310	×	down	Induced	Calmodulin-binding transcription activator protein with CG-1 and Ankyrin domains
AT1G67470	×	up	Repressed	Protein kinase superfamily protein
AT1G67980	down	down	Induced	caffeoyl-CoA 3-O-methyltransferase (CCOAMT)
AT1G68390	×	up	Repressed	Core-2/I-branching beta-1,6-N-acetylglucosaminyltransferase family protein
AT1G68520	up	up	Repressed	B-box type zinc finger protein with CCT domain
AT1G68620	down	down	Induced	alpha/beta-Hydrolases superfamily protein
AT1G68740	×	up	Repressed	PHO1
AT1G68800	×	down	Induced	TCP domain protein 12 (TCP12)
AT1G68850	up	×	Repressed	Peroxidase superfamily protein
AT1G69160	×	up	Repressed	unknown protein
AT1G69490	down	down	Induced	NAC-like, activated by AP3/PI (NAP)
AT1G69570	×	down	Induced	Dof-type zinc finger DNA-binding family protein
AT1G69690	×	down	Induced	TCP family transcription factor
AT1G69930	×	down	Induced	glutathione S-transferase TAU 11 (GSTU11)
AT1G70420	×	down	Induced	Protein of unknown function (DUF1645)
AT1G70440	×	up	Repressed	similar to RCD one 3 (SRO3)
AT1G70710	×	down	Induced	glycosyl hydrolase 9B1 (GH9B1)
AT1G70820	×	up	Repressed	phosphoglucomutase, putative / glucose phosphomutase, putative
AT1G70840	down	×	Induced	MLP-like protein 31 (MLP31)
AT1G70890	×	up	Repressed	MLP-like protein 43 (MLP43)
AT1G71030	down	down	Induced	MYB-like 2 (MYBL2)
AT1G71250	down	down	Induced	GDSL-like Lipase/Acylhydrolase superfamily protein
AT1G71692	up	up	Repressed	AGAMOUS-like 12 (AGL12)
AT1G71850	×	up	Repressed	Ubiquitin carboxyl-terminal hydrolase family protein
AT1G71890	×	up	Repressed	SUC5
AT1G72100	×	down	Induced	late embryogenesis abundant domain-containing protein / LEA domain-containing protein
AT1G72290	down	down	Induced	Kunitz family trypsin and protease inhibitor protein
AT1G72490	down	down	Induced	unknown protein
AT1G72520	×	down	Induced	PLAT/LH2 domain-containing lipoxygenase family protein
AT1G72610	up	up	Repressed	germin-like protein 1 (GER1)
AT1G72670	×	up	Repressed	IQ-domain 8 (iqd8)
AT1G73000	down	down	Induced	PYR1-like 3 (PYL3)
AT1G73190	down	down	Induced	TIP3
AT1G73260	×	down	Induced	kunitz trypsin inhibitor 1 (KTI1)
AT1G73330	up	up	Repressed	drought-repressed 4 (DR4)
AT1G73550	up	up	Repressed	Bifunctional inhibitor/lipid-transfer protein/seed storage 2S albumin superfamily protein
AT1G73620	up	up	Repressed	Pathogenesis-related thaumatin superfamily protein
AT1G73630	up	up	Repressed	EF hand calcium-binding protein family
AT1G73830	down	×	Induced	BR enhanced expression 3 (BEE3)
AT1G73870	×	up	Repressed	B-box type zinc finger protein with CCT domain
AT1G74070	×	up	Repressed	Cyclophilin-like peptidyl-prolyl cis-trans isomerase family protein
AT1G74460	up	×	Repressed	GDSL-like Lipase/Acylhydrolase superfamily protein
AT1G74490	down	down	Induced	Protein kinase superfamily protein
AT1G74650	×	down	Induced	myb domain protein 31 (MYB31)
AT1G74670	×	up	Repressed	Gibberellin-regulated family protein
AT1G74730	×	up	Repressed	Protein of unknown function (DUF1118)
AT1G74870	×	up	Repressed	RING/U-box superfamily protein
AT1G74930	up	×	Repressed	ORA47
AT1G75450	×	down	Induced	cytokinin oxidase 5 (CKX5)
AT1G75580	up	up	Repressed	SAUR-like auxin-responsive protein family
AT1G75780	×	down	Induced	tubulin beta-1 chain (TUB1)
AT1G75900	×	down	Induced	GDSL-like Lipase/Acylhydrolase superfamily protein
AT1G76080	up	up	Repressed	chloroplastic drought-induced stress protein of 32 kD (CDSP32)
AT1G76100	up	up	Repressed	plastocyanin 1 (PETE1)
AT1G76120	×	up	Repressed	Pseudouridine synthase family protein
AT1G76410	×	down	Induced	ATL8
AT1G76610	×	up	Repressed	Protein of unknown function, DUF617
AT1G76878	×	down	Induced	other RNA
AT1G77000	×	down	Induced	SKP2B
AT1G77200	×	down	Induced	Integrase-type DNA-binding superfamily protein
AT1G77330	×	down	Induced	2-oxoglutarate (2OG) and Fe(II)-dependent oxygenase superfamily protein
AT1G77520	×	down	Induced	O-methyltransferase family protein
AT1G77740	×	down	Induced	phosphatidylinositol-4-phosphate 5-kinase 2 (PIP5K2)
AT1G77765	×	up	Repressed	unknown protein
AT1G77950	down	down	Induced	AGAMOUS-like 67 (AGL67)
AT1G78120	×	up	Repressed	Tetratricopeptide repeat (TPR)-like superfamily protein
AT1G78230	×	down	Induced	Outer arm dynein light chain 1 protein
AT1G78320	×	up	Repressed	glutathione S-transferase TAU 23 (GSTU23)
AT1G78460	×	up	Repressed	SOUL heme-binding family protein
AT1G78480	×	up	Repressed	Prenyltransferase family protein
AT1G78490	up	up	Repressed	cytochrome P450, family 708, subfamily A, polypeptide 3 (CYP708A3)
AT1G78700	×	down	Induced	BES1/BZR1 homolog 4 (BEH4)
AT1G78820	×	up	Repressed	D-mannose binding lectin protein with Apple-like carbohydrate-binding domain
AT1G78970	×	down	Induced	lupeol synthase 1 (LUP1)
AT1G78995	up	up	Repressed	unknown protein
AT1G79700	×	down	Induced	Integrase-type DNA-binding superfamily protein
AT1G79760	×	up	Repressed	downstream target of AGL15-4 (DTA4)
AT1G80090	×	down	Induced	Cystathionine beta-synthase (CBS) family protein
AT1G80120	×	up	Repressed	Protein of unknown function (DUF567)
AT1G80160	down	down	Induced	Lactoylglutathione lyase / glyoxalase I family protein
AT1G80180	×	down	Induced	unknown protein
AT1G80740	×	up	Repressed	chromomethylase 1 (CMT1)
AT1G80840	down	×	Induced	WRKY DNA-binding protein 40 (WRKY40)
AT1G80920	×	down	Induced	J8
AT2G01422	down	×	Induced	unknown gene
AT2G01460	down	×	Induced	P-loop containing nucleoside triphosphate hydrolases superfamily protein
AT2G01610	×	down	Induced	Plant invertase/pectin methylesterase inhibitor superfamily protein
AT2G01760	×	up	Repressed	response regulator 14 (RR14)
AT2G01890	×	up	Repressed	purple acid phosphatase 8 (PAP8)
AT2G01913	×	up	Repressed	unknown protein
AT2G02000	×	up	Repressed	glutamate decarboxylase 3 (GAD3)
AT2G02630	×	down	Induced	Cysteine/Histidine-rich C1 domain family protein
AT2G02820	×	down	Induced	myb domain protein 88 (MYB88)
AT2G02930	down	×	Induced	glutathione S-transferase F3 (GSTF3)
AT2G03090	up	up	Repressed	expansin A15 (EXPA15)
AT2G03750	up	up	Repressed	P-loop containing nucleoside triphosphate hydrolases superfamily protein
AT2G04090	×	up	Repressed	MATE efflux family protein
AT2G04690	×	down	Induced	Pyridoxamine 5'-phosphate oxidase family protein
AT2G05070	up	up	Repressed	photosystem II light harvesting complex gene 2.2 (LHCB2.2)
AT2G05100	up	up	Repressed	photosystem II light harvesting complex gene 2.1 (LHCB2.1)
AT2G05370	down	down	Induced	BEST Arabidopsis thaliana protein match is: RNA-dependent RNA polymerase 6 (TAIR:AT3G49500.1)
AT2G05540	down	down	Induced	Glycine-rich protein family
AT2G05914	×	up	Repressed	Potential natural antisense gene, locus overlaps with AT2G05915
AT2G06520	up	up	Repressed	photosystem II subunit X (PSBX)
AT2G06925	×	up	Repressed	PLA2-ALPHA
AT2G07711	×	up	Repressed	pseudogene, similar to NADH dehydrogenase subunit 5, blastp match of 97% identity and 2.2e-244 P-value to GP|1066145|dbj|BAA07176.1||D37958 NADH dehydrogenase subunit 5 {Malus x domestica}
AT2G07715	×	up	Repressed	Nucleic acid-binding, OB-fold-like protein
AT2G07779	down	×	Induced	unknown protein
AT2G13610	up	up	Repressed	ABC-2 type transporter family protein
AT2G14070	up	×	Repressed	wound-responsive protein-related
AT2G14460	up	×	Repressed	unknown protein
AT2G14610	×	up	Repressed	pathogenesis-related gene 1 (PR1)
AT2G14900	×	down	Induced	Gibberellin-regulated family protein
AT2G14960	up	×	Repressed	GH3.1
AT2G15010	down	down	Induced	Plant thionin
AT2G15370	up	×	Repressed	fucosyltransferase 5 (FUT5)
AT2G15620	×	up	Repressed	nitrite reductase 1 (NIR1)
AT2G16005	up	up	Repressed	MD-2-related lipid recognition domain-containing protein
AT2G16060	×	up	Repressed	hemoglobin 1 (HB1)
AT2G16230	up	up	Repressed	O-Glycosyl hydrolases family 17 protein
AT2G16660	×	up	Repressed	Major facilitator superfamily protein
AT2G16760	×	up	Repressed	Calcium-dependent phosphotriesterase superfamily protein
AT2G16850	×	up	Repressed	plasma membrane intrinsic protein 2
AT2G17680	×	down	Induced	Arabidopsis protein of unknown function (DUF241)
AT2G17740	down	down	Induced	Cysteine/Histidine-rich C1 domain family protein
AT2G17850	×	up	Repressed	Rhodanese/Cell cycle control phosphatase superfamily protein
AT2G18050	down	down	Induced	histone H1-3 (HIS1-3)
AT2G18150	up	up	Repressed	Peroxidase superfamily protein
AT2G18193	×	up	Repressed	P-loop containing nucleoside triphosphate hydrolases superfamily protein
AT2G18210	up	×	Repressed	unknown protein
AT2G18280	down	down	Induced	tubby like protein 2 (TLP2)
AT2G18340	up	×	Repressed	late embryogenesis abundant domain-containing protein / LEA domain-containing protein
AT2G18540	×	down	Induced	RmlC-like cupins superfamily protein
AT2G18700	×	down	Induced	trehalose phosphatase/synthase 11 (TPS11)
AT2G18800	×	up	Repressed	xyloglucan endotransglucosylase/hydrolase 21 (XTH21)
AT2G18969	down	down	Induced	BEST Arabidopsis thaliana protein match is: sequence-specific DNA binding transcription factors
AT2G19400	×	up	Repressed	AGC (cAMP-dependent, cGMP-dependent and protein kinase C) kinase family protein
AT2G19660	×	down	Induced	Cysteine/Histidine-rich C1 domain family protein
AT2G19670	×	up	Repressed	protein arginine methyltransferase 1A (PRMT1A)
AT2G19810	×	down	Induced	CCCH-type zinc finger family protein
AT2G19900	down	down	Induced	NADP-malic enzyme 1 (NADP-ME1)
AT2G19960	×	down	Induced	hAT family dimerisation domain
AT2G19970	×	down	Induced	CAP (Cysteine-rich secretory proteins, Antigen 5, and Pathogenesis-related 1 protein) superfamily protein
AT2G20080	×	down	Induced	unknown protein
AT2G20180	down	down	Induced	phytochrome interacting factor 3-like 5 (PIL5)
AT2G20260	up	up	Repressed	photosystem I subunit E-2 (PSAE-2)
AT2G20670	down	×	Induced	Protein of unknown function (DUF506)
AT2G20880	×	down	Induced	Integrase-type DNA-binding superfamily protein
AT2G21140	×	down	Induced	proline-rich protein 2 (PRP2)
AT2G21330	×	up	Repressed	fructose-bisphosphate aldolase 1 (FBA1)
AT2G21350	×	up	Repressed	RNA-binding CRS1 / YhbY (CRM) domain protein
AT2G21450	×	up	Repressed	chromatin remodeling 34 (CHR34)
AT2G21490	×	down	Induced	dehydrin LEA (LEA)
AT2G21540	×	down	Induced	SEC14-like 3 (SFH3)
AT2G21720	down	×	Induced	Plant protein of unknown function (DUF639)
AT2G21910	×	down	Induced	cytochrome P450, family 96, subfamily A, polypeptide 5 (CYP96A5)
AT2G22080	×	down	Induced	unknown protein
AT2G22510	×	up	Repressed	hydroxyproline-rich glycoprotein family protein
AT2G22730	×	down	Induced	Major facilitator superfamily protein
AT2G22810	up	up	Repressed	1-aminocyclopropane-1-carboxylate synthase 4 (ACS4)
AT2G22860	×	down	Induced	phytosulfokine 2 precursor (PSK2)
AT2G23110	×	down	Induced	Late embryogenesis abundant protein, group 6
AT2G23130	×	up	Repressed	arabinogalactan protein 17 (AGP17)
AT2G23180	×	up	Repressed	cytochrome P450, family 96, subfamily A, polypeptide 1 (CYP96A1)
AT2G23410	×	up	Repressed	cis-prenyltransferase (CPT)
AT2G23540	×	up	Repressed	GDSL-like Lipase/Acylhydrolase superfamily protein
AT2G23630	up	up	Repressed	SKU5 similar 16 (sks16)
AT2G23640	down	down	Induced	Reticulan like protein B13 (RTNLB13)
AT2G23670	up	up	Repressed	homolog of Synechocystis YCF37 (YCF37)
AT2G24255	×	up	Repressed	unknown protein
AT2G24300	×	down	Induced	Calmodulin-binding protein
AT2G24400	up	×	Repressed	SAUR-like auxin-responsive protein family
AT2G24645	×	up	Repressed	Transcriptional factor B3 family protein
AT2G24762	×	up	Repressed	glutamine dumper 4 (GDU4)
AT2G25060	up	up	Repressed	early nodulin-like protein 14 (ENODL14)
AT2G25130	×	down	Induced	ARM repeat superfamily protein
AT2G25150	×	up	Repressed	HXXXD-type acyl-transferase family protein
AT2G25270	×	up	Repressed	unknown protein
AT2G25450	down	×	Induced	2-oxoglutarate (2OG) and Fe(II)-dependent oxygenase superfamily protein
AT2G25770	×	down	Induced	Polyketide cyclase/dehydrase and lipid transport superfamily protein
AT2G25880	×	up	Repressed	ataurora2 (AUR2)
AT2G25890	×	down	Induced	Oleosin family protein
AT2G26040	up	up	Repressed	PYR1-like 2 (PYL2)
AT2G26440	×	down	Induced	Plant invertase/pectin methylesterase inhibitor superfamily
AT2G26450	up	×	Repressed	Plant invertase/pectin methylesterase inhibitor superfamily
AT2G26695	×	down	Induced	Ran BP2/NZF zinc finger-like superfamily protein
AT2G27300	down	down	Induced	NTM1-like 8 (NTL8)
AT2G27402	×	up	Repressed	BEST Arabidopsis thaliana protein match is: plastid transcriptionally active 18 (TAIR:AT2G32180.1)
AT2G27550	×	up	Repressed	centroradialis (ATC)
AT2G27775	×	up	Repressed	FUNCTIONS IN: molecular_function unknown
AT2G27830	×	down	Induced	unknown protein
AT2G27840	×	up	Repressed	HDT4
AT2G27930	down	×	Induced	PLATZ transcription factor family protein
AT2G27940	down	down	Induced	RING/U-box superfamily protein
AT2G28085	down	down	Induced	SAUR-like auxin-responsive protein family
AT2G28140	up	up	Repressed	Protein of unknown function (DUF1635)
AT2G28400	×	down	Induced	Protein of unknown function, DUF584
AT2G28420	×	down	Induced	Lactoylglutathione lyase / glyoxalase I family protein
AT2G28440	×	up	Repressed	proline-rich family protein
AT2G28490	down	down	Induced	RmlC-like cupins superfamily protein
AT2G28630	down	down	Induced	3-ketoacyl-CoA synthase 12 (KCS12)
AT2G28650	up	×	Repressed	exocyst subunit exo70 family protein H8 (EXO70H8)
AT2G28710	down	×	Induced	C2H2-type zinc finger family protein
AT2G28780	down	×	Induced	unknown protein
AT2G29260	×	up	Repressed	NAD(P)-binding Rossmann-fold superfamily protein
AT2G29320	up	up	Repressed	NAD(P)-binding Rossmann-fold superfamily protein
AT2G29360	up	up	Repressed	NAD(P)-binding Rossmann-fold superfamily protein
AT2G29380	×	down	Induced	highly ABA-induced PP2C gene 3 (HAI3)
AT2G29440	down	down	Induced	glutathione S-transferase tau 6 (GSTU6)
AT2G29460	×	down	Induced	glutathione S-transferase tau 4 (GSTU4)
AT2G29480	×	down	Induced	glutathione S-transferase tau 2 (GSTU2)
AT2G29720	down	×	Induced	CTF2B
AT2G30520	up	up	Repressed	ROOT PHOTOTROPISM 2 (RPT2)
AT2G30540	up	up	Repressed	Thioredoxin superfamily protein
AT2G30570	up	up	Repressed	photosystem II reaction center W (PSBW)
AT2G31070	×	up	Repressed	TCP domain protein 10 (TCP10)
AT2G31085	down	down	Induced	CLAVATA3/ESR-RELATED 6 (CLE6)
AT2G31141	up	×	Repressed	unknown protein
AT2G31380	×	up	Repressed	salt tolerance homologue (STH)
AT2G31790	×	up	Repressed	UDP-Glycosyltransferase superfamily protein
AT2G31945	down	×	Induced	unknown protein
AT2G31980	down	down	Induced	PHYTOCYSTATIN 2 (CYS2)
AT2G31985	down	×	Induced	Protein of unknown function (DUF1264)
AT2G32100	×	up	Repressed	ovate family protein 16 (OFP16)
AT2G32140	×	down	Induced	transmembrane receptors
AT2G32150	down	down	Induced	Haloacid dehalogenase-like hydrolase (HAD) superfamily protein
AT2G32220	×	up	Repressed	Ribosomal L27e protein family
AT2G32430	×	down	Induced	Galactosyltransferase family protein
AT2G32510	up	×	Repressed	mitogen-activated protein kinase kinase kinase 17 (MAPKKK17)
AT2G32550	×	up	Repressed	Cell differentiation, Rcd1-like protein
AT2G32610	×	down	Induced	cellulose synthase-like B1 (CSLB01)
AT2G32880	×	up	Repressed	TRAF-like family protein
AT2G32990	×	down	Induced	glycosyl hydrolase 9B8 (GH9B8)
AT2G33070	down	down	Induced	nitrile specifier protein 2 (NSP2)
AT2G33380	×	down	Induced	RESPONSIVE TO DESSICATION 20 (RD20)
AT2G33400	×	up	Repressed	unknown protein
AT2G33790	up	up	Repressed	arabinogalactan protein 30 (AGP30)
AT2G33830	down	down	Induced	Dormancy/auxin associated family protein
AT2G33847	×	up	Repressed	unknown protein
AT2G33880	×	down	Induced	homeobox-3 (HB-3)
AT2G34020	×	down	Induced	Calcium-binding EF-hand family protein
AT2G34070	×	down	Induced	TRICHOME BIREFRINGENCE-LIKE 37 (TBL37)
AT2G34240	down	×	Induced	Protein with domains of unknown function DUF627 and DUF632
AT2G34315	×	down	Induced	Avirulence induced gene (AIG1) family protein
AT2G34420	up	up	Repressed	photosystem II light harvesting complex gene B1B2 (LHB1B2)
AT2G34430	up	up	Repressed	light-harvesting chlorophyll-protein complex II subunit B1 (LHB1B1)
AT2G34490	up	up	Repressed	cytochrome P450, family 710, subfamily A, polypeptide 2 (CYP710A2)
AT2G34510	×	up	Repressed	FUNCTIONS IN: molecular_function unknown
AT2G34540	×	up	Repressed	unknown protein
AT2G34610	×	down	Induced	unknown protein
AT2G34620	up	up	Repressed	Mitochondrial transcription termination factor family protein
AT2G34810	up	up	Repressed	FAD-binding Berberine family protein
AT2G35170	×	down	Induced	Histone H3 K4-specific methyltransferase SET7/9 family protein
AT2G35210	×	down	Induced	root and pollen arfgap (RPA)
AT2G35260	×	up	Repressed	unknown protein
AT2G35760	×	down	Induced	Uncharacterised protein family (UPF0497)
AT2G35960	up	up	Repressed	NDR1/HIN1-like 12 (NHL12)
AT2G35980	×	up	Repressed	YELLOW-LEAF-SPECIFIC GENE 9 (YLS9)
AT2G36145	up	×	Repressed	unknown protein
AT2G36270	×	down	Induced	ABA INSENSITIVE 5 (ABI5)
AT2G36590	×	up	Repressed	proline transporter 3 (ProT3)
AT2G36640	×	down	Induced	embryonic cell protein 63 (ECP63)
AT2G37280	×	down	Induced	pleiotropic drug resistance 5 (PDR5)
AT2G37390	up	up	Repressed	Chloroplast-targeted copper chaperone protein
AT2G37440	×	up	Repressed	DNAse I-like superfamily protein
AT2G37678	×	down	Induced	far-red elongated hypocotyl 1 (FHY1)
AT2G37720	×	up	Repressed	TRICHOME BIREFRINGENCE-LIKE 15 (TBL15)
AT2G37930	×	down	Induced	Protein of unknown function (DUF3527)
AT2G38340	×	up	Repressed	Integrase-type DNA-binding superfamily protein
AT2G38380	up	up	Repressed	Peroxidase superfamily protein
AT2G38400	down	down	Induced	alanine:glyoxylate aminotransferase 3 (AGT3)
AT2G38500	×	down	Induced	2-oxoglutarate (2OG) and Fe(II)-dependent oxygenase superfamily protein
AT2G38530	×	down	Induced	lipid transfer protein 2 (LTP2)
AT2G38540	up	up	Repressed	lipid transfer protein 1 (LP1)
AT2G38620	×	up	Repressed	cyclin-dependent kinase B1
AT2G39040	up	up	Repressed	Peroxidase superfamily protein
AT2G39220	up	up	Repressed	PATATIN-like protein 6 (PLP6)
AT2G39250	up	up	Repressed	SCHNARCHZAPFEN (SNZ)
AT2G39310	up	×	Repressed	jacalin-related lectin 22
AT2G39350	×	down	Induced	ABC-2 type transporter family protein
AT2G39380	×	down	Induced	exocyst subunit exo70 family protein H2 (EXO70H2)
AT2G39400	down	down	Induced	alpha/beta-Hydrolases superfamily protein
AT2G39510	×	up	Repressed	nodulin MtN21 /EamA-like transporter family protein
AT2G39560	up	up	Repressed	Putative membrane lipoprotein
AT2G39730	×	up	Repressed	rubisco activase (RCA)
AT2G39800	×	up	Repressed	delta1-pyrroline-5-carboxylate synthase 1 (P5CS1)
AT2G39855	down	×	Induced	unknown protein
AT2G40000	down	down	Induced	ortholog of sugar beet HS1 PRO-1 2 (HSPRO2)
AT2G40020	×	up	Repressed	Nucleolar histone methyltransferase-related protein
AT2G40170	×	down	Induced	LATE EMBRYOGENESIS ABUNDANT 6 (GEA6)
AT2G40420	down	down	Induced	Transmembrane amino acid transporter family protein
AT2G40435	×	up	Repressed	BEST Arabidopsis thaliana protein match is: transcription regulators (TAIR:AT3G56220.1)
AT2G40520	×	up	Repressed	Nucleotidyltransferase family protein
AT2G40610	×	down	Induced	expansin A8 (EXPA8)
AT2G40670	×	up	Repressed	response regulator 16 (RR16)
AT2G40960	up	×	Repressed	Single-stranded nucleic acid binding R3H protein
AT2G41010	×	down	Induced	calmodulin (CAM)-binding protein of 25 kDa (CAMBP25)
AT2G41070	down	down	Induced	ENHANCED EM LEVEL (EEL)
AT2G41260	down	down	Induced	M17
AT2G41280	×	down	Induced	M10
AT2G41850	down	down	Induced	polygalacturonase abscission zone A. thaliana (PGAZAT)
AT2G41990	up	up	Repressed	CONTAINS InterPro DOMAIN/s: Late embryogenesis abundant protein, group 2 (InterPro:IPR004864)
AT2G42010	×	down	Induced	phospholipase D beta 1 (PLDBETA1)
AT2G42220	up	up	Repressed	Rhodanese/Cell cycle control phosphatase superfamily protein
AT2G42560	down	down	Induced	late embryogenesis abundant domain-containing protein / LEA domain-containing protein
AT2G42870	×	down	Induced	PHY RAPIDLY REGULATED 1 (PAR1)
AT2G43050	×	down	Induced	ATPMEPCRD
AT2G43100	up	×	Repressed	isopropylmalate isomerase 2 (IPMI2)
AT2G43480	up	×	Repressed	Peroxidase superfamily protein
AT2G43550	up	up	Repressed	Scorpion toxin-like knottin superfamily protein
AT2G43600	up	up	Repressed	Chitinase family protein
AT2G43800	×	up	Repressed	Actin-binding FH2 (formin homology 2) family protein
AT2G43880	up	×	Repressed	Pectin lyase-like superfamily protein
AT2G44220	×	down	Induced	Protein of Unknown Function (DUF239)
AT2G44290	×	up	Repressed	Bifunctional inhibitor/lipid-transfer protein/seed storage 2S albumin superfamily protein
AT2G44630	up	×	Repressed	Galactose oxidase/kelch repeat superfamily protein
AT2G44910	down	×	Induced	homeobox-leucine zipper protein 4 (HB4)
AT2G45210	×	down	Induced	SAUR-like auxin-responsive protein family
AT2G45685	up	×	Repressed	other RNA
AT2G46270	×	down	Induced	G-box binding factor 3 (GBF3)
AT2G46535	×	up	Repressed	unknown protein
AT2G46600	×	down	Induced	Calcium-binding EF-hand family protein
AT2G46640	up	up	Repressed	unknown protein
AT2G46660	×	down	Induced	cytochrome P450, family 78, subfamily A, polypeptide 6 (CYP78A6)
AT2G46750	×	down	Induced	D-arabinono-1,4-lactone oxidase family protein
AT2G46950	×	down	Induced	cytochrome P450, family 709, subfamily B, polypeptide 2 (CYP709B2)
AT2G46970	down	down	Induced	phytochrome interacting factor 3-like 1 (PIL1)
AT2G47050	up	×	Repressed	Plant invertase/pectin methylesterase inhibitor superfamily protein
AT2G47160	×	down	Induced	REQUIRES HIGH BORON 1 (BOR1)
AT2G47270	down	down	Induced	sequence-specific DNA binding transcription factors
AT2G47370	×	up	Repressed	Calcium-dependent phosphotriesterase superfamily protein
AT2G47450	×	up	Repressed	CHAOS (CAO)
AT2G47520	×	up	Repressed	HYPOXIA RESPONSIVE ERF (ETHYLENE RESPONSE FACTOR) 2 (HRE2)
AT2G47750	×	up	Repressed	putative indole-3-acetic acid-amido synthetase GH3.9 (GH3.9)
AT2G47770	down	down	Induced	TSPO(outer membrane tryptophan-rich sensory protein)-related (TSPO)
AT3G01220	×	down	Induced	homeobox protein 20 (HB20)
AT3G01500	up	up	Repressed	carbonic anhydrase 1 (CA1)
AT3G01570	down	down	Induced	Oleosin family protein
AT3G01920	×	up	Repressed	DHBP synthase RibB-like alpha/beta domain
AT3G02020	×	up	Repressed	aspartate kinase 3 (AK3)
AT3G02040	×	down	Induced	senescence-related gene 3 (SRG3)
AT3G02380	×	up	Repressed	CONSTANS-like 2 (COL2)
AT3G02670	up	up	Repressed	Glycine-rich protein family
AT3G02730	×	up	Repressed	thioredoxin F-type 1 (TRXF1)
AT3G02830	×	up	Repressed	zinc finger protein 1 (ZFN1)
AT3G02885	×	up	Repressed	GAST1 protein homolog 5 (GASA5)
AT3G03130	up	up	Repressed	unknown protein
AT3G03240	×	down	Induced	alpha/beta-Hydrolases superfamily protein
AT3G03341	up	×	Repressed	unknown protein
AT3G03620	down	×	Induced	MATE efflux family protein
AT3G03910	×	down	Induced	glutamate dehydrogenase 3 (GDH3)
AT3G04000	up	×	Repressed	NAD(P)-binding Rossmann-fold superfamily protein
AT3G04010	×	down	Induced	O-Glycosyl hydrolases family 17 protein
AT3G04290	up	up	Repressed	Li-tolerant lipase 1 (LTL1)
AT3G04770	up	up	Repressed	40s ribosomal protein SA B (RPSAb)
AT3G04800	×	up	Repressed	translocase inner membrane subunit 23-3 (TIM23-3)
AT3G05150	×	down	Induced	Major facilitator superfamily protein
AT3G05152	×	down	Induced	other RNA
AT3G05260	down	down	Induced	NAD(P)-binding Rossmann-fold superfamily protein
AT3G05340	×	up	Repressed	Tetratricopeptide repeat (TPR)-like superfamily protein
AT3G05600	up	up	Repressed	alpha/beta-Hydrolases superfamily protein
AT3G05640	down	×	Induced	Protein phosphatase 2C family protein
AT3G05660	×	down	Induced	receptor like protein 33 (RLP33)
AT3G05730	up	up	Repressed	LOCATED IN: endomembrane system
AT3G05900	×	down	Induced	neurofilament protein-related
AT3G05920	×	down	Induced	Heavy metal transport/detoxification superfamily protein
AT3G06020	×	up	Repressed	Protein of unknown function (DUF3049)
AT3G06455	×	down	Induced	ubiquitin family protein
AT3G06680	up	up	Repressed	Ribosomal L29e protein family
AT3G06850	×	down	Induced	BCE2
AT3G06880	×	up	Repressed	Transducin/WD40 repeat-like superfamily protein
AT3G07380	×	down	Induced	Domain of unknown function (DUF23)
AT3G08860	down	down	Induced	PYRIMIDINE 4 (PYD4)
AT3G08920	up	×	Repressed	Rhodanese/Cell cycle control phosphatase superfamily protein
AT3G08940	up	up	Repressed	light harvesting complex photosystem II (LHCB4.2)
AT3G09680	×	up	Repressed	Ribosomal protein S12/S23 family protein
AT3G10040	×	up	Repressed	sequence-specific DNA binding transcription factors
AT3G10290	×	down	Induced	Nucleotide-sugar transporter family protein
AT3G10520	×	up	Repressed	haemoglobin 2 (HB2)
AT3G10570	×	up	Repressed	cytochrome P450, family 77, subfamily A, polypeptide 6 (CYP77A6)
AT3G10870	×	up	Repressed	methyl esterase 17 (MES17)
AT3G10985	×	down	Induced	senescence associated gene 20 (SAG20)
AT3G11050	×	down	Induced	ferritin 2 (FER2)
AT3G11090	up	×	Repressed	LOB domain-containing protein 21 (LBD21)
AT3G11570	×	down	Induced	TRICHOME BIREFRINGENCE-LIKE 8 (TBL8)
AT3G11840	×	down	Induced	plant U-box 24 (PUB24)
AT3G12240	up	×	Repressed	serine carboxypeptidase-like 15 (SCPL15)
AT3G12820	×	down	Induced	myb domain protein 10 (MYB10)
AT3G12870	×	up	Repressed	unknown protein
AT3G12981	×	up	Repressed	pseudogene of F-box family protein
AT3G13650	×	up	Repressed	Disease resistance-responsive (dirigent-like protein) family protein
AT3G14210	up	up	Repressed	epithiospecifier modifier 1 (ESM1)
AT3G14260	×	down	Induced	Protein of unknown function (DUF567)
AT3G14440	×	down	Induced	nine-cis-epoxycarotenoid dioxygenase 3 (NCED3)
AT3G14530	up	×	Repressed	Terpenoid synthases superfamily protein
AT3G14540	×	up	Repressed	Terpenoid cyclases/Protein prenyltransferases superfamily protein
AT3G14670	×	down	Induced	unknown protein
AT3G14735	×	up	Repressed	gi|16516|emb|X52527.1|ATSNU61 Arabidopsis thaliana U6-1 snRNA gene
AT3G14760	up	up	Repressed	unknown protein
AT3G14770	×	up	Repressed	Nodulin MtN3 family protein
AT3G14880	×	down	Induced	BEST Arabidopsis thaliana protein match is: transcription factor-related (TAIR:AT4G18650.1)
AT3G15280	up	×	Repressed	unknown protein
AT3G15450	down	down	Induced	Aluminium induced protein with YGL and LRDR motifs
AT3G15500	down	down	Induced	NAC domain containing protein 3 (NAC3)
AT3G15540	×	down	Induced	indole-3-acetic acid inducible 19 (IAA19)
AT3G15550	×	up	Repressed	unknown protein
AT3G15570	×	up	Repressed	Phototropic-responsive NPH3 family protein
AT3G15620	×	down	Induced	UV REPAIR DEFECTIVE 3 (UVR3)
AT3G15650	×	up	Repressed	alpha/beta-Hydrolases superfamily protein
AT3G15670	×	down	Induced	Late embryogenesis abundant protein (LEA) family protein
AT3G15680	×	up	Repressed	Ran BP2/NZF zinc finger-like superfamily protein
AT3G15780	×	down	Induced	unknown protein
AT3G15850	×	up	Repressed	fatty acid desaturase 5 (FAD5)
AT3G16120	down	down	Induced	Dynein light chain type 1 family protein
AT3G16140	up	×	Repressed	photosystem I subunit H-1 (PSAH-1)
AT3G16360	×	up	Repressed	HPT phosphotransmitter 4 (AHP4)
AT3G16410	up	×	Repressed	nitrile specifier protein 4 (NSP4)
AT3G16520	up	up	Repressed	UDP-glucosyl transferase 88A1 (UGT88A1)
AT3G16660	up	up	Repressed	Pollen Ole e 1 allergen and extensin family protein
AT3G16670	×	up	Repressed	Pollen Ole e 1 allergen and extensin family protein
AT3G17040	×	up	Repressed	high chlorophyll fluorescent 107 (HCF107)
AT3G17050	×	down	Induced	pseudogene, glycine-rich protein, similar to glycine-rich protein TIGR:At1g53620.1 (Arabidopsis thaliana)
AT3G17100	×	down	Induced	sequence-specific DNA binding transcription factors
AT3G17110	×	down	Induced	pseudogene, glycine-rich protein
AT3G17520	×	down	Induced	Late embryogenesis abundant protein (LEA) family protein
AT3G17580	×	down	Induced	unknown protein
AT3G18530	×	down	Induced	ARM repeat superfamily protein
AT3G18570	×	down	Induced	Oleosin family protein
AT3G18773	×	down	Induced	RING/U-box superfamily protein
AT3G18890	×	up	Repressed	NAD(P)-binding Rossmann-fold superfamily protein
AT3G18900	×	up	Repressed	FUNCTIONS IN: molecular_function unknown
AT3G18950	×	down	Induced	Transducin/WD40 repeat-like superfamily protein
AT3G19300	×	up	Repressed	Protein kinase superfamily protein
AT3G19430	up	up	Repressed	late embryogenesis abundant protein-related / LEA protein-related
AT3G19480	up	up	Repressed	D-3-phosphoglycerate dehydrogenase
AT3G19580	×	down	Induced	zinc-finger protein 2 (ZF2)
AT3G19710	up	up	Repressed	branched-chain aminotransferase4 (BCAT4)
AT3G20160	×	up	Repressed	Terpenoid synthases superfamily protein
AT3G20340	×	down	Induced	FUNCTIONS IN: molecular_function unknown
AT3G20370	×	up	Repressed	TRAF-like family protein
AT3G20470	×	down	Induced	glycine-rich protein 5 (GRP5)
AT3G20600	×	up	Repressed	non race-specific disease resistance 1 (NDR1)
AT3G20660	×	down	Induced	organic cation/carnitine transporter4 (4-Oct)
AT3G20810	×	down	Induced	2-oxoglutarate (2OG) and Fe(II)-dependent oxygenase superfamily protein
AT3G20940	×	up	Repressed	cytochrome P450, family 705, subfamily A, polypeptide 30 (CYP705A30)
AT3G21055	up	up	Repressed	photosystem II subunit T (PSBTN)
AT3G21090	×	down	Induced	ABC-2 type transporter family protein
AT3G21330	×	down	Induced	basic helix-loop-helix (bHLH) DNA-binding superfamily protein
AT3G21370	down	×	Induced	beta glucosidase 19 (BGLU19)
AT3G21670	down	down	Induced	Major facilitator superfamily protein
AT3G21760	up	up	Repressed	HYPOSTATIN RESISTANCE 1 (HYR1)
AT3G21950	up	up	Repressed	S-adenosyl-L-methionine-dependent methyltransferases superfamily protein
AT3G22090	×	up	Repressed	unknown protein
AT3G22460	down	×	Induced	O-acetylserine (thiol) lyase (OAS-TL) isoform A2 (OASA2)
AT3G22550	up	up	Repressed	Protein of unknown function (DUF581)
AT3G22640	down	×	Induced	PAP85
AT3G22840	×	down	Induced	EARLY LIGHT-INDUCABLE PROTEIN (ELIP1)
AT3G23050	×	down	Induced	indole-3-acetic acid 7 (IAA7)
AT3G23210	×	up	Repressed	basic Helix-Loop-Helix 34 (bHLH34)
AT3G23250	×	down	Induced	myb domain protein 15 (MYB15)
AT3G23410	×	up	Repressed	fatty alcohol oxidase 3 (FAO3)
AT3G24450	×	down	Induced	Heavy metal transport/detoxification superfamily protein
AT3G24715	down	down	Induced	Protein kinase superfamily protein with octicosapeptide/Phox/Bem1p domain
AT3G24780	up	×	Repressed	Uncharacterised conserved protein UCP015417, vWA
AT3G24927	×	down	Induced	expressed protein
AT3G25020	up	×	Repressed	receptor like protein 42 (RLP42)
AT3G25260	down	×	Induced	Major facilitator superfamily protein
AT3G25730	down	down	Induced	ethylene response DNA binding factor 3 (EDF3)
AT3G25770	×	up	Repressed	allene oxide cyclase 2 (AOC2)
AT3G25790	up	up	Repressed	myb-like transcription factor family protein
AT3G26050	×	up	Repressed	TPX2 (targeting protein for Xklp2) protein family
AT3G26165	×	down	Induced	pseudogene, cytochrome P450, potential frameshift mutation
AT3G26510	×	down	Induced	Octicosapeptide/Phox/Bem1p family protein
AT3G26570	×	up	Repressed	phosphate transporter 2
AT3G27070	up	×	Repressed	translocase outer membrane 20-1 (TOM20-1)
AT3G27250	×	down	Induced	unknown protein
AT3G27690	up	up	Repressed	photosystem II light harvesting complex gene 2.3 (LHCB2.3)
AT3G28070	×	up	Repressed	nodulin MtN21 /EamA-like transporter family protein
AT3G28340	×	down	Induced	galacturonosyltransferase-like 10 (GATL10)
AT3G28740	×	down	Induced	CYP81D1
AT3G28857	down	down	Induced	basic helix-loop-helix (bHLH) DNA-binding family protein
AT3G29410	×	down	Induced	Terpenoid cyclases/Protein prenyltransferases superfamily protein
AT3G29575	down	down	Induced	ABI five binding protein 3 (AFP3)
AT3G29680	up	up	Repressed	HXXXD-type acyl-transferase family protein
AT3G30180	×	down	Induced	brassinosteroid-6-oxidase 2 (BR6OX2)
AT3G30720	up	up	Repressed	QUA-QUINE STARCH (QQS)
AT3G30775	down	down	Induced	EARLY RESPONSIVE TO DEHYDRATION 5 (ERD5)
AT3G42658	×	down	Induced	transposable element gene
AT3G42725	up	up	Repressed	Putative membrane lipoprotein
AT3G43110	×	up	Repressed	unknown protein
AT3G43190	×	up	Repressed	sucrose synthase 4 (SUS4)
AT3G43270	×	down	Induced	Plant invertase/pectin methylesterase inhibitor superfamily
AT3G43715	×	up	Repressed	pseudogene, hypothetical protein, similar to putative non-LTR retroelement reverse transcriptase
AT3G44290	×	down	Induced	NAC domain containing protein 60 (NAC060)
AT3G44320	×	up	Repressed	nitrilase 3 (NIT3)
AT3G44540	×	up	Repressed	fatty acid reductase 4 (FAR4)
AT3G45070	up	up	Repressed	P-loop containing nucleoside triphosphate hydrolases superfamily protein
AT3G45680	up	up	Repressed	Major facilitator superfamily protein
AT3G45730	×	down	Induced	unknown protein
AT3G46490	×	up	Repressed	2-oxoglutarate (2OG) and Fe(II)-dependent oxygenase superfamily protein
AT3G46780	up	up	Repressed	plastid transcriptionally active 16 (PTAC16)
AT3G46870	×	up	Repressed	Pentatricopeptide repeat (PPR) superfamily protein
AT3G46900	up	up	Repressed	copper transporter 2 (COPT2)
AT3G47220	×	down	Induced	phosphatidylinositol-speciwc phospholipase C9 (PLC9)
AT3G47250	×	up	Repressed	Plant protein of unknown function (DUF247)
AT3G47340	down	down	Induced	glutamine-dependent asparagine synthase 1 (ASN1)
AT3G47470	up	up	Repressed	light-harvesting chlorophyll-protein complex I subunit A4 (LHCA4)
AT3G48240	×	down	Induced	Octicosapeptide/Phox/Bem1p family protein
AT3G48260	down	down	Induced	with no lysine (K) kinase 3 (WNK3)
AT3G48280	up	×	Repressed	cytochrome P450, family 71, subfamily A, polypeptide 25 (CYP71A25)
AT3G48340	×	up	Repressed	Cysteine proteinases superfamily protein
AT3G48350	up	up	Repressed	Cysteine proteinases superfamily protein
AT3G48390	down	down	Induced	MA3 domain-containing protein
AT3G48480	up	×	Repressed	Cysteine proteinases superfamily protein
AT3G48720	up	up	Repressed	HXXXD-type acyl-transferase family protein
AT3G49360	×	down	Induced	6-phosphogluconolactonase 2 (PGL2)
AT3G50070	×	up	Repressed	CYCLIN D3
AT3G50270	up	up	Repressed	HXXXD-type acyl-transferase family protein
AT3G50685	×	up	Repressed	unknown protein
AT3G50770	down	down	Induced	calmodulin-like 41 (CML41)
AT3G50820	up	up	Repressed	photosystem II subunit O-2 (PSBO2)
AT3G50870	up	×	Repressed	MONOPOLE (MNP)
AT3G51240	×	up	Repressed	flavanone 3-hydroxylase (F3H)
AT3G51480	up	×	Repressed	glutamate receptor 3.6 (GLR3.6)
AT3G51810	down	down	Induced	LATE EMBRYOGENESIS ABUNDANT 1 (EM1)
AT3G51870	×	up	Repressed	Mitochondrial substrate carrier family protein
AT3G51895	×	down	Induced	sulfate transporter 3
AT3G52525	×	up	Repressed	ovate family protein 6 (OFP6)
AT3G52540	×	up	Repressed	ovate family protein 18 (OFP18)
AT3G52840	down	×	Induced	beta-galactosidase 2 (BGAL2)
AT3G53040	×	down	Induced	late embryogenesis abundant protein, putative / LEA protein, putative
AT3G53190	×	up	Repressed	Pectin lyase-like superfamily protein
AT3G53200	down	down	Induced	myb domain protein 27 (MYB27)
AT3G54000	×	down	Induced	CONTAINS InterPro DOMAIN/s: Uncharacterised conserved protein UCP022260 (InterPro:IPR016802)
AT3G54510	×	down	Induced	Early-responsive to dehydration stress protein (ERD4)
AT3G54600	up	up	Repressed	Class I glutamine amidotransferase-like superfamily protein
AT3G54710	×	up	Repressed	homolog of yeast CDT1 B homolog of yeast CDT1 B (CDT1B)
AT3G54830	down	down	Induced	Transmembrane amino acid transporter family protein
AT3G54890	up	up	Repressed	photosystem I light harvesting complex gene 1 (LHCA1)
AT3G54900	×	up	Repressed	CAX interacting protein 1 (CXIP1)
AT3G54940	×	down	Induced	Papain family cysteine protease
AT3G55110	×	up	Repressed	ABC-2 type transporter family protein
AT3G55120	up	up	Repressed	TRANSPARENT TESTA 5 (TT5)
AT3G55240	down	×	Induced	FUNCTIONS IN: molecular_function unknown
AT3G55610	×	down	Induced	delta 1-pyrroline-5-carboxylate synthase 2 (P5CS2)
AT3G55710	×	up	Repressed	UDP-Glycosyltransferase superfamily protein
AT3G55940	×	down	Induced	Phosphoinositide-specific phospholipase C family protein
AT3G55970	×	up	Repressed	jasmonate-regulated gene 21 (JRG21)
AT3G56080	up	up	Repressed	S-adenosyl-L-methionine-dependent methyltransferases superfamily protein
AT3G56210	down	down	Induced	ARM repeat superfamily protein
AT3G56220	×	up	Repressed	transcription regulators
AT3G56350	down	×	Induced	Iron/manganese superoxide dismutase family protein
AT3G56730	×	up	Repressed	Putative endonuclease or glycosyl hydrolase
AT3G56940	up	up	Repressed	COPPER RESPONSE DEFECT 1 (CRD1)
AT3G57160	×	up	Repressed	unknown protein
AT3G58450	down	×	Induced	Adenine nucleotide alpha hydrolases-like superfamily protein
AT3G58850	×	down	Induced	PHY RAPIDLY REGULATED 2 (PAR2)
AT3G58990	up	up	Repressed	isopropylmalate isomerase 1 (IPMI1)
AT3G59060	down	down	Induced	phytochrome interacting factor 3-like 6 (PIL6)
AT3G59200	×	up	Repressed	F-box/RNI-like superfamily protein
AT3G59250	up	up	Repressed	F-box/RNI-like superfamily protein
AT3G59340	up	up	Repressed	Eukaryotic protein of unknown function (DUF914)
AT3G59370	×	down	Induced	Vacuolar calcium-binding protein-related
AT3G59400	up	up	Repressed	GENOMES UNCOUPLED 4 (GUN4)
AT3G59690	×	down	Induced	IQ-domain 13 (IQD13)
AT3G60140	down	down	Induced	DARK INDUCIBLE 2 (DIN2)
AT3G60520	×	down	Induced	unknown protein
AT3G60900	×	up	Repressed	FASCICLIN-like arabinogalactan-protein 10 (FLA10)
AT3G61060	down	down	Induced	phloem protein 2-A13 (PP2-A13)
AT3G61250	×	up	Repressed	myb domain protein 17 (MYB17)
AT3G61470	up	up	Repressed	photosystem I light harvesting complex gene 2 (LHCA2)
AT3G61680	×	down	Induced	alpha/beta-Hydrolases superfamily protein
AT3G61820	×	up	Repressed	Eukaryotic aspartyl protease family protein
AT3G61830	×	down	Induced	auxin response factor 18 (ARF18)
AT3G61920	up	up	Repressed	unknown protein
AT3G61950	×	up	Repressed	basic helix-loop-helix (bHLH) DNA-binding superfamily protein
AT3G62090	down	down	Induced	phytochrome interacting factor 3-like 2 (PIL2)
AT3G63350	down	down	Induced	AT-HSFA7B
AT4G00165	up	up	Repressed	Bifunctional inhibitor/lipid-transfer protein/seed storage 2S albumin superfamily protein
AT4G00880	up	up	Repressed	SAUR-like auxin-responsive protein family
AT4G00910	down	×	Induced	Aluminium activated malate transporter family protein
AT4G00950	×	up	Repressed	maternal effect embryo arrest 47 (MEE47)
AT4G01250	×	down	Induced	WRKY22
AT4G01335	down	down	Induced	FUNCTIONS IN: molecular_function unknown
AT4G01510	×	down	Induced	ARV2
AT4G01515	×	down	Induced	non-LTR retrotransposon family (LINE), has a 1.1e-18 P-value blast match to GB:AAB41224 ORF2 (LINE-element) (Rattus norvegicus)
AT4G01525	×	down	Induced	transposable element gene
AT4G01730	up	×	Repressed	DHHC-type zinc finger family protein
AT4G01890	×	up	Repressed	Pectin lyase-like superfamily protein
AT4G01915	×	up	Repressed	unknown protein
AT4G02290	×	down	Induced	glycosyl hydrolase 9B13 (GH9B13)
AT4G02630	×	up	Repressed	Protein kinase superfamily protein
AT4G02690	down	down	Induced	Bax inhibitor-1 family protein
AT4G02770	up	up	Repressed	photosystem I subunit D-1 (PSAD-1)
AT4G02800	up	up	Repressed	unknown protein
AT4G02850	up	up	Repressed	phenazine biosynthesis PhzC/PhzF family protein
AT4G03100	up	up	Repressed	Rho GTPase activating protein with PAK-box/P21-Rho-binding domain
AT4G03150	×	up	Repressed	unknown protein
AT4G04220	×	down	Induced	receptor like protein 46 (RLP46)
AT4G04570	×	up	Repressed	cysteine-rich RLK (RECEPTOR-like protein kinase) 40 (CRK40)
AT4G04840	up	up	Repressed	methionine sulfoxide reductase B6 (MSRB6)
AT4G04850	×	up	Repressed	K+ efflux antiporter 3 (KEA3)
AT4G04990	×	down	Induced	Protein of unknown function (DUF761)
AT4G05180	up	up	Repressed	photosystem II subunit Q-2 (PSBQ-2)
AT4G05440	×	up	Repressed	embryo sac development arrest 35 (EDA35)
AT4G06498	×	down	Induced	pseudogene, vacuolar sorting receptor -related, similar to BP-80 vacuolar sorting receptor GP:1737222 {Pisum sativum}
AT4G08620	up	up	Repressed	sulphate transporter 1
AT4G09500	up	up	Repressed	UDP-Glycosyltransferase superfamily protein
AT4G09600	down	down	Induced	GAST1 protein homolog 3 (GASA3)
AT4G09610	down	down	Induced	GAST1 protein homolog 2 (GASA2)
AT4G09650	×	up	Repressed	ATP synthase delta-subunit gene (ATPD)
AT4G09760	×	down	Induced	Protein kinase superfamily protein
AT4G10020	down	down	Induced	hydroxysteroid dehydrogenase 5 (HSD5)
AT4G10150	down	×	Induced	RING/U-box superfamily protein
AT4G10160	down	down	Induced	RING/U-box superfamily protein
AT4G10240	×	down	Induced	B-box zinc finger family protein
AT4G10250	×	down	Induced	ATHSP22.0
AT4G10340	up	up	Repressed	light harvesting complex of photosystem II 5 (LHCB5)
AT4G11000	down	×	Induced	Ankyrin repeat family protein
AT4G11050	×	down	Induced	glycosyl hydrolase 9C3 (GH9C3)
AT4G11140	up	×	Repressed	cytokinin response factor 1 (CRF1)
AT4G11210	up	up	Repressed	Disease resistance-responsive (dirigent-like protein) family protein
AT4G11320	×	up	Repressed	Papain family cysteine protease
AT4G11460	up	up	Repressed	cysteine-rich RLK (RECEPTOR-like protein kinase) 30 (CRK30)
AT4G11610	×	down	Induced	C2 calcium/lipid-binding plant phosphoribosyltransferase family protein
AT4G11650	down	down	Induced	osmotin 34 (OSM34)
AT4G11780	×	up	Repressed	unknown protein
AT4G12030	×	up	Repressed	bile acid transporter 5 (BAT5)
AT4G12310	up	up	Repressed	cytochrome P450, family 706, subfamily A, polypeptide 5 (CYP706A5)
AT4G12480	×	down	Induced	pEARLI 1
AT4G12520	×	down	Induced	Bifunctional inhibitor/lipid-transfer protein/seed storage 2S albumin superfamily protein
AT4G12800	up	up	Repressed	photosystem I subunit l (PSAL)
AT4G12870	×	up	Repressed	Gamma interferon responsive lysosomal thiol (GILT) reductase family protein
AT4G13090	down	×	Induced	xyloglucan endotransglucosylase/hydrolase 2 (XTH2)
AT4G13210	×	down	Induced	Pectin lyase-like superfamily protein
AT4G13310	down	down	Induced	cytochrome P450, family 71, subfamily A, polypeptide 20 (CYP71A20)
AT4G13495	up	up	Repressed	other RNA
AT4G13540	×	down	Induced	unknown protein
AT4G13680	×	up	Repressed	Protein of unknown function (DUF295)
AT4G13690	×	up	Repressed	unknown protein
AT4G13770	up	up	Repressed	cytochrome P450, family 83, subfamily A, polypeptide 1 (CYP83A1)
AT4G13790	down	down	Induced	SAUR-like auxin-responsive protein family
AT4G13830	×	down	Induced	DNAJ-like 20 (J20)
AT4G14130	down	down	Induced	xyloglucan endotransglucosylase/hydrolase 15 (XTH15)
AT4G14330	×	up	Repressed	P-loop containing nucleoside triphosphate hydrolases superfamily protein
AT4G14380	×	down	Induced	unknown protein
AT4G14465	×	down	Induced	AT-hook motif nuclear-localized protein 20 (AHL20)
AT4G14480	×	up	Repressed	Protein kinase superfamily protein
AT4G14548	×	down	Induced	other RNA
AT4G14580	×	up	Repressed	CBL-interacting protein kinase 4 (CIPK4)
AT4G14723	up	×	Repressed	BEST Arabidopsis thaliana protein match is: allergen-related (TAIR:AT3G22820.1)
AT4G14746	×	down	Induced	CONTAINS InterPro DOMAIN/s: EGF-like (InterPro:IPR006210)
AT4G15360	×	up	Repressed	cytochrome P450, family 705, subfamily A, polypeptide 3 (CYP705A3)
AT4G15610	×	down	Induced	Uncharacterised protein family (UPF0497)
AT4G15620	up	up	Repressed	Uncharacterised protein family (UPF0497)
AT4G15660	up	×	Repressed	Thioredoxin superfamily protein
AT4G15690	up	×	Repressed	Thioredoxin superfamily protein
AT4G15830	×	up	Repressed	ARM repeat superfamily protein
AT4G16000	×	down	Induced	unknown protein
AT4G16260	down	×	Induced	Glycosyl hydrolase superfamily protein
AT4G16670	down	down	Induced	CONTAINS InterPro DOMAIN/s: Pleckstrin-like, plant (InterPro:IPR013666), Protein of unknown function DUF828 (InterPro:IPR008546), Pleckstrin homology (InterPro:IPR001849)
AT4G16770	×	down	Induced	2-oxoglutarate (2OG) and Fe(II)-dependent oxygenase superfamily protein
AT4G16780	down	down	Induced	homeobox protein 2 (HB-2)
AT4G16790	×	down	Induced	hydroxyproline-rich glycoprotein family protein
AT4G17470	up	up	Repressed	alpha/beta-Hydrolases superfamily protein
AT4G18210	×	down	Induced	purine permease 10 (PUP10)
AT4G18440	up	×	Repressed	L-Aspartase-like family protein
AT4G18650	down	down	Induced	transcription factor-related
AT4G18690	down	down	Induced	unknown protein
AT4G18740	×	up	Repressed	Rho termination factor
AT4G19520	up	×	Repressed	disease resistance protein (TIR-NBS-LRR class) family
AT4G19530	×	up	Repressed	disease resistance protein (TIR-NBS-LRR class) family
AT4G19645	×	up	Repressed	TRAM, LAG1 and CLN8 (TLC) lipid-sensing domain containing protein
AT4G20260	×	down	Induced	plasma-membrane associated cation-binding protein 1 (PCAP1)
AT4G20430	×	up	Repressed	Subtilase family protein
AT4G21020	×	down	Induced	Late embryogenesis abundant protein (LEA) family protein
AT4G22214	up	up	Repressed	Defensin-like (DEFL) family protein
AT4G22560	up	up	Repressed	unknown protein
AT4G22570	×	up	Repressed	adenine phosphoribosyl transferase 3 (APT3)
AT4G22690	×	up	Repressed	cytochrome P450, family 706, subfamily A, polypeptide 1 (CYP706A1)
AT4G22753	up	up	Repressed	sterol 4-alpha methyl oxidase 1-3 (SMO1-3)
AT4G23300	×	up	Repressed	cysteine-rich RLK (RECEPTOR-like protein kinase) 22 (CRK22)
AT4G23680	up	up	Repressed	Polyketide cyclase/dehydrase and lipid transport superfamily protein
AT4G23700	down	down	Induced	cation/H+ exchanger 17 (CHX17)
AT4G23870	down	down	Induced	unknown protein
AT4G24140	×	up	Repressed	alpha/beta-Hydrolases superfamily protein
AT4G24150	×	down	Induced	growth-regulating factor 8 (GRF8)
AT4G24230	down	down	Induced	acyl-CoA-binding domain 3 (ACBP3)
AT4G24265	×	up	Repressed	unknown protein
AT4G25010	up	up	Repressed	Nodulin MtN3 family protein
AT4G25050	×	up	Repressed	acyl carrier protein 4 (ACP4)
AT4G25200	×	up	Repressed	mitochondrion-localized small heat shock protein 23.6 (HSP23.6-MITO)
AT4G25260	×	down	Induced	Plant invertase/pectin methylesterase inhibitor superfamily protein
AT4G25390	×	down	Induced	Protein kinase superfamily protein
AT4G25470	×	down	Induced	C-repeat/DRE binding factor 2 (CBF2)
AT4G25580	down	down	Induced	CAP160 protein
AT4G25630	×	up	Repressed	fibrillarin 2 (FIB2)
AT4G25810	×	down	Induced	xyloglucan endotransglycosylase 6 (XTR6)
AT4G26150	×	up	Repressed	cytokinin-responsive gata factor 1 (CGA1)
AT4G26220	×	up	Repressed	S-adenosyl-L-methionine-dependent methyltransferases superfamily protein
AT4G26260	down	down	Induced	myo-inositol oxygenase 4 (MIOX4)
AT4G26600	up	×	Repressed	S-adenosyl-L-methionine-dependent methyltransferases superfamily protein
AT4G26660	up	×	Repressed	INVOLVED IN: biological_process unknown
AT4G26740	down	down	Induced	seed gene 1 (ATS1)
AT4G26780	×	up	Repressed	AR192
AT4G26940	×	down	Induced	Galactosyltransferase family protein
AT4G27030	up	×	Repressed	fatty acid desaturase A (FADA)
AT4G27150	down	×	Induced	seed storage albumin 2 (SESA2)
AT4G27310	×	down	Induced	B-box type zinc finger family protein
AT4G27400	up	up	Repressed	Late embryogenesis abundant (LEA) protein-related
AT4G27460	down	down	Induced	Cystathionine beta-synthase (CBS) family protein
AT4G27520	up	up	Repressed	early nodulin-like protein 2 (ENODL2)
AT4G27570	×	up	Repressed	UDP-Glycosyltransferase superfamily protein
AT4G27670	×	up	Repressed	heat shock protein 21 (HSP21)
AT4G27700	×	up	Repressed	Rhodanese/Cell cycle control phosphatase superfamily protein
AT4G27790	down	down	Induced	Calcium-binding EF hand family protein
AT4G28040	down	down	Induced	nodulin MtN21 /EamA-like transporter family protein
AT4G28140	down	down	Induced	Integrase-type DNA-binding superfamily protein
AT4G28240	×	down	Induced	Wound-responsive family protein
AT4G28430	×	up	Repressed	Reticulon family protein
AT4G28520	down	down	Induced	cruciferin 3 (CRU3)
AT4G28652	×	down	Induced	Potential natural antisense gene, locus overlaps with AT4G28650
AT4G28750	up	up	Repressed	PSA E1 KNOCKOUT (PSAE-1)
AT4G28780	up	up	Repressed	GDSL-like Lipase/Acylhydrolase superfamily protein
AT4G28790	×	down	Induced	basic helix-loop-helix (bHLH) DNA-binding superfamily protein
AT4G29270	×	down	Induced	HAD superfamily, subfamily IIIB acid phosphatase
AT4G29900	×	down	Induced	autoinhibited Ca(2+)-ATPase 10 (ACA10)
AT4G30180	×	down	Induced	sequence-specific DNA binding transcription factors
AT4G30230	×	up	Repressed	unknown protein
AT4G30410	×	down	Induced	sequence-specific DNA binding transcription factors
AT4G30800	×	up	Repressed	Nucleic acid-binding, OB-fold-like protein
AT4G30975	×	down	Induced	other RNA
AT4G31000	down	down	Induced	Calmodulin-binding protein
AT4G31248	×	down	Induced	other RNA
AT4G31320	up	×	Repressed	SAUR-like auxin-responsive protein family
AT4G31370	×	down	Induced	FASCICLIN-like arabinogalactan protein 5 precursor (FLA5)
AT4G31380	×	down	Induced	FPF1-like protein 1 (FLP1)
AT4G31610	×	down	Induced	REPRODUCTIVE MERISTEM 1 (REM1)
AT4G31805	×	up	Repressed	WRKY family transcription factor
AT4G31830	down	down	Induced	unknown protein
AT4G31840	up	up	Repressed	early nodulin-like protein 15 (ENODL15)
AT4G32280	down	down	Induced	indole-3-acetic acid inducible 29 (IAA29)
AT4G32460	×	down	Induced	FUNCTIONS IN: molecular_function unknown
AT4G32500	down	down	Induced	K+ transporter 5 (KT5)
AT4G32540	×	up	Repressed	YUCCA 1 (YUC1)
AT4G32950	×	down	Induced	Protein phosphatase 2C family protein
AT4G33070	×	up	Repressed	Thiamine pyrophosphate dependent pyruvate decarboxylase family protein
AT4G33467	×	down	Induced	unknown protein
AT4G33560	up	up	Repressed	Wound-responsive family protein
AT4G33880	×	up	Repressed	ROOT HAIR DEFECTIVE 6-LIKE 2 (RSL2)
AT4G33905	×	up	Repressed	Peroxisomal membrane 22 kDa (Mpv17/PMP22) family protein
AT4G33980	×	down	Induced	BEST Arabidopsis thaliana protein match is: cold regulated gene 27 (TAIR:AT5G42900.2)
AT4G34138	×	down	Induced	UDP-glucosyl transferase 73B1 (UGT73B1)
AT4G34410	×	up	Repressed	redox responsive transcription factor 1 (RRTF1)
AT4G34510	up	up	Repressed	3-ketoacyl-CoA synthase 17 (KCS17)
AT4G34530	×	down	Induced	cryptochrome-interacting basic-helix-loop-helix 1 (CIB1)
AT4G34610	×	up	Repressed	BEL1-like homeodomain 6 (BLH6)
AT4G34740	×	up	Repressed	GLN phosphoribosyl pyrophosphate amidotransferase 2 (ASE2)
AT4G34770	down	down	Induced	SAUR-like auxin-responsive protein family
AT4G34790	×	up	Repressed	SAUR-like auxin-responsive protein family
AT4G35190	×	down	Induced	Putative lysine decarboxylase family protein
AT4G35720	down	down	Induced	Arabidopsis protein of unknown function (DUF241)
AT4G35730	×	up	Repressed	Regulator of Vps4 activity in the MVB pathway protein
AT4G35770	×	down	Induced	SENESCENCE 1 (SEN1)
AT4G36010	down	down	Induced	Pathogenesis-related thaumatin superfamily protein
AT4G36110	×	down	Induced	SAUR-like auxin-responsive protein family
AT4G36220	up	up	Repressed	ferulic acid 5-hydroxylase 1 (FAH1)
AT4G36240	×	up	Repressed	GATA transcription factor 7 (GATA7)
AT4G36520	down	×	Induced	Chaperone DnaJ-domain superfamily protein
AT4G36600	up	down	×	Late embryogenesis abundant (LEA) protein
AT4G36610	up	×	Repressed	alpha/beta-Hydrolases superfamily protein
AT4G36700	×	down	Induced	RmlC-like cupins superfamily protein
AT4G36770	×	up	Repressed	UDP-Glycosyltransferase superfamily protein
AT4G37150	×	up	Repressed	methyl esterase 9 (MES9)
AT4G37160	up	up	Repressed	SKU5 similar 15 (sks15)
AT4G37235	up	up	Repressed	Uncharacterised protein family (UPF0497)
AT4G37295	up	×	Repressed	unknown protein
AT4G37410	×	up	Repressed	cytochrome P450, family 81, subfamily F, polypeptide 4 (CYP81F4)
AT4G37490	up	up	Repressed	CYCLIN B1
AT4G37610	down	down	Induced	BTB and TAZ domain protein 5 (BT5)
AT4G37740	×	down	Induced	growth-regulating factor 2 (GRF2)
AT4G37770	×	down	Induced	1-amino-cyclopropane-1-carboxylate synthase 8 (ACS8)
AT4G37800	up	up	Repressed	xyloglucan endotransglucosylase/hydrolase 7 (XTH7)
AT4G37810	×	up	Repressed	unknown protein
AT4G38400	×	down	Induced	expansin-like A2 (EXLA2)
AT4G38580	×	down	Induced	farnesylated protein 6 (FP6)
AT4G38700	up	×	Repressed	Disease resistance-responsive (dirigent-like protein) family protein
AT4G38840	×	up	Repressed	SAUR-like auxin-responsive protein family
AT4G38860	×	down	Induced	SAUR-like auxin-responsive protein family
AT4G39480	×	up	Repressed	cytochrome P450, family 96, subfamily A, polypeptide 9 (CYP96A9)
AT4G39510	up	up	Repressed	cytochrome P450, family 96, subfamily A, polypeptide 12 (CYP96A12)
AT5G01015	×	up	Repressed	unknown protein
AT5G01215	×	down	Induced	other RNA
AT5G01300	×	down	Induced	PEBP (phosphatidylethanolamine-binding protein) family protein
AT5G01330	down	down	Induced	pyruvate decarboxylase-3 (PDC3)
AT5G01335	×	down	Induced	non-LTR retrotransposon family (LINE), has a 3.4e-29 P-value blast match to GB:AAA67727 reverse transcriptase (LINE-element) (Mus musculus)
AT5G01530	up	up	Repressed	light harvesting complex photosystem II (LHCB4.1)
AT5G01670	down	down	Induced	NAD(P)-linked oxidoreductase superfamily protein
AT5G01790	×	down	Induced	unknown protein
AT5G02020	down	down	Induced	unknown protein
AT5G02050	×	up	Repressed	Mitochondrial glycoprotein family protein
AT5G02200	down	down	Induced	far-red-elongated hypocotyl1-like (FHL)
AT5G02260	down	down	Induced	expansin A9 (EXPA9)
AT5G02490	×	up	Repressed	Heat shock protein 70 (Hsp 70) family protein
AT5G02540	down	down	Induced	NAD(P)-binding Rossmann-fold superfamily protein
AT5G02580	×	down	Induced	Plant protein 1589 of unknown function
AT5G02750	×	down	Induced	RING/U-box superfamily protein
AT5G02760	up	up	Repressed	Protein phosphatase 2C family protein
AT5G03210	×	down	Induced	unknown protein
AT5G03350	×	up	Repressed	Legume lectin family protein
AT5G03390	×	up	Repressed	Protein of unknown function (DUF295)
AT5G04010	×	down	Induced	F-box family protein
AT5G04120	×	down	Induced	Phosphoglycerate mutase family protein
AT5G04770	×	down	Induced	cationic amino acid transporter 6 (CAT6)
AT5G04950	up	×	Repressed	nicotianamine synthase 1 (NAS1)
AT5G04970	up	×	Repressed	Plant invertase/pectin methylesterase inhibitor superfamily
AT5G05270	up	up	Repressed	Chalcone-flavanone isomerase family protein
AT5G05320	×	down	Induced	FAD/NAD(P)-binding oxidoreductase family protein
AT5G05960	up	up	Repressed	Bifunctional inhibitor/lipid-transfer protein/seed storage 2S albumin superfamily protein
AT5G05965	down	down	Induced	unknown protein
AT5G06165	up	×	Repressed	unknown gene
AT5G06640	down	×	Induced	Proline-rich extensin-like family protein
AT5G06720	×	up	Repressed	peroxidase 2 (PA2)
AT5G07010	down	down	Induced	sulfotransferase 2A (ST2A)
AT5G07030	×	down	Induced	Eukaryotic aspartyl protease family protein
AT5G07200	down	down	Induced	gibberellin 20-oxidase 3 (GA20OX3)
AT5G07240	up	up	Repressed	IQ-domain 24 (IQD24)
AT5G07330	×	down	Induced	unknown protein
AT5G07475	×	up	Repressed	Cupredoxin superfamily protein
AT5G07530	×	down	Induced	glycine rich protein 17 (GRP17)
AT5G07610	×	up	Repressed	F-box family protein
AT5G07800	×	up	Repressed	Flavin-binding monooxygenase family protein
AT5G08030	×	up	Repressed	PLC-like phosphodiesterases superfamily protein
AT5G08050	×	up	Repressed	FUNCTIONS IN: molecular_function unknown
AT5G08350	down	down	Induced	GRAM domain-containing protein / ABA-responsive protein-related
AT5G08490	×	up	Repressed	Tetratricopeptide repeat (TPR)-like superfamily protein
AT5G08640	up	up	Repressed	flavonol synthase 1 (FLS1)
AT5G09370	×	down	Induced	Bifunctional inhibitor/lipid-transfer protein/seed storage 2S albumin superfamily protein
AT5G09420	×	up	Repressed	translocon at the outer membrane of chloroplasts 64-V (TOC64-V)
AT5G09480	×	up	Repressed	hydroxyproline-rich glycoprotein family protein
AT5G09520	×	up	Repressed	hydroxyproline-rich glycoprotein family protein
AT5G09570	×	up	Repressed	Cox19-like CHCH family protein
AT5G10120	×	down	Induced	Ethylene insensitive 3 family protein
AT5G10130	up	up	Repressed	Pollen Ole e 1 allergen and extensin family protein
AT5G10180	down	down	Induced	slufate transporter 2
AT5G10430	×	down	Induced	arabinogalactan protein 4 (AGP4)
AT5G10890	up	up	Repressed	myosin heavy chain-related
AT5G11060	×	up	Repressed	KNOTTED1-like homeobox gene 4 (KNAT4)
AT5G11240	×	up	Repressed	transducin family protein / WD-40 repeat family protein
AT5G11260	×	down	Induced	ELONGATED HYPOCOTYL 5 (HY5)
AT5G11412	×	up	Repressed	RNA-binding (RRM/RBD/RNP motifs) family protein
AT5G11870	×	up	Repressed	Alkaline phytoceramidase (aPHC)
AT5G12020	×	up	Repressed	17.6 kDa class II heat shock protein (HSP17.6II)
AT5G12110	up	up	Repressed	Glutathione S-transferase, C-terminal-like
AT5G12860	×	up	Repressed	dicarboxylate transporter 1 (DiT1)
AT5G12940	×	down	Induced	Leucine-rich repeat (LRR) family protein
AT5G13210	×	up	Repressed	Uncharacterised conserved protein UCP015417, vWA
AT5G13250	×	down	Induced	RING finger protein
AT5G13580	×	up	Repressed	ABC-2 type transporter family protein
AT5G13630	up	up	Repressed	GENOMES UNCOUPLED 5 (GUN5)
AT5G13770	up	×	Repressed	Pentatricopeptide repeat (PPR-like) superfamily protein
AT5G13930	up	up	Repressed	TRANSPARENT TESTA 4 (TT4)
AT5G14060	×	up	Repressed	CARAB-AK-LYS
AT5G14200	up	up	Repressed	isopropylmalate dehydrogenase 1
AT5G14360	×	down	Induced	Ubiquitin-like superfamily protein
AT5G14470	down	down	Induced	GHMP kinase family protein
AT5G15150	×	down	Induced	homeobox 3 (HB-3)
AT5G15290	×	down	Induced	Uncharacterised protein family (UPF0497)
AT5G15380	×	up	Repressed	domains rearranged methylase 1 (DRM1)
AT5G15830	down	down	Induced	basic leucine-zipper 3 (bZIP3)
AT5G15960	×	down	Induced	KIN1
AT5G16110	×	down	Induced	unknown protein
AT5G16170	×	down	Induced	Core-2/I-branching beta-1,6-N-acetylglucosaminyltransferase family protein
AT5G16190	×	up	Repressed	cellulose synthase like A11 (CSLA11)
AT5G16250	up	×	Repressed	unknown protein
AT5G16460	down	down	Induced	Putative adipose-regulatory protein (Seipin)
AT5G16790	×	up	Repressed	THO7
AT5G17230	×	up	Repressed	PHYTOENE SYNTHASE (PSY)
AT5G17430	×	down	Induced	BABY BOOM (BBM)
AT5G17850	×	down	Induced	Sodium/calcium exchanger family protein
AT5G18010	down	down	Induced	SAUR-like auxin-responsive protein family
AT5G18060	down	down	Induced	SAUR-like auxin-responsive protein family
AT5G18090	down	×	Induced	AP2/B3-like transcriptional factor family protein
AT5G18362	down	×	Induced	Cytokine-induced anti-apoptosis inhibitor 1, Fe-S biogenesis
AT5G18660	×	up	Repressed	PALE-GREEN AND CHLOROPHYLL B REDUCED 2 (PCB2)
AT5G19210	×	up	Repressed	P-loop containing nucleoside triphosphate hydrolases superfamily protein
AT5G19500	×	up	Repressed	Tryptophan/tyrosine permease
AT5G19750	×	up	Repressed	Peroxisomal membrane 22 kDa (Mpv17/PMP22) family protein
AT5G19875	×	down	Induced	unknown protein
AT5G19890	×	down	Induced	Peroxidase superfamily protein
AT5G19940	×	up	Repressed	Plastid-lipid associated protein PAP / fibrillin family protein
AT5G20160	×	up	Repressed	Ribosomal protein L7Ae/L30e/S12e/Gadd45 family protein
AT5G20250	down	×	Induced	DARK INDUCIBLE 10 (DIN10)
AT5G20420	×	down	Induced	chromatin remodeling 42 (CHR42)
AT5G20670	×	down	Induced	Protein of unknown function (DUF1677)
AT5G20740	up	up	Repressed	Plant invertase/pectin methylesterase inhibitor superfamily protein
AT5G21430	up	×	Repressed	Chaperone DnaJ-domain superfamily protein
AT5G21482	×	up	Repressed	cytokinin oxidase 7 (CKX7)
AT5G22100	×	up	Repressed	RNA cyclase family protein
AT5G22290	×	down	Induced	NAC domain containing protein 89 (NAC089)
AT5G22390	×	up	Repressed	Protein of unknown function (DUF3049)
AT5G22500	×	down	Induced	fatty acid reductase 1 (FAR1)
AT5G22555	up	up	Repressed	unknown protein
AT5G23010	×	up	Repressed	methylthioalkylmalate synthase 1 (MAM1)
AT5G23020	up	up	Repressed	2-isopropylmalate synthase 2 (IMS2)
AT5G23060	up	up	Repressed	calcium sensing receptor (CaS)
AT5G23350	down	down	Induced	GRAM domain-containing protein / ABA-responsive protein-related
AT5G23360	down	×	Induced	GRAM domain-containing protein / ABA-responsive protein-related
AT5G23750	×	down	Induced	Remorin family protein
AT5G23790	×	down	Induced	galactinol synthase 5 (GolS5)
AT5G23830	×	up	Repressed	MD-2-related lipid recognition domain-containing protein
AT5G23870	×	down	Induced	Pectinacetylesterase family protein
AT5G24070	×	up	Repressed	Peroxidase superfamily protein
AT5G24190	×	up	Repressed	Lipase class 3-related protein
AT5G24420	×	up	Repressed	6-phosphogluconolactonase 5 (PGL5)
AT5G24580	down	down	Induced	Heavy metal transport/detoxification superfamily protein
AT5G24660	×	up	Repressed	RESPONSE TO LOW SULFUR 2 (LSU2)
AT5G24910	×	down	Induced	cytochrome P450, family 714, subfamily A, polypeptide 1 (CYP714A1)
AT5G25040	×	up	Repressed	Major facilitator superfamily protein
AT5G25090	up	up	Repressed	early nodulin-like protein 13 (ENODL13)
AT5G25110	×	down	Induced	CBL-interacting protein kinase 25 (CIPK25)
AT5G25180	down	×	Induced	cytochrome P450, family 71, subfamily B, polypeptide 14 (CYP71B14)
AT5G25260	down	×	Induced	SPFH/Band 7/PHB domain-containing membrane-associated protein family
AT5G25280	×	down	Induced	serine-rich protein-related
AT5G25460	×	down	Induced	Protein of unknown function, DUF642
AT5G25840	up	×	Repressed	Protein of unknown function (DUF1677)
AT5G26146	×	down	Induced	other RNA
AT5G26170	up	up	Repressed	WRKY DNA-binding protein 50 (WRKY50)
AT5G26740	×	down	Induced	Protein of unknown function (DUF300)
AT5G26790	×	up	Repressed	unknown protein
AT5G26920	×	down	Induced	Cam-binding protein 60-like G (CBP60G)
AT5G26930	×	up	Repressed	GATA transcription factor 23 (GATA23)
AT5G27220	×	down	Induced	Frigida-like protein
AT5G27290	up	×	Repressed	unknown protein
AT5G27360	up	up	Repressed	SFP2
AT5G28080	×	down	Induced	WNK9
AT5G28773	×	up	Repressed	pseudogene, similar to Putative retroelement, similar to putative reverse transcriptase
AT5G35420	×	up	Repressed	pseudogene, hypothetical protein, similar to unknown protein (gb|AAD56332.1)
AT5G35525	×	down	Induced	PLAC8 family protein
AT5G35660	down	down	Induced	Glycine-rich protein family
AT5G35970	up	up	Repressed	P-loop containing nucleoside triphosphate hydrolases superfamily protein
AT5G36790	×	up	Repressed	Haloacid dehalogenase-like hydrolase (HAD) superfamily protein
AT5G36910	×	up	Repressed	thionin 2.2 (THI2.2)
AT5G37300	×	down	Induced	WSD1
AT5G37940	up	×	Repressed	Zinc-binding dehydrogenase family protein
AT5G37970	×	down	Induced	S-adenosyl-L-methionine-dependent methyltransferases superfamily protein
AT5G38000	×	up	Repressed	Zinc-binding dehydrogenase family protein
AT5G38005	×	down	Induced	other RNA
AT5G38020	up	up	Repressed	S-adenosyl-L-methionine-dependent methyltransferases superfamily protein
AT5G38030	×	up	Repressed	MATE efflux family protein
AT5G38280	×	down	Induced	PR5-like receptor kinase (PR5K)
AT5G38300	up	up	Repressed	unknown protein
AT5G38320	×	down	Induced	unknown protein
AT5G38430	×	up	Repressed	Ribulose bisphosphate carboxylase (small chain) family protein
AT5G38980	up	up	Repressed	unknown protein
AT5G39020	down	×	Induced	Malectin/receptor-like protein kinase family protein
AT5G39150	up	down	×	RmlC-like cupins superfamily protein
AT5G39180	up	down	×	RmlC-like cupins superfamily protein
AT5G39865	×	down	Induced	Glutaredoxin family protein
AT5G39870	×	down	Induced	Protein of unknown function (DUF1216)
AT5G40040	×	up	Repressed	60S acidic ribosomal protein family
AT5G40320	×	up	Repressed	Cysteine/Histidine-rich C1 domain family protein
AT5G40420	down	down	Induced	oleosin 2 (OLEO2)
AT5G40450	×	down	Induced	unknown protein
AT5G40720	×	down	Induced	CONTAINS InterPro DOMAIN/s: Protein of unknown function DUF23 (InterPro:IPR008166)
AT5G40850	×	up	Repressed	urophorphyrin methylase 1 (UPM1)
AT5G41050	up	×	Repressed	Pollen Ole e 1 allergen and extensin family protein
AT5G41080	down	down	Induced	PLC-like phosphodiesterases superfamily protein
AT5G41740	×	up	Repressed	Disease resistance protein (TIR-NBS-LRR class) family
AT5G41761	×	down	Induced	unknown protein
AT5G41900	×	down	Induced	alpha/beta-Hydrolases superfamily protein
AT5G42235	×	up	Repressed	Expressed protein
AT5G42290	down	down	Induced	transcription activator-related
AT5G42500	×	up	Repressed	Disease resistance-responsive (dirigent-like protein) family protein
AT5G42510	×	up	Repressed	Disease resistance-responsive (dirigent-like protein) family protein
AT5G42580	×	up	Repressed	cytochrome P450, family 705, subfamily A, polypeptide 12 (CYP705A12)
AT5G42700	×	up	Repressed	AP2/B3-like transcriptional factor family protein
AT5G42825	×	down	Induced	unknown protein
AT5G42900	down	down	Induced	cold regulated gene 27
AT5G42930	×	down	Induced	alpha/beta-Hydrolases superfamily protein
AT5G43290	×	down	Induced	WRKY DNA-binding protein 49 (WRKY49)
AT5G43300	×	down	Induced	PLC-like phosphodiesterases superfamily protein
AT5G43470	×	up	Repressed	RECOGNITION OF PERONOSPORA PARASITICA 8 (RPP8)
AT5G43520	×	down	Induced	Cysteine/Histidine-rich C1 domain family protein
AT5G43630	up	up	Repressed	TZP
AT5G43690	×	up	Repressed	P-loop containing nucleoside triphosphate hydrolases superfamily protein
AT5G43770	down	×	Induced	proline-rich family protein
AT5G44120	down	down	Induced	CRUCIFERINA (CRA1)
AT5G44130	×	down	Induced	FASCICLIN-like arabinogalactan protein 13 precursor (FLA13)
AT5G44255	×	down	Induced	gypsy-like retrotransposon family, has a 3.5e-09 P-value blast match to GB:AAD27547 polyprotein (Gypsy_Ty3-element) (Oryza sativa subsp. indica)
AT5G44260	×	down	Induced	Zinc finger C-x8-C-x5-C-x3-H type family protein
AT5G44360	down	×	Induced	FAD-binding Berberine family protein
AT5G44550	up	up	Repressed	Uncharacterised protein family (UPF0497)
AT5G44572	down	×	Induced	unknown protein
AT5G44920	×	down	Induced	Toll-Interleukin-Resistance (TIR) domain family protein
AT5G45210	×	down	Induced	Disease resistance protein (TIR-NBS-LRR class) family
AT5G45310	×	down	Induced	unknown protein
AT5G45700	up	up	Repressed	Haloacid dehalogenase-like hydrolase (HAD) superfamily protein
AT5G45850	×	up	Repressed	Protein of unknown function (DUF688)
AT5G46110	up	up	Repressed	ACCLIMATION OF PHOTOSYNTHESIS TO ENVIRONMENT 2 (APE2)
AT5G46470	×	up	Repressed	RESISTANT TO P. SYRINGAE 6 (RPS6)
AT5G46690	up	up	Repressed	beta HLH protein 71 (bHLH071)
AT5G46900	×	down	Induced	Bifunctional inhibitor/lipid-transfer protein/seed storage 2S albumin superfamily protein
AT5G47240	down	down	Induced	nudix hydrolase homolog 8 (NUDT8)
AT5G47450	×	down	Induced	tonoplast intrinsic protein 2
AT5G47500	up	×	Repressed	Pectin lyase-like superfamily protein
AT5G47980	up	up	Repressed	HXXXD-type acyl-transferase family protein
AT5G47990	×	up	Repressed	cytochrome P450, family 705, subfamily A, polypeptide 5 (CYP705A5)
AT5G48010	×	up	Repressed	thalianol synthase 1 (THAS1)
AT5G48110	down	×	Induced	Terpenoid cyclases/Protein prenyltransferases superfamily protein
AT5G48180	×	down	Induced	nitrile specifier protein 5 (NSP5)
AT5G48310	×	up	Repressed	unknown protein
AT5G48412	×	down	Induced	unknown gene
AT5G48800	×	down	Induced	Phototropic-responsive NPH3 family protein
AT5G48880	×	up	Repressed	PEROXISOMAL-3-KETO-ACYL-COA THIOLASE 1 (PKT1)
AT5G48900	×	down	Induced	Pectin lyase-like superfamily protein
AT5G48920	×	up	Repressed	tracheary element differentiation-related 7 (TED7)
AT5G49138	×	down	Induced	other RNA
AT5G50175	down	down	Induced	unknown protein
AT5G50750	×	down	Induced	reversibly glycosylated polypeptide 4 (RGP4)
AT5G50800	up	up	Repressed	Nodulin MtN3 family protein
AT5G51210	×	down	Induced	oleosin3 (OLEO3)
AT5G51440	×	up	Repressed	HSP20-like chaperones superfamily protein
AT5G51470	×	up	Repressed	Auxin-responsive GH3 family protein
AT5G51540	×	up	Repressed	Zincin-like metalloproteases family protein
AT5G51600	×	up	Repressed	PLEIADE (PLE)
AT5G51670	down	down	Induced	Protein of unknown function (DUF668)
AT5G52170	up	up	Repressed	homeodomain GLABROUS 7 (HDG7)
AT5G52260	up	×	Repressed	myb domain protein 19 (MYB19)
AT5G52300	×	down	Induced	LOW-TEMPERATURE-INDUCED 65 (LTI65)
AT5G52310	×	down	Induced	LOW-TEMPERATURE-INDUCED 78 (LTI78)
AT5G52570	×	up	Repressed	beta-carotene hydroxylase 2 (BETA-OHASE 2)
AT5G52860	×	up	Repressed	ABC-2 type transporter family protein
AT5G53190	×	down	Induced	Nodulin MtN3 family protein
AT5G53250	×	down	Induced	arabinogalactan protein 22 (AGP22)
AT5G53660	×	down	Induced	growth-regulating factor 7 (GRF7)
AT5G53830	down	×	Induced	VQ motif-containing protein
AT5G53920	up	×	Repressed	ribosomal protein L11 methyltransferase-related
AT5G53980	×	down	Induced	homeobox protein 52 (HB52)
AT5G54000	down	×	Induced	2-oxoglutarate (2OG) and Fe(II)-dependent oxygenase superfamily protein
AT5G54080	down	down	Induced	homogentisate 1,2-dioxygenase (HGO)
AT5G54095	up	×	Repressed	unknown protein
AT5G54270	up	up	Repressed	light-harvesting chlorophyll B-binding protein 3 (LHCB3)
AT5G54370	up	up	Repressed	Late embryogenesis abundant (LEA) protein-related
AT5G54400	×	down	Induced	S-adenosyl-L-methionine-dependent methyltransferases superfamily protein
AT5G54470	down	down	Induced	B-box type zinc finger family protein
AT5G54585	×	down	Induced	unknown protein
AT5G54740	down	×	Induced	seed storage albumin 5 (SESA5)
AT5G54770	×	up	Repressed	THI1
AT5G55180	up	up	Repressed	O-Glycosyl hydrolases family 17 protein
AT5G55250	up	up	Repressed	IAA carboxylmethyltransferase 1 (IAMT1)
AT5G55450	up	up	Repressed	Bifunctional inhibitor/lipid-transfer protein/seed storage 2S albumin superfamily protein
AT5G55620	up	up	Repressed	unknown protein
AT5G55970	×	down	Induced	RING/U-box superfamily protein
AT5G56230	×	up	Repressed	prenylated RAB acceptor 1.G2 (PRA1.G2)
AT5G56310	up	×	Repressed	Pentatricopeptide repeat (PPR) superfamily protein
AT5G56490	×	up	Repressed	D-arabinono-1,4-lactone oxidase family protein
AT5G56550	×	down	Induced	OXIDATIVE STRESS 3 (OXS3)
AT5G56980	×	down	Induced	unknown protein
AT5G56990	×	down	Induced	BEST Arabidopsis thaliana protein match is: Cystatin/monellin superfamily protein (TAIR:AT5G56920.1)
AT5G57123	up	up	Repressed	unknown protein
AT5G57240	×	down	Induced	OSBP(oxysterol binding protein)-related protein 4C (ORP4C)
AT5G57345	up	up	Repressed	unknown protein
AT5G57380	×	down	Induced	VERNALIZATION INSENSITIVE 3 (VIN3)
AT5G57480	×	down	Induced	P-loop containing nucleoside triphosphate hydrolases superfamily protein
AT5G57500	up	up	Repressed	Galactosyltransferase family protein
AT5G57760	×	down	Induced	unknown protein
AT5G57790	down	×	Induced	unknown protein
AT5G58784	×	up	Repressed	Undecaprenyl pyrophosphate synthetase family protein
AT5G58860	×	up	Repressed	cytochrome P450, family 86, subfamily A, polypeptide 1 (CYP86A1)
AT5G59040	down	down	Induced	copper transporter 3 (COPT3)
AT5G59050	×	down	Induced	unknown protein
AT5G59130	up	up	Repressed	Subtilase family protein
AT5G59240	×	up	Repressed	Ribosomal protein S8e family protein
AT5G59570	×	down	Induced	Homeodomain-like superfamily protein
AT5G59930	×	down	Induced	Cysteine/Histidine-rich C1 domain family protein
AT5G59940	×	down	Induced	Cysteine/Histidine-rich C1 domain family protein
AT5G60250	up	up	Repressed	zinc finger (C3HC4-type RING finger) family protein
AT5G60520	up	up	Repressed	Late embryogenesis abundant (LEA) protein-related
AT5G60660	×	down	Induced	plasma membrane intrinsic protein 2
AT5G60680	×	down	Induced	Protein of unknown function, DUF584
AT5G60760	×	down	Induced	P-loop containing nucleoside triphosphate hydrolases superfamily protein
AT5G61030	×	up	Repressed	glycine-rich RNA-binding protein 3 (GR-RBP3)
AT5G61270	×	up	Repressed	phytochrome-interacting factor7 (PIF7)
AT5G61420	×	up	Repressed	myb domain protein 28 (MYB28)
AT5G61490	×	up	Repressed	Uncharacterised conserved protein (UCP012943)
AT5G61600	×	down	Induced	ethylene response factor 104 (ERF104)
AT5G62210	×	up	Repressed	Embryo-specific protein 3, (ATS3)
AT5G62330	up	×	Repressed	BEST Arabidopsis thaliana protein match is: Plant invertase/pectin methylesterase inhibitor superfamily protein (TAIR:AT5G62340.1)
AT5G62360	×	up	Repressed	Plant invertase/pectin methylesterase inhibitor superfamily protein
AT5G62490	×	down	Induced	HVA22 homologue B (HVA22B)
AT5G62720	×	up	Repressed	Integral membrane HPP family protein
AT5G62800	down	down	Induced	Protein with RING/U-box and TRAF-like domains
AT5G63350	×	down	Induced	unknown protein
AT5G63650	×	down	Induced	SNF1-related protein kinase 2.5 (SNRK2.5)
AT5G64040	up	up	Repressed	PSAN
AT5G64060	up	up	Repressed	NAC domain containing protein 103 (NAC103)
AT5G64080	×	up	Repressed	Bifunctional inhibitor/lipid-transfer protein/seed storage 2S albumin superfamily protein
AT5G64120	×	down	Induced	Peroxidase superfamily protein
AT5G64530	×	up	Repressed	xylem NAC domain 1 (XND1)
AT5G64770	up	up	Repressed	root meristem growth factor 9 (RGF9)
AT5G64850	×	up	Repressed	FUNCTIONS IN: molecular_function unknown
AT5G65010	×	up	Repressed	asparagine synthetase 2 (ASN2)
AT5G65030	up	up	Repressed	unknown protein
AT5G65165	×	down	Induced	succinate dehydrogenase 2-3 (SDH2-3)
AT5G65320	×	up	Repressed	basic helix-loop-helix (bHLH) DNA-binding superfamily protein
AT5G65340	×	up	Repressed	Protein of unknown function, DUF617
AT5G65550	down	down	Induced	UDP-Glycosyltransferase superfamily protein
AT5G65690	down	×	Induced	phosphoenolpyruvate carboxykinase 2 (PCK2)
AT5G65730	up	up	Repressed	xyloglucan endotransglucosylase/hydrolase 6 (XTH6)
AT5G65800	×	down	Induced	ACC synthase 5 (ACS5)
AT5G65850	×	up	Repressed	F-box and associated interaction domains-containing protein
AT5G66400	down	down	Induced	RESPONSIVE TO ABA 18 (RAB18)
AT5G66558	×	down	Induced	other RNA
AT5G66570	up	×	Repressed	PS II oxygen-evolving complex 1 (PSBO1)
AT5G66590	×	down	Induced	CAP (Cysteine-rich secretory proteins, Antigen 5, and Pathogenesis-related 1 protein) superfamily protein
AT5G66650	down	down	Induced	Protein of unknown function (DUF607)
AT5G66700	down	down	Induced	homeobox 53 (HB53)
AT5G66780	×	down	Induced	unknown protein
AT5G66815	up	×	Repressed	unknown protein
AT5G66985	×	up	Repressed	unknown protein
AT5G67020	×	down	Induced	unknown protein
AT5G67270	×	up	Repressed	end binding protein 1C (EB1C)
AT5G67620	×	up	Repressed	unknown protein
ATCG00160	up	×	Repressed	ribosomal protein S2 (RPS2)
ATCG00170	up	×	Repressed	RPOC2
ATCG00380	up	×	Repressed	chloroplast ribosomal protein S4 (RPS4)
ATCG01050	up	×	Repressed	NDHD
ATMG00670	×	up	Repressed	FUNCTIONS IN: molecular_function unknown
ATMG01320	×	up	Repressed	NADH dehydrogenase 2B (NAD2B)
