# Supplementary material for: A Quartet of PIF bHLH Factors Provides a Transcriptionally Centered Signaling Hub That Regulates Seedling Morphogenesis through Differential Expression-Patterning of Shared Target Genes in Arabidopsis
Source: PLoS Genet. 2013 Jan 31;9(1):e1003244. doi: 10.1371/journal.pgen.1003244 (PMC3561105; doi:10.1371/journal.pgen.1003244)
Supplement: Table S11 — List of PIF3-, PIF4 and/or PIF5-bound, PIF-regulated (Class X, Y and Z) genes. (XLS) [file pgen.1003244.s018.xls]

## Sheet: Table_S11
Table S11. List of PIF3-, PIF4- and/or PIF5-bound, PIF-regulated (Class X, Y and Z) genes.
Locus	Annotation	Motif Association	PIF3 Regulation	PIF-quartet Regulation	PIF1/4/5-trio Regulatiuon	Classification	Functional Category	PIF4-bounda	PIF5-boundb		a PIF4-bound: Genes associated with PIF4-binding sites identified by Oh et al. (2012) Nat Cell Biol, 14:802-809 [ref. #24]
PIF-quartet-induced											b PIF5-bound: Genes associated with PIF5-binding sites identified by Hornitschek et al. (2012) Plant J, 71:699-711 [ref. #21]
AT5G02540	NAD(P)-binding Rossmann-fold superfamily protein	PBE	---	Induced	Induced	Y	Cellular Metabolism	PIF4	PIF5
AT1G45130	BGAL5	PBE	---	Induced	Induced	Y	Cellular Metabolism	PIF4	PIF5
AT4G16770	2OG and Fe(II)-dependent oxygenase superfamily protein	G/PBE	---	Induced	Induced	Y	Cellular Metabolism	PIF4	---
AT5G48900	Pectin lyase-like superfamily protein	G	---	Induced	Induced	Y	Cellular Metabolism	PIF4	PIF5
AT1G10560	PUB18	G/PBE	---	Induced	---	Y	Cellular Metabolism	PIF4	PIF5
AT1G68620	alpha/beta-Hydrolases superfamily protein	G	---	Induced	Induced	Y	Cellular Metabolism	PIF4	---
AT2G18700	TPS11	G/PBE	---	Induced	Induced	Y	Cellular Metabolism	PIF4	PIF5
AT3G14205	phosphoinositide phosphatase family protein	G	---	Induced	---	Y	Cellular Metabolism	PIF4	PIF5
AT3G19390	Granulin repeat cysteine protease family protein	G	---	Induced	---	Y	Cellular Metabolism	PIF4	PIF5
AT5G58660	2OG and Fe(II)-dependent oxygenase superfamily protein	G	---	Induced	---	Y	Cellular Metabolism	PIF4	PIF5
AT2G41850	PGAZAT/ADPG2	G/PBE	---	Induced	Induced	Y	Growth/Development	---	---
AT2G40610	EXPAPhotosynthesis/Chloroplast	PBE	---	Induced	Induced	Y	Growth/Development	PIF4	PIF5
AT5G07010	ST2A	G	---	Induced	Induced	Y	Hormone	PIF4	PIF5
AT1G02400	GA2OX6	PBE	---	Induced	Induced	Y	Hormone	PIF4	PIF5
AT1G73000	PYL3/RCAR13	G	---	Induced	Induced	Y	Hormone	PIF4	---
AT2G41310	ARR8	PBE	---	Induced	---	Y	Hormone	PIF4	---
AT4G38860	SAUR16	PBE	---	Induced	Induced	Y	Hormone	PIF4	PIF5
AT5G18030	SAUR21	PBE	---	Induced	---	Y	Hormone	PIF4	PIF5
AT4G31390	Protein kinase superfamily protein	G	---	Induced	---	Y	Photosynthesis/Chloroplast	PIF4	PIF5
AT2G34020	Calcium-binding EF-hand family protein	G	---	Induced	Induced	Y	Signaling	PIF4	---
AT3G29575	AFP3	G	---	Induced	Induced	Y	Signaling	PIF4	PIF5
AT4G25390	Protein kinase superfamily protein	G	---	Induced	Induced	Y	Signaling	---	---
AT1G12080	Vacuolar calcium-binding protein-related	PBE	---	Induced	Induced	Y	Signaling	PIF4	PIF5
AT1G74740	CPK30	PBE	---	Induced	---	Y	Signaling	PIF4	---
AT1G77000	SKP2B	G	---	Induced	Induced	Y	Signaling	---	---
AT4G35470	PIRL4	G/PBE	---	Induced	---	Y	Signaling	PIF4	PIF5
AT4G38470	STY46	G/PBE	---	Induced	---	Y	Signaling	PIF4	---
AT5G58320	KIP1-like family protein	G	---	Induced	---	Y	Signaling	---	PIF5
AT4G36010	Pathogenesis-related thaumatin superfamily protein	G	---	Induced	Induced	Y	Stress/Defense	PIF4	---
AT3G54510	ERD4	PBE	---	Induced	Induced	Y	Stress/Defense	PIF4	---
AT4G20260	PACP1	PBE	---	Induced	Induced	Y	Stress/Defense	---	---
AT1G11960	ERD family protein	G/PBE	---	Induced	Induced	Y	Stress/Defense	---	PIF5
AT1G21980	PIP5K1	G/PBE	---	Induced	---	Y	Stress/Defense	PIF4	---
AT2G47440	TPR-like superfamily protein	G	---	Induced	---	Y	Stress/Defense	PIF4	---
AT3G30775	ERD5	G	---	Induced	Induced	Y	Stress/Defense	PIF4	PIF5
AT3G55610	P5CS2	G/PBE	---	Induced	Induced	Y	Stress/Defense	PIF4	---
AT5G42900	COR27	G	---	Induced	Induced	Y	Stress/Defense	---	PIF5
AT1G69690	TCP15	G	---	Induced	Induced	Y	Transcription	PIF4	PIF5
AT1G77200	DREB subfamily A-4 protein of ERF/AP2 transcription factor family	PBE	---	Induced	Induced	Y	Transcription	PIF4	---
AT3G15540	IAA19/MSG2	G/PBE	---	Induced	Induced	Y	Transcription	PIF4	PIF5
AT3G25730	EDF3	PBE	---	Induced	Induced	Y	Transcription	PIF4	---
AT3G61830	ARF18	G/PBE	---	Induced	Induced	Y	Transcription	---	---
AT3G62090	PIF6/PIL2/bHLH132	G	---	Induced	Induced	Y	Transcription	PIF4	PIF5
AT4G16780	ATHB-2	G	---	Induced	Induced	Y	Transcription	PIF4	PIF5
AT4G32280	IAA29	G	---	Induced	Induced	Y	Transcription	PIF4	PIF5
AT5G53980	HB52	G	---	Induced	Induced	Y	Transcription	PIF4	PIF5
AT2G42870	PAR1/HLH1	PBE	---	Induced	Induced	Y	Transcription	PIF4	PIF5
AT2G44910	HB4	G	---	Induced	Induced	Y	Transcription	PIF4	PIF5
AT1G18400	BEE1/bHLH44	G	---	Induced	Induced	Y	Transcription	PIF4	PIF5
AT1G20900	ESC/AHL27	G	---	Induced	Induced	Y	Transcription	PIF4	PIF5
AT2G41070	EEL/BZIP12	G/PBE	---	Induced	Induced	Y	Transcription	PIF4	PIF5
AT2G43060	IBH1/bHLH158	PBE	---	Induced	---	Y	Transcription	PIF4	PIF5
AT4G01250	WRKY22	G	---	Induced	Induced	Y	Transcription	PIF4	PIF5
AT4G34000	ABF3/bZIP37	G	---	Induced	---	Y	Transcription	PIF4	PIF5
AT1G69570	Dof-type zinc finger DNA-binding family protein	G/PBE	---	Induced	Induced	Y	Transcription	PIF4	PIF5
AT3G23050	IAA7/AXR2	G/PBE	---	Induced	Induced	Y	Transcription	PIF4	PIF5
AT4G30410	bHLH159	PBE	---	Induced	Induced	Y	Transcription	PIF4	PIF5
AT1G67590	Remorin family protein	G	---	Induced	---	Y	Transcription	PIF4	PIF5
AT1G78700	BEH4	G	---	Induced	Induced	Y	Transcription	PIF4	PIF5
AT2G46270	GBF3/bZIP55	PBE	---	Induced	Induced	Y	Transcription	PIF4	PIF5
AT3G19580	AZF2	G	---	Induced	Induced	Y	Transcription	PIF4	---
AT3G57800	bHLH60	G	---	Induced	---	Y	Transcription	PIF4	PIF5
AT4G27310	BBX28	G	---	Induced	Induced	Y	Transcription	PIF4	PIF5
AT4G34530	CIB1/bHLH63	G/PBE	---	Induced	Induced	Y	Transcription	PIF4	---
AT4G37790	HAT22	PBE	---	Induced	---	Y	Transcription	PIF4	---
AT5G08130	BIM1/bHLH46	G	---	Induced	---	Y	Transcription	PIF4	PIF5
AT5G66700	HB53	G	---	Induced	Induced	Y	Transcription	PIF4	---
AT1G34630	Tim17/Tim22/Tim23 family protein	G	---	Induced	Induced	Y	Transport	PIF4	---
AT3G24840	Sec14p-like phosphatidylinositol transfer family protein	G	---	Induced	---	Y	Transport	---	---
AT2G47160	BOR1	PBE	---	Induced	Induced	Y	Transport	PIF4	PIF5
AT5G60680	unknown protein	G	---	Induced	Induced	Y	Unknown	PIF4	PIF5
AT1G16850	unknown protein	G/PBE	---	Induced	Induced	Y	Unknown	PIF4	PIF5
AT2G28400	unknown protein	G	---	Induced	Induced	Y	Unknown	---	---
AT5G66590	CAP superfamily protein	G/PBE	---	Induced	Induced	Y	Unknown	PIF4	PIF5
AT3G59930	defensin-like (DEFL) family protein	PBE	---	Induced	---	Y	Unknown	PIF4	---
AT3G20340	unknown protein	PBE	---	Induced	Induced	Y	Unknown	PIF4	---
AT5G25460	unknown protein	G	---	Induced	Induced	Y	Unknown	PIF4	PIF5
AT1G52343	unknown protein	PBE	---	Induced	Induced	Y	Unknown	---	---
AT1G72490	unknown protein	G	---	Induced	Induced	Y	Unknown	PIF4	PIF5
AT1G78230	Outer arm dynein light chain 1 protein	PBE	---	Induced	Induced	Y	Unknown	PIF4	---
AT2G25460	unknown protein	G	---	Induced	---	Y	Unknown	PIF4	PIF5
AT2G34185	unknown protein	G	---	Induced	---	Y	Unknown	PIF4	---
AT3G07380	unknown protein	G	---	Induced	Induced	Y	Unknown	PIF4	PIF5
AT3G27210	unknown protein	G	---	Induced	---	Y	Unknown	---	---
AT3G50800	unknown protein	G	---	Induced	---	Y	Unknown	PIF4	---
AT5G03210	unknown protein	G	---	Induced	Induced	Y	Unknown	PIF4	---
AT5G05965	unknown protein	G	---	Induced	Induced	Y	Unknown	PIF4	PIF5
AT5G56980	unknown protein	G	---	Induced	Induced	Y	Unknown	PIF4	---
AT2G31980	CYS2	G	Induced	Induced	Induced	Z	Cellular Metabolism	---	PIF5
AT4G11050	GH9C3	G/PBE	Induced	Induced	Induced	Z	Cellular Metabolism	PIF4	PIF5
AT5G04120	Phosphoglycerate mutase family protein	G	Induced	Induced	Induced	Z	Cellular Metabolism	PIF4	PIF5
AT5G51210	OLEO3	G	Induced	Induced	Induced	Z	Cellular Metabolism	PIF4	---
AT1G10550	XTH33	G/PBE	Induced	Induced	Induced	Z	Growth/Development	PIF4	---
AT4G14130	XTR7/XTH15	G	Induced	Induced	Induced	Z	Growth/Development	PIF4	PIF5
AT1G67265	RTFL21/DVL3	PBE	Induced	Induced	Induced	Z	Growth/Development	PIF4	PIF5
AT3G48260	WNK3	G	Induced	Induced	Induced	Z	Signaling	PIF4	---
AT5G63650	SNRK2.5	G/PBE	Induced	Induced	Induced	Z	Stress/Defense	PIF4	---
AT2G33380	RD20/CLO3	G	Induced	Induced	Induced	Z	Stress/Defense	---	PIF5
AT1G02340	HFR1/bHLH26	G	Induced	Induced	Induced	Z	Transcription	PIF4	PIF5
AT5G54470	BBX29	G	Induced	Induced	Induced	Z	Transcription	PIF4	PIF5
AT2G46970	PIL1/bHLH124	G	Induced	Induced	Induced	Z	Transcription	PIF4	PIF5
AT3G21330	bHLH87	G	Induced	Induced	Induced	Z	Transcription	PIF4	---
AT4G35720	unknown protein	PBE	Induced	Induced	Induced	Z	Unknown	PIF4	PIF5
AT5G02580	unknown protein	G	Induced	Induced	Induced	Z	Unknown	PIF4	PIF5
AT3G17110	pseudogene	G	Induced	Induced	Induced	Z	Unknown	---	PIF5
AT3G17580	unknown protein	PBE	Induced	Induced	Induced	Z	Unknown	PIF4	---
AT5G26146	miscRNA	G/PBE	Induced	Induced	Induced	Z	Unknown	PIF4	---
PIF-quartet-repressed
AT4G37470	KAI2	G	---	Repressed	---	Y	Cellular Metabolism	PIF4	---
AT1G23100	GroES-like family protein	PBE	---	Repressed	Repressed	Y	Cellular Metabolism	PIF4	---
AT4G00810	60S acidic ribosomal protein P1	G	---	Repressed	---	Y	Cellular Metabolism	PIF4	PIF5
AT4G15000	60S ribosomal protein L27	PBE	---	Repressed	---	Y	Cellular Metabolism	---	---
AT4G20240	CYP71A27	PBE	---	Repressed	---	Y	Cellular Metabolism	---	---
AT4G36770	UDP-Glycosyltransferase superfamily protein	G	---	Repressed	Repressed	Y	Cellular Metabolism	PIF4	PIF5
AT5G20630	GER3	PBE	---	Repressed	---	Y	Growth/Development	PIF4	---
AT5G64530	XND1/ANAC104	G/PBE	---	Repressed	Repressed	Y	Growth/Development	---	---
AT5G17230	PSY	G	---	Repressed	Repressed	Y	Photosynthesis/Chloroplast	---	---
AT3G61470	LHCA2	G	---	Repressed	Repressed	Y	Photosynthesis/Chloroplast	PIF4	PIF5
AT2G14880	SWIB/MDM2 domain superfamily protein	PBE	---	Repressed	---	Y	Photosynthesis/Chloroplast	PIF4	---
AT3G12930	Lojap-related protein	G	---	Repressed	---	Y	Photosynthesis/Chloroplast	PIF4	---
AT4G25630	FIB2	PBE	---	Repressed	Repressed	Y	Signaling	PIF4	---
AT3G51660	Tautomerase/MIF superfamily protein	PBE	---	Repressed	---	Y	Stress/Defense	PIF4	PIF5
AT1G25440	COL16	PBE	---	Repressed	Repressed	Y	Transcription	PIF4	PIF5
AT1G68120	BPC3	PBE	---	Repressed	---	Y	Transcription	PIF4	---
AT1G08560	KNOLLE/SYP111	G	---	Repressed	Repressed	Y	Transport	PIF4	PIF5
AT2G46535	unknown protein	G	---	Repressed	Repressed	Y	Unknown	---	---
AT5G54530	unknown protein	G	---	Repressed	---	Y	Unknown	PIF4	---
AT4G05180	PSBQ-2	G	Repressed	Repressed	Repressed	Z	Photosynthesis/Chloroplast	PIF4	PIF5
AT5G16030	unknown protein	G	Repressed	Repressed	---	Z	Unknown	PIF4	PIF5
PIF3-only-induced
AT1G09350	ATGOLS3	G/PBE	Induced	---	---	X	Cellular Metabolism	PIF4	---
